# Supplementary material for: Metal-free in situ sp3, sp2, and sp C–H functionalization and oxidative cross coupling with benzamidines hydrochloride: a promising approach for the synthesis of α-ketoimides
Source: Royal Society of Chemistry journal article supplement (doi:10.1039/c4ra07556k), 2014-01-01

## **Metal-Free in Situ $sp^3$ , $sp^2$ , and $sp$ C-H Functionalization and Oxidative Cross Coupling with Benzamidines Hydrochloride: A Promising Approach for the Synthesis of $\alpha$ -Ketoimides**

Hanuman P. Kalmode,<sup>†</sup> Kamlesh S. Vadagaonkar,<sup>†</sup> and Atul C. Chaskar<sup>†\*</sup>

<sup>†</sup>*Department of Dyestuff Technology, Institute of Chemical Technology, Mumbai 400019, India*  
*Tel.: +91-22- 3361 1111/ 2707; Fax: +91-22- 3361 1020; E-mail: achaskar25@gmail.com*

### **Supporting Information**

#### **Content**

1. Copies of  $^1\text{H}$  and  $^{13}\text{C}$  NMR spectra of the products .....2-45

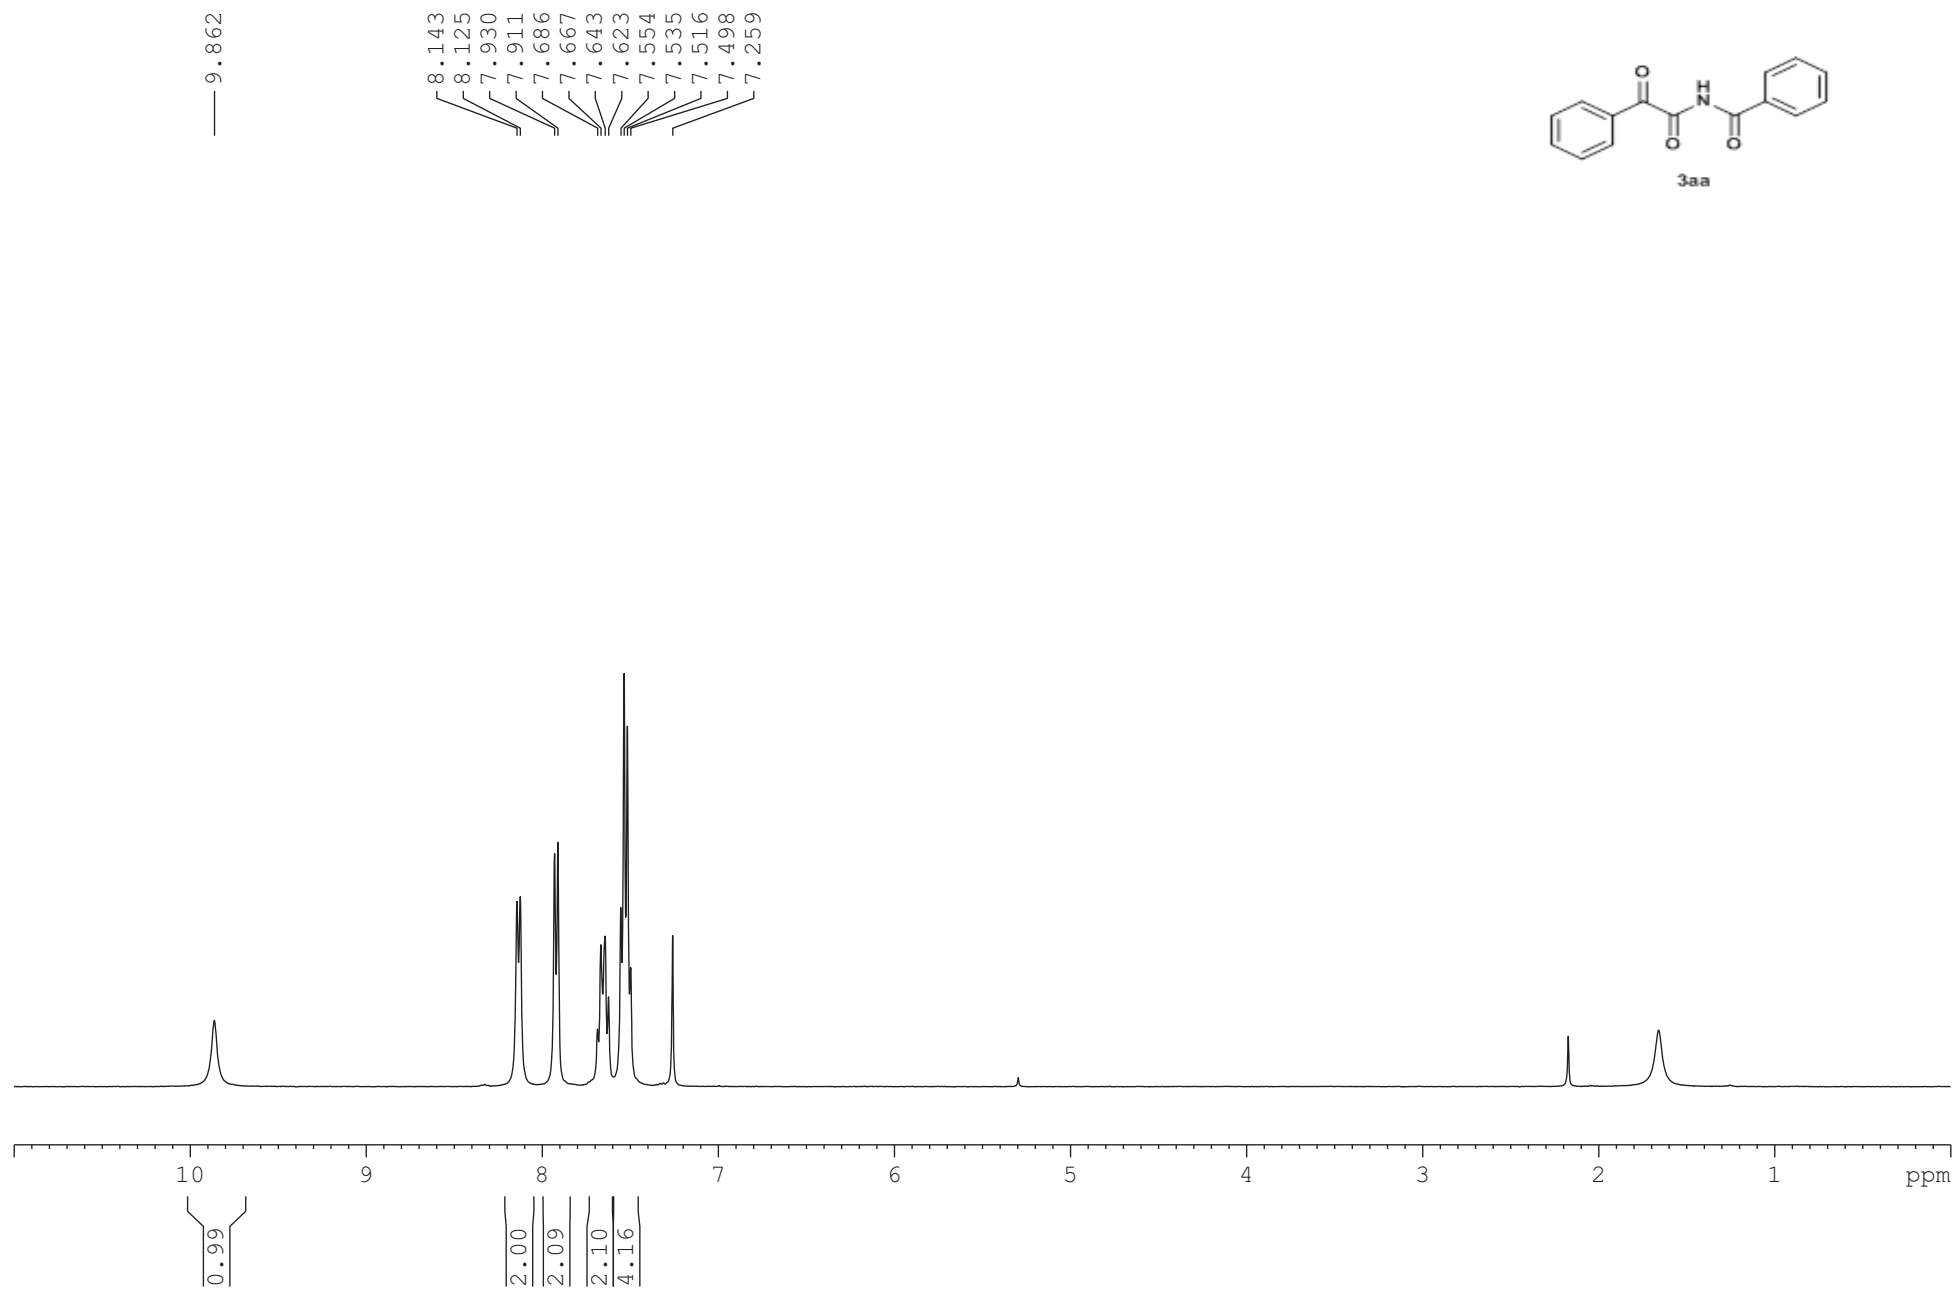

—186.617

—165.313

134.715

133.999

132.396

131.063

130.166

129.145

128.948

128.132

77.453

77.030

76.606

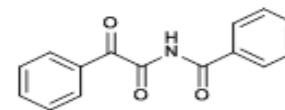

3aa

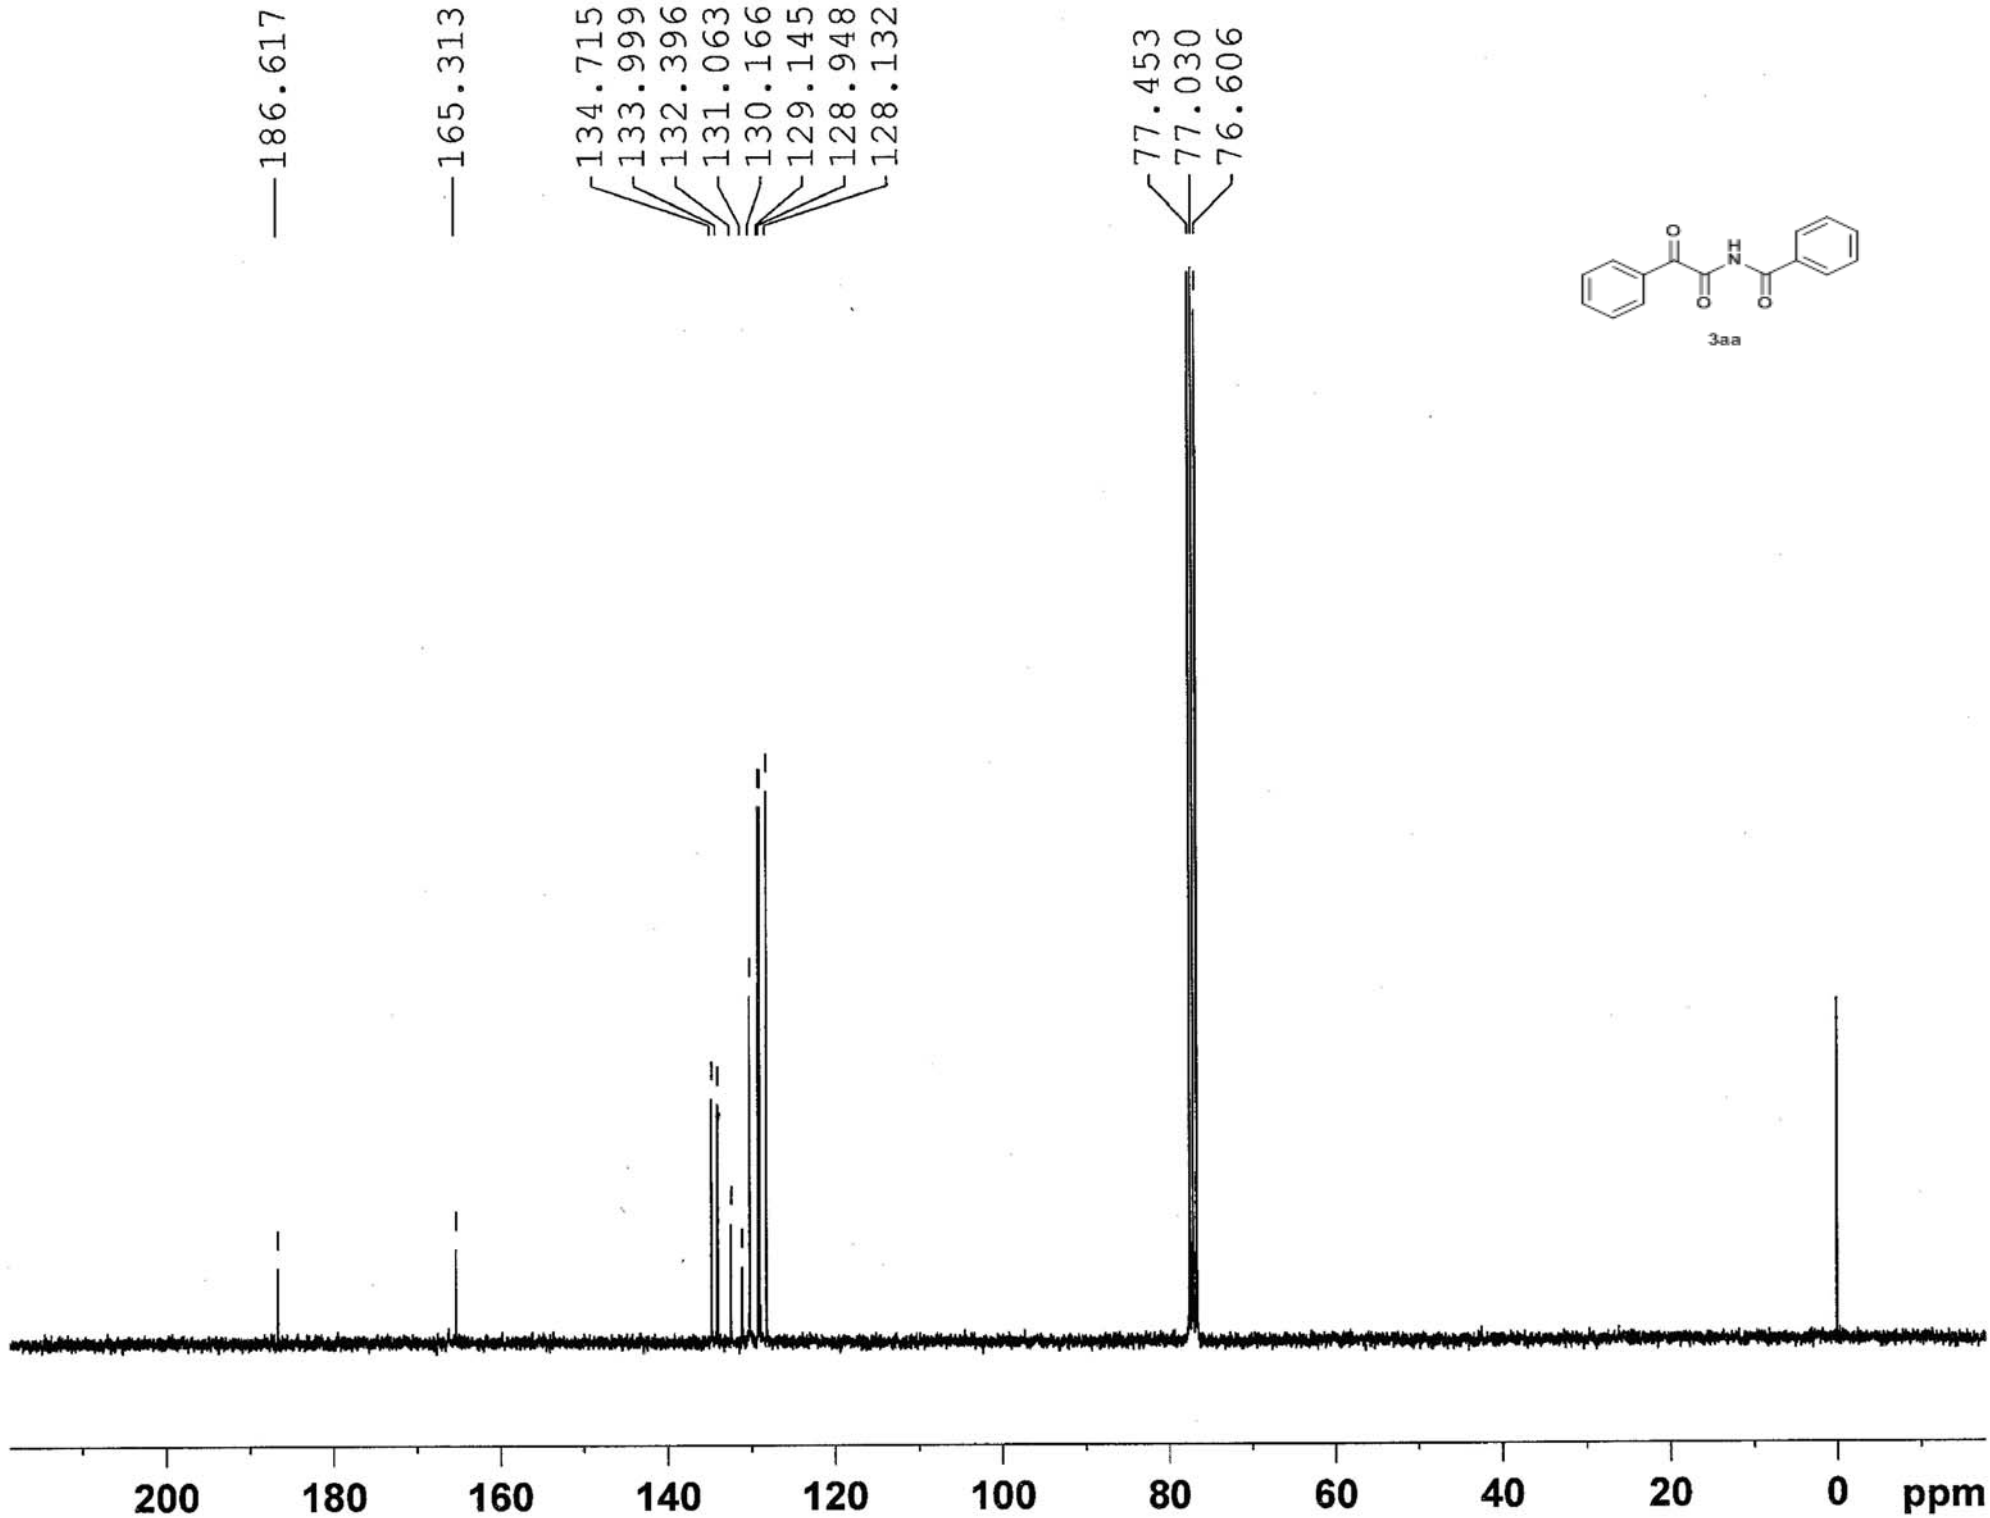

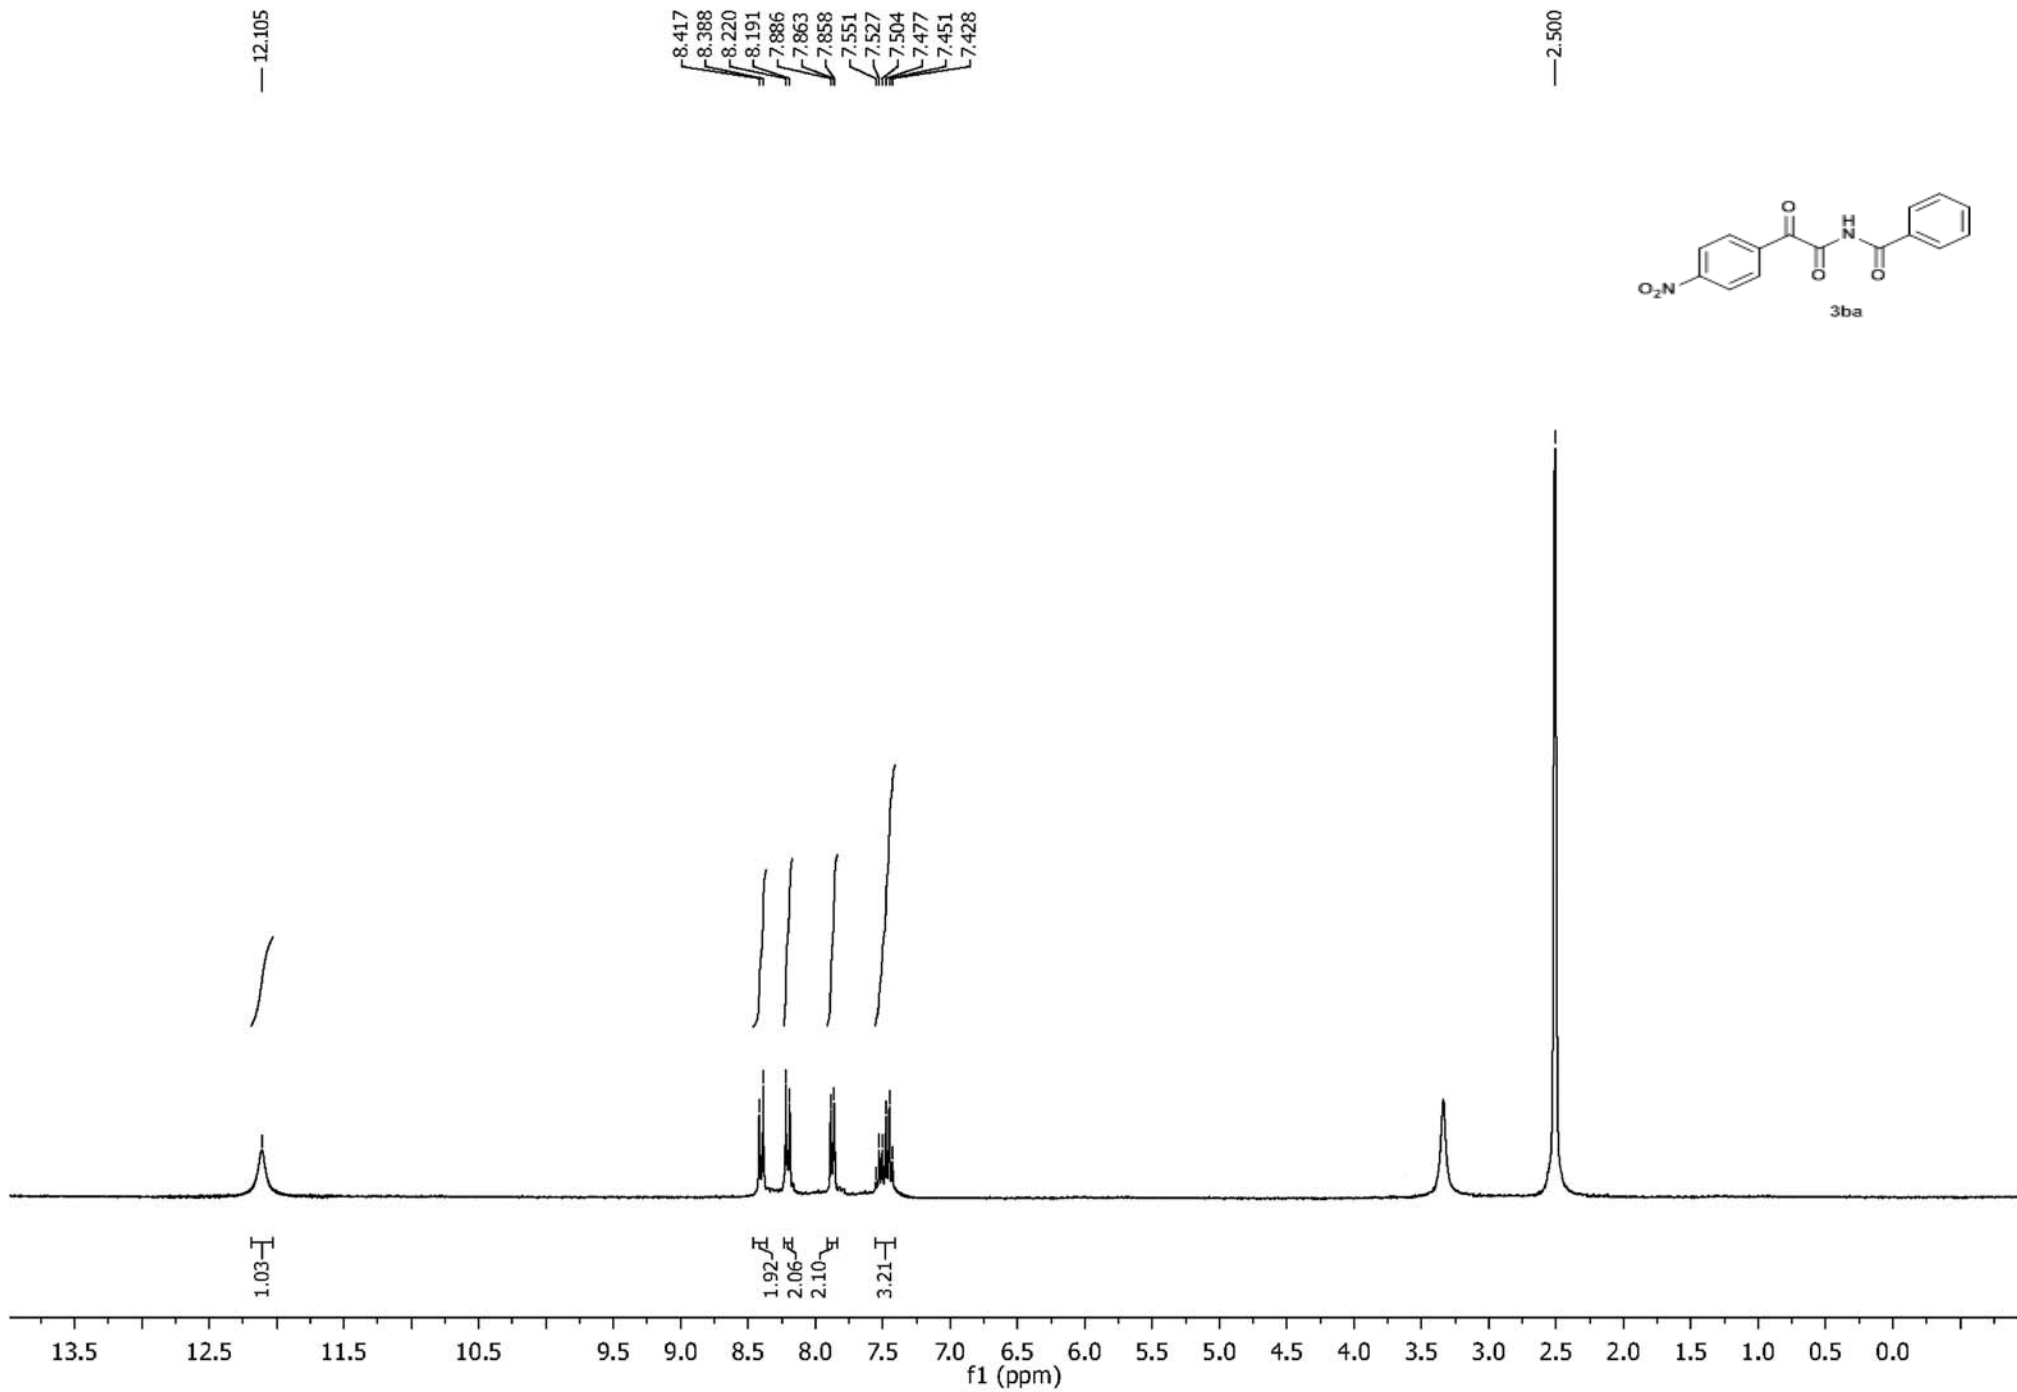

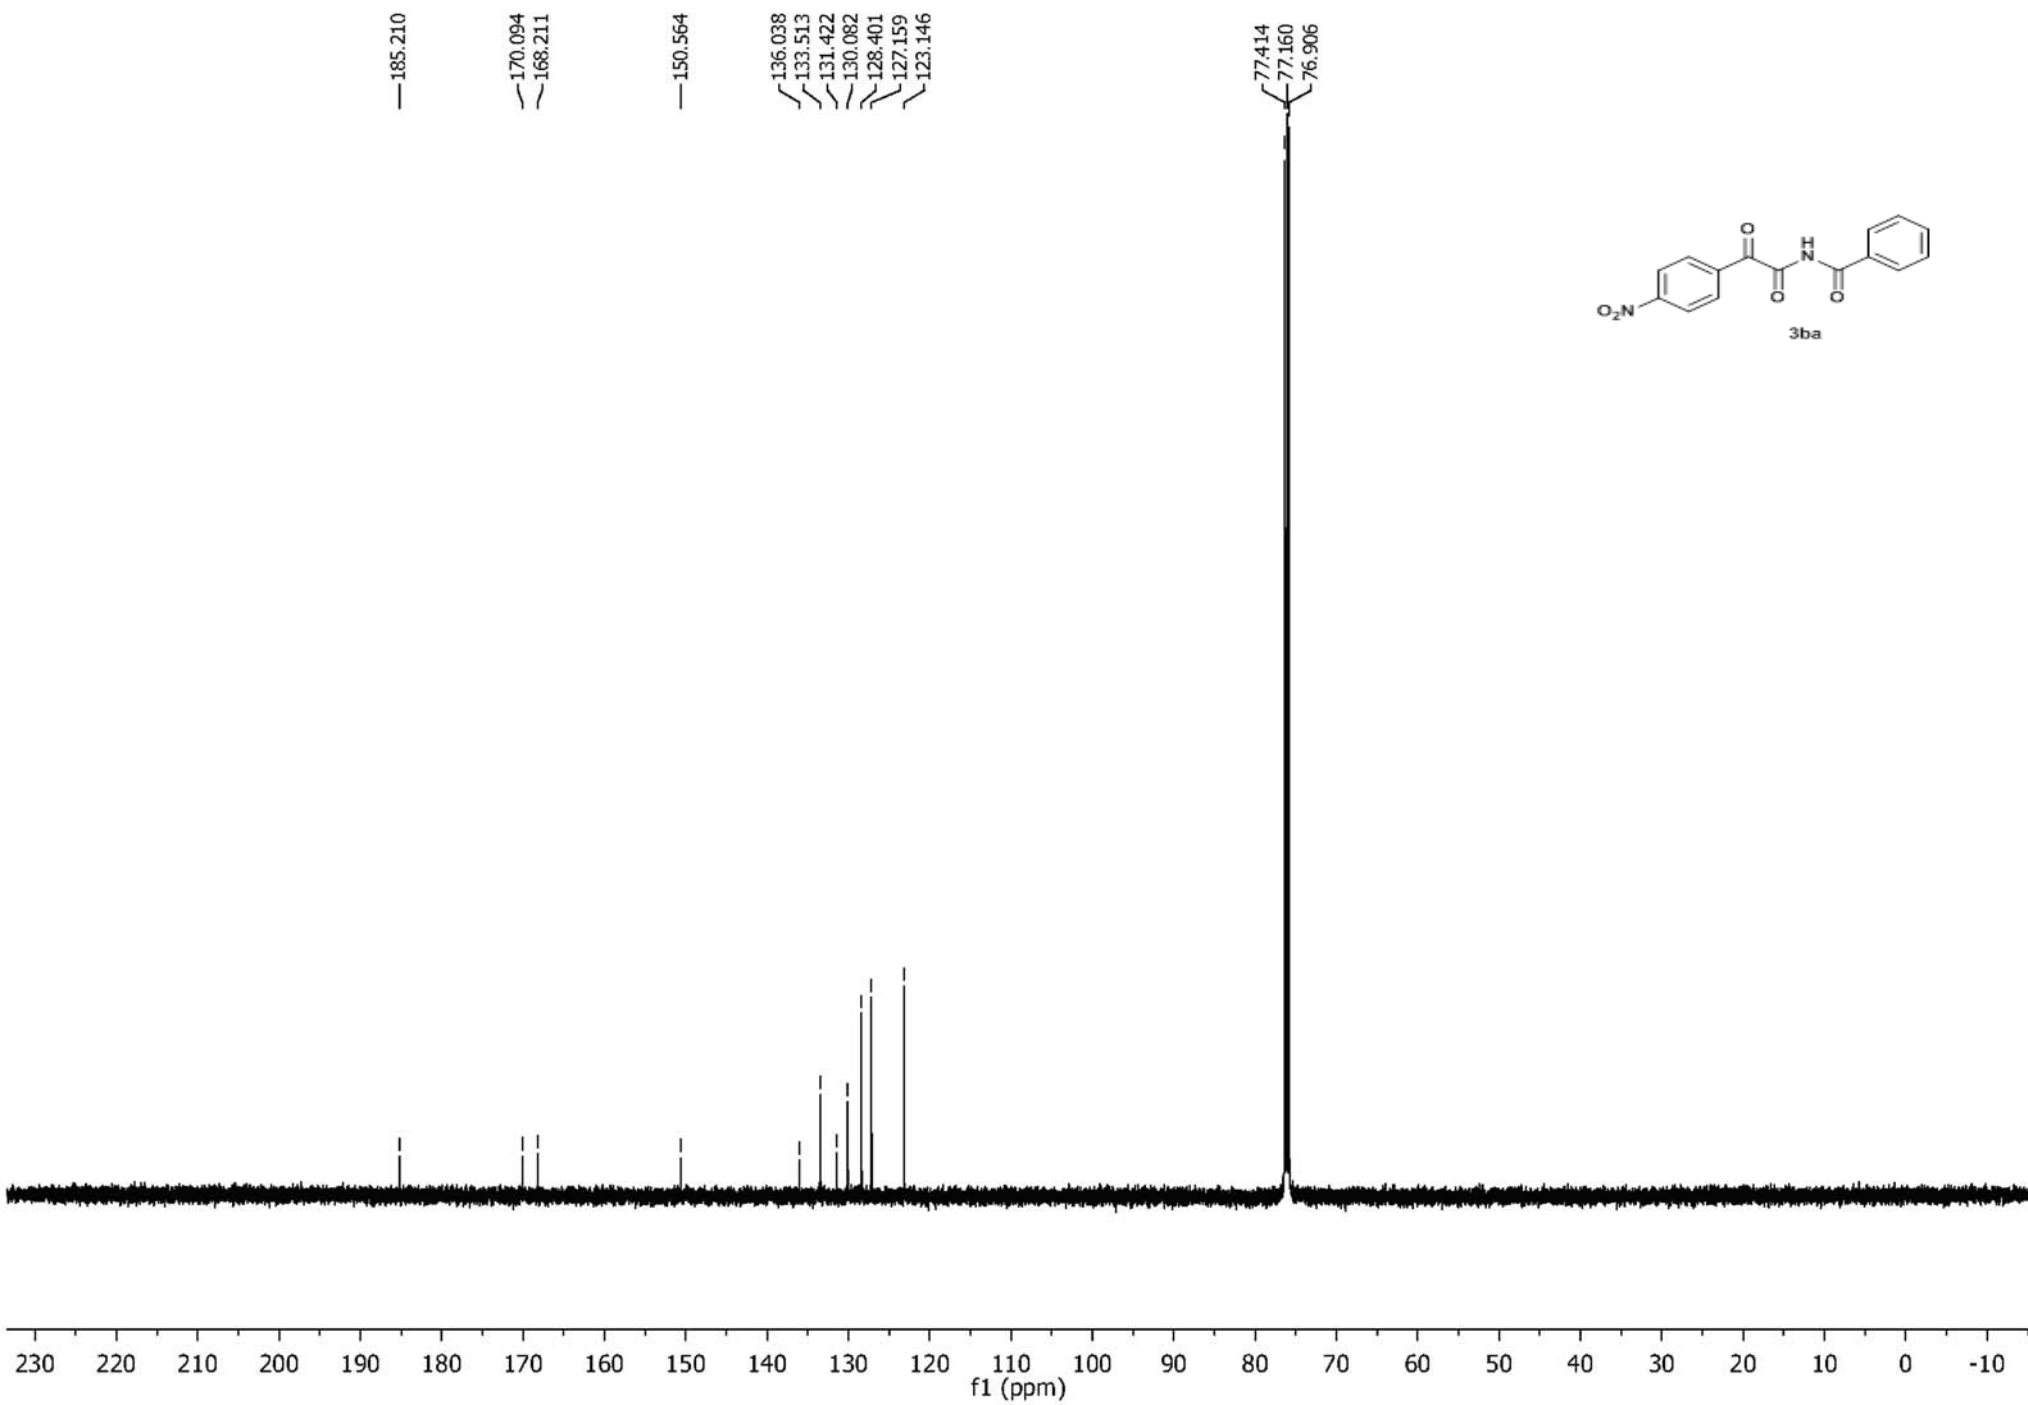

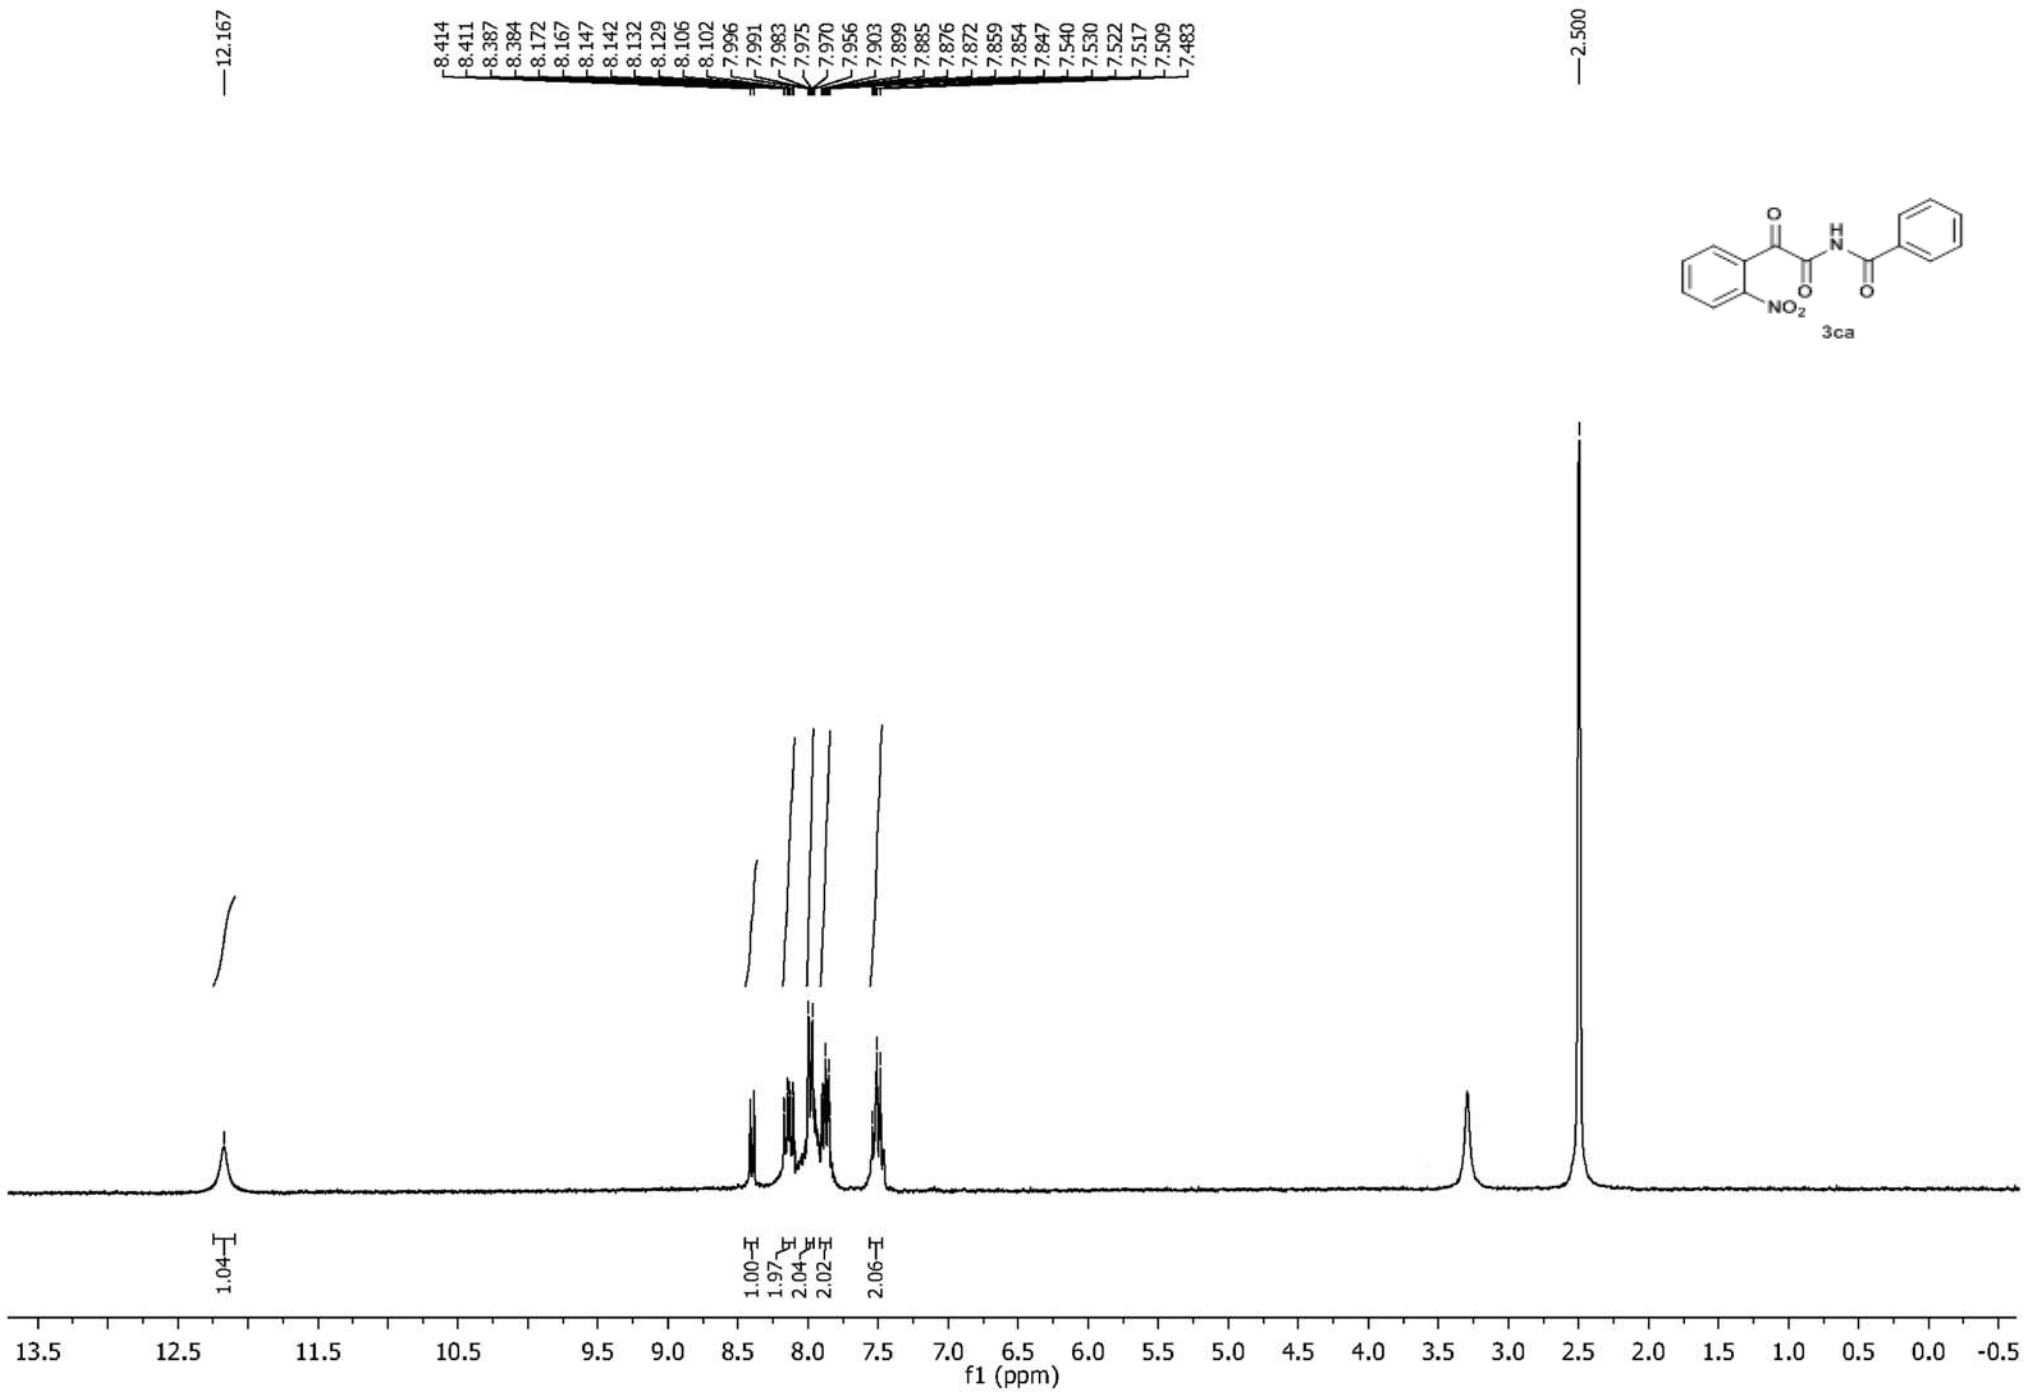

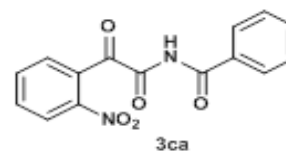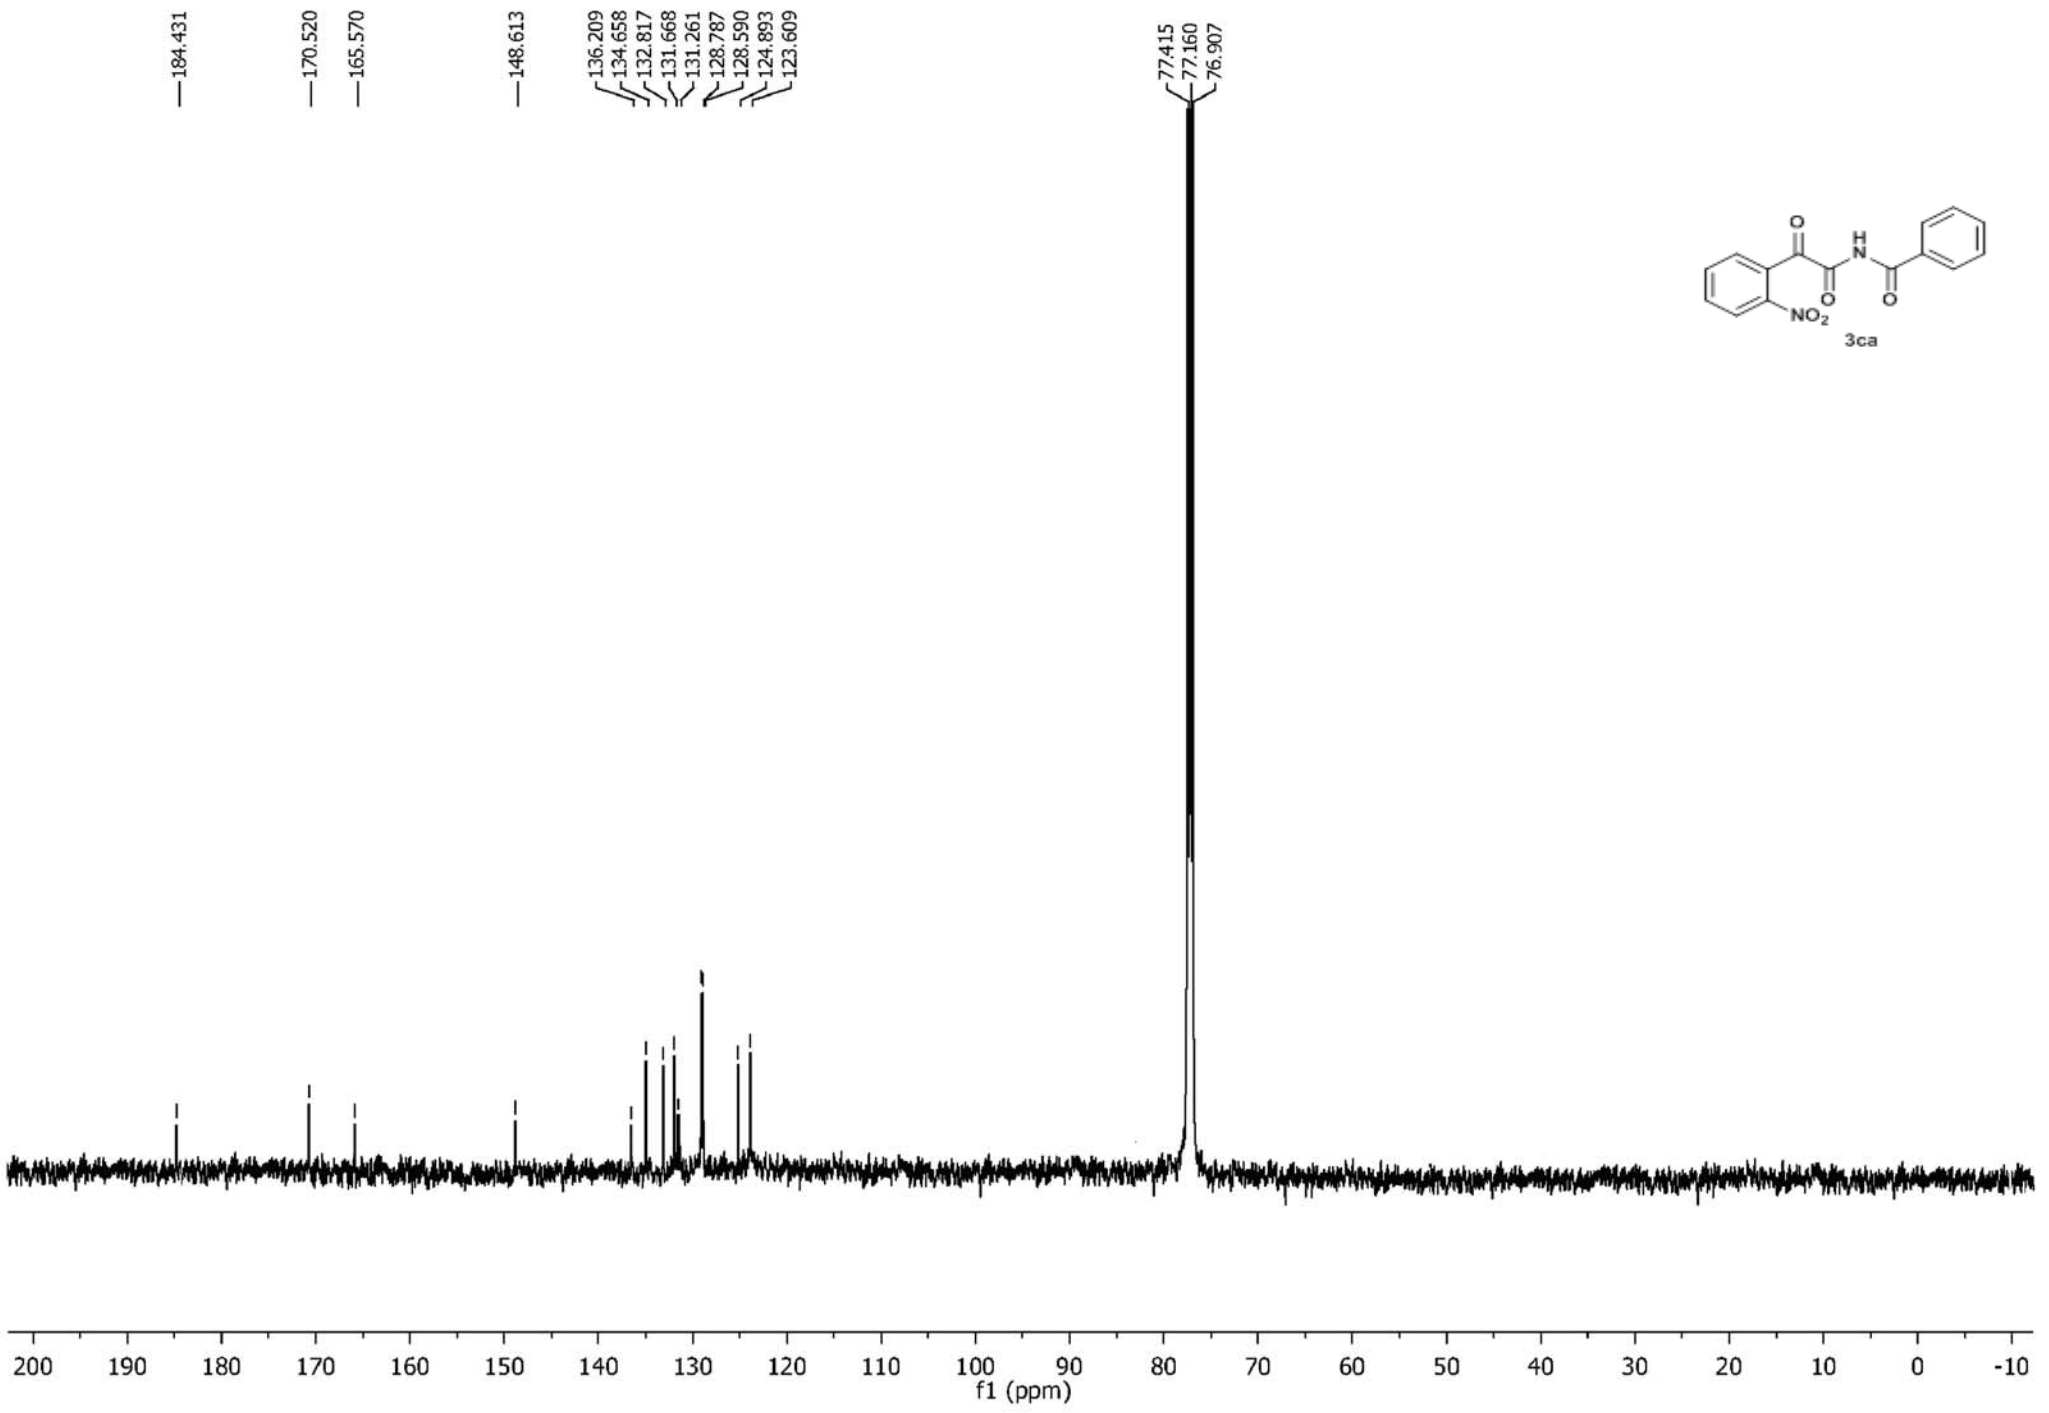

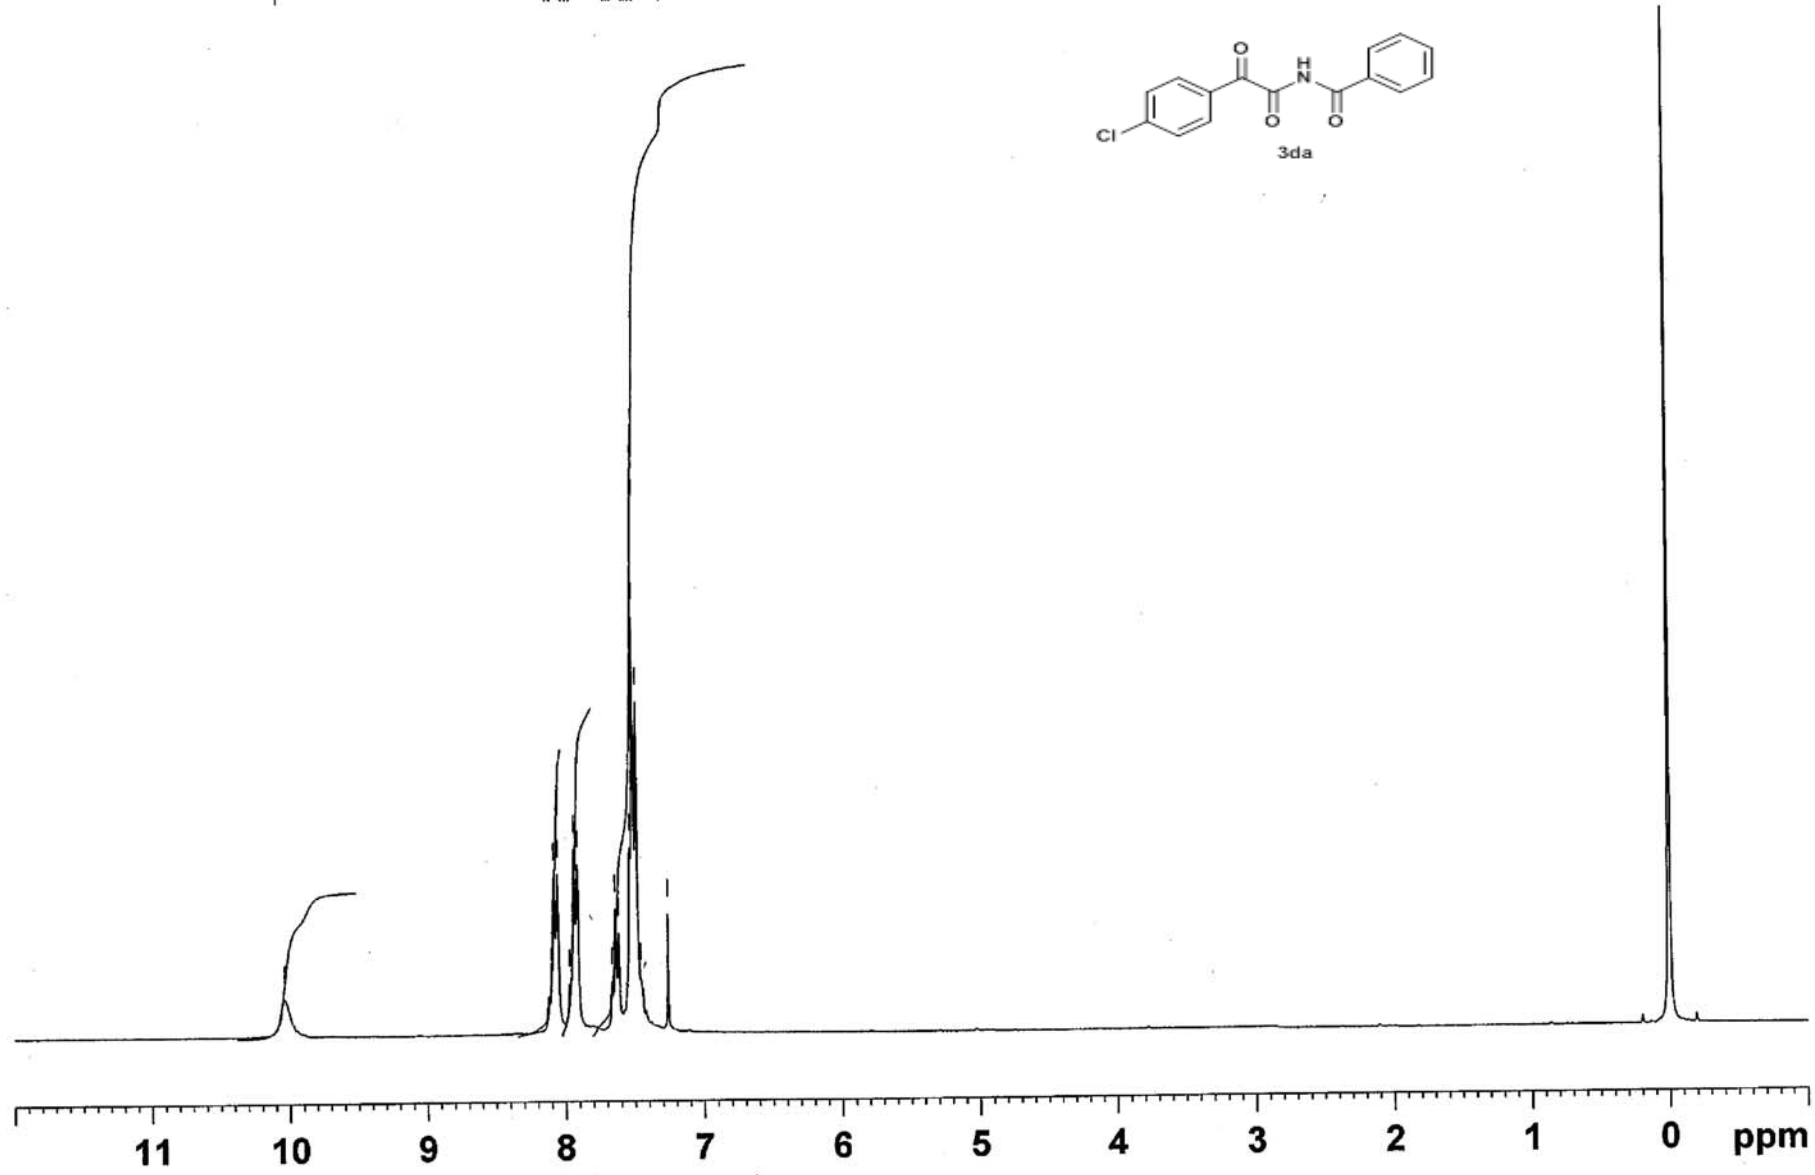

10.035  
8.081  
8.054  
7.965  
7.937  
7.912  
7.663  
7.639  
7.615  
7.531  
7.511  
7.484  
7.456  
7.260

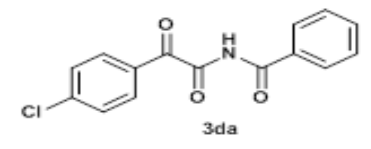

1.01  
2.00  
2.14  
5.37



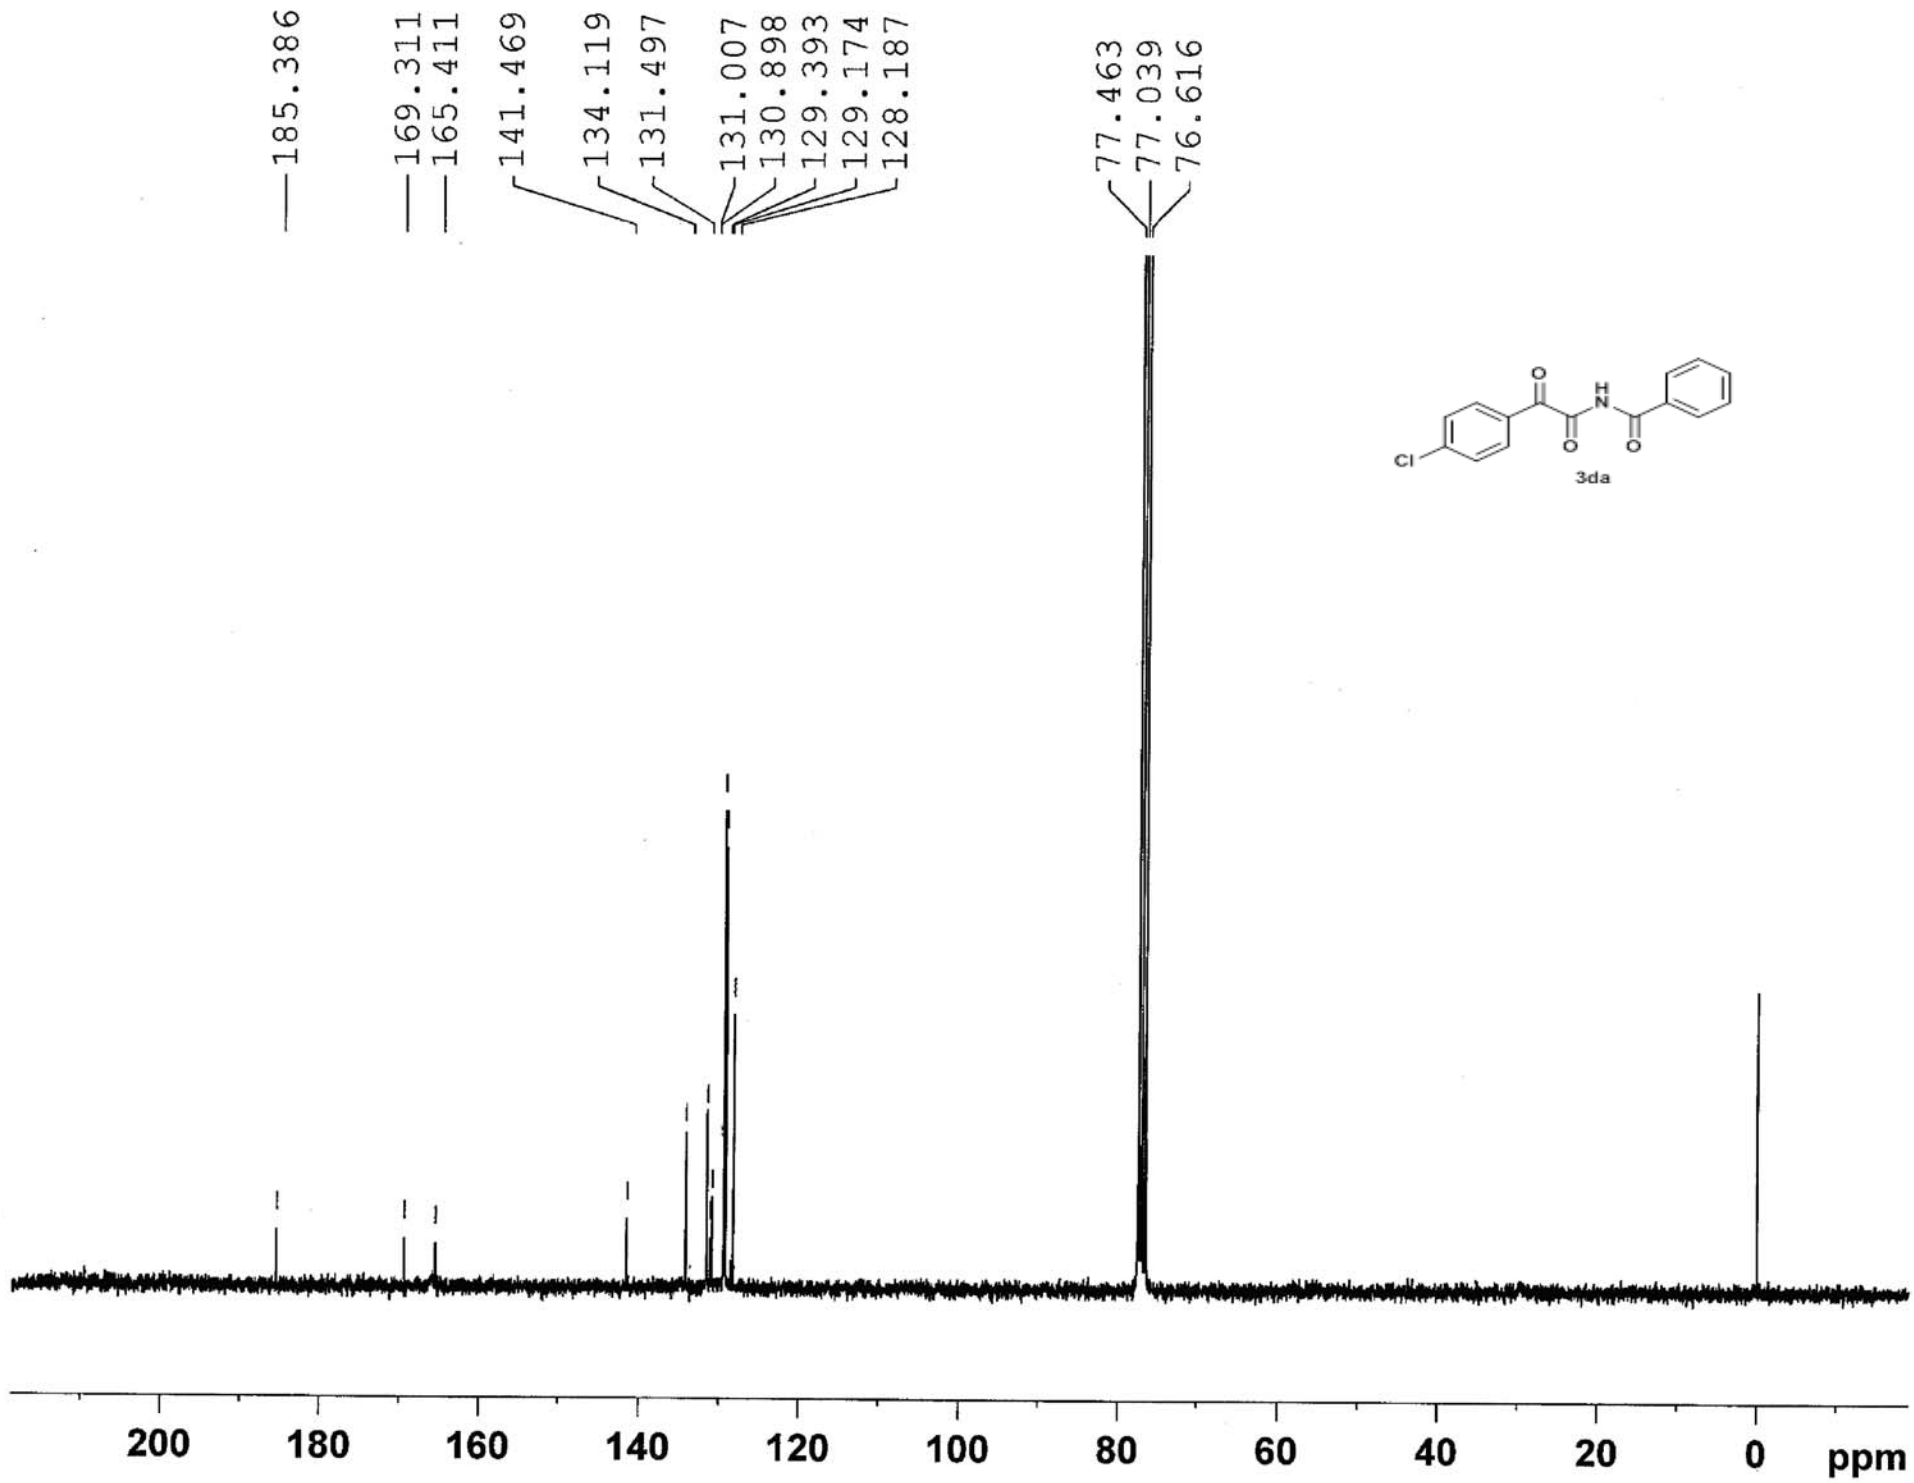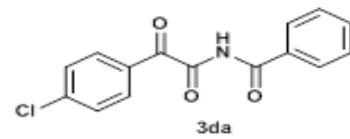

—9.667

8.038  
8.024  
7.901  
7.886  
7.693  
7.677  
7.658  
7.647  
7.543  
7.532  
7.260

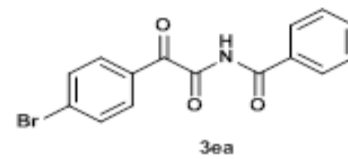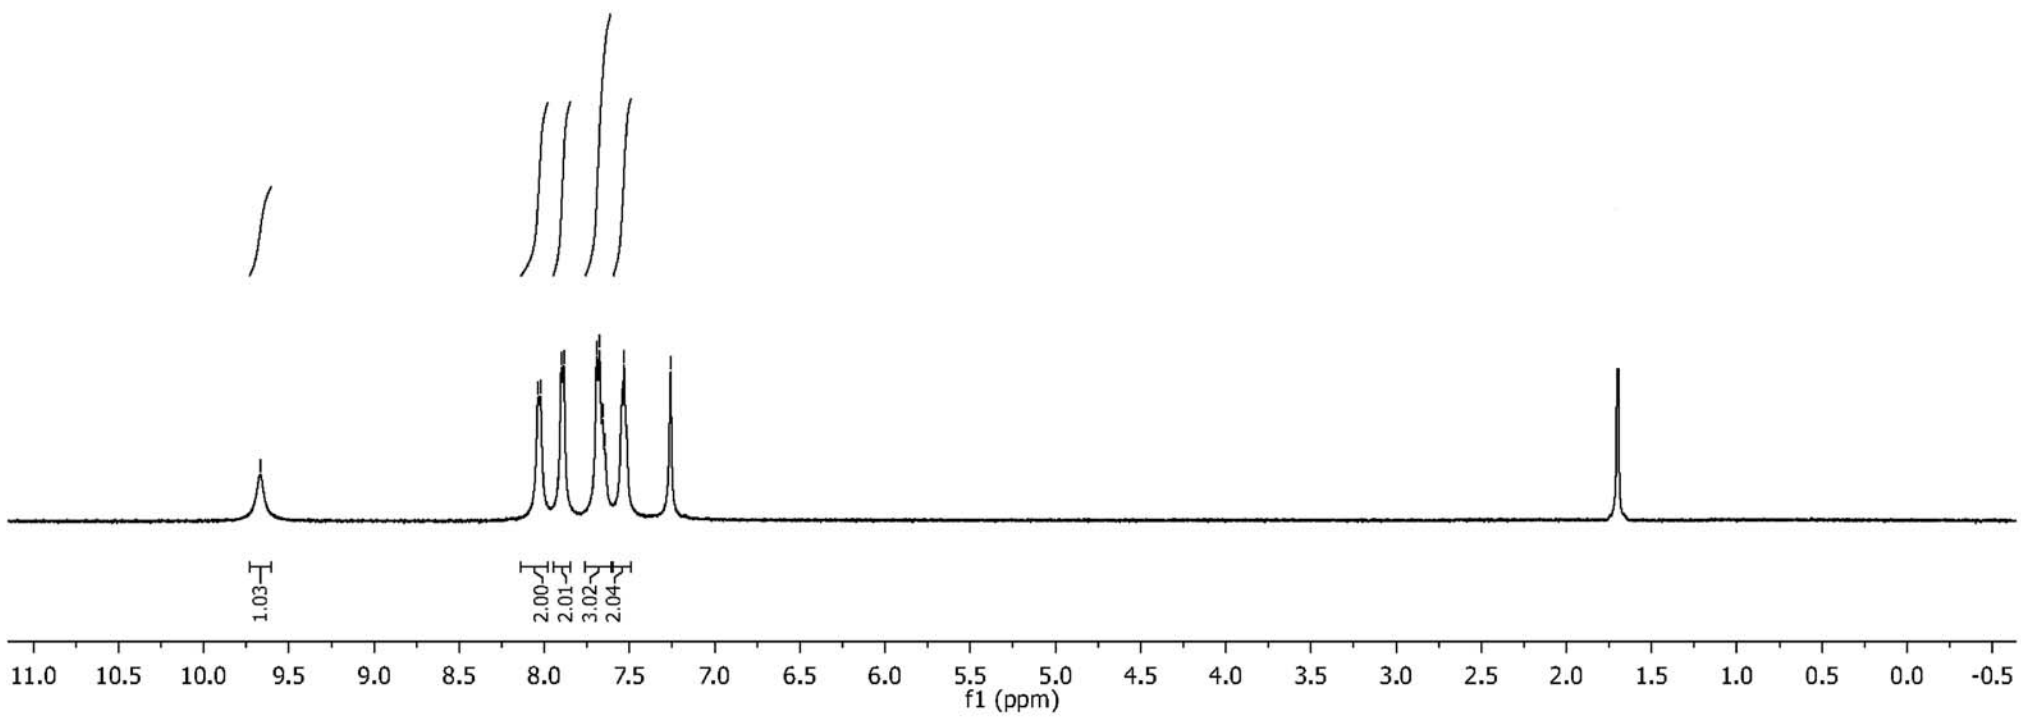

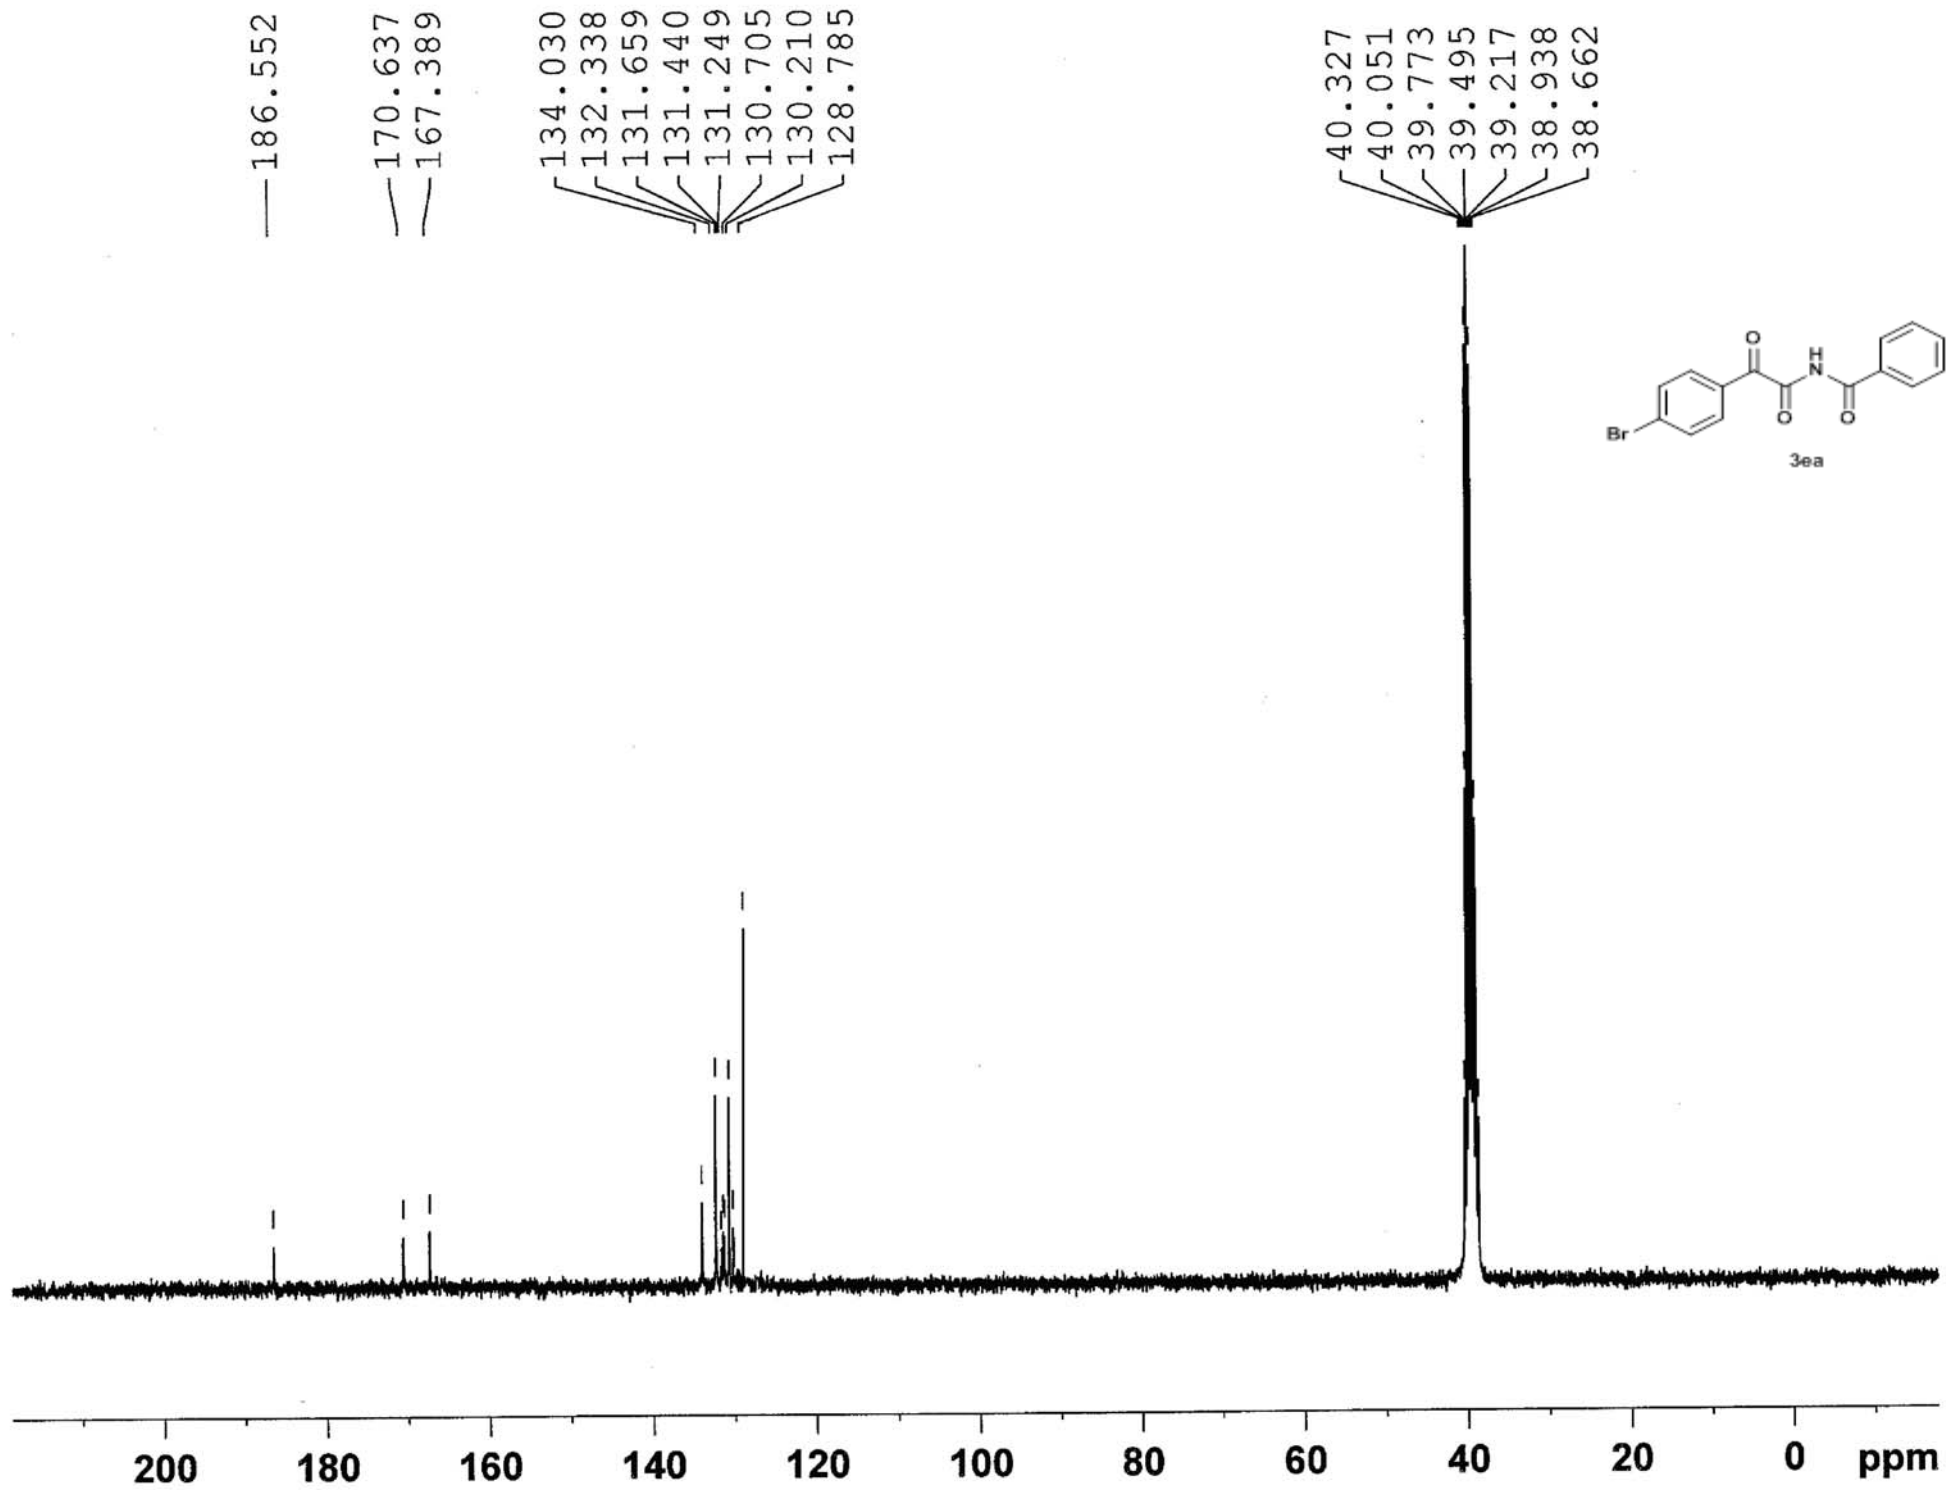

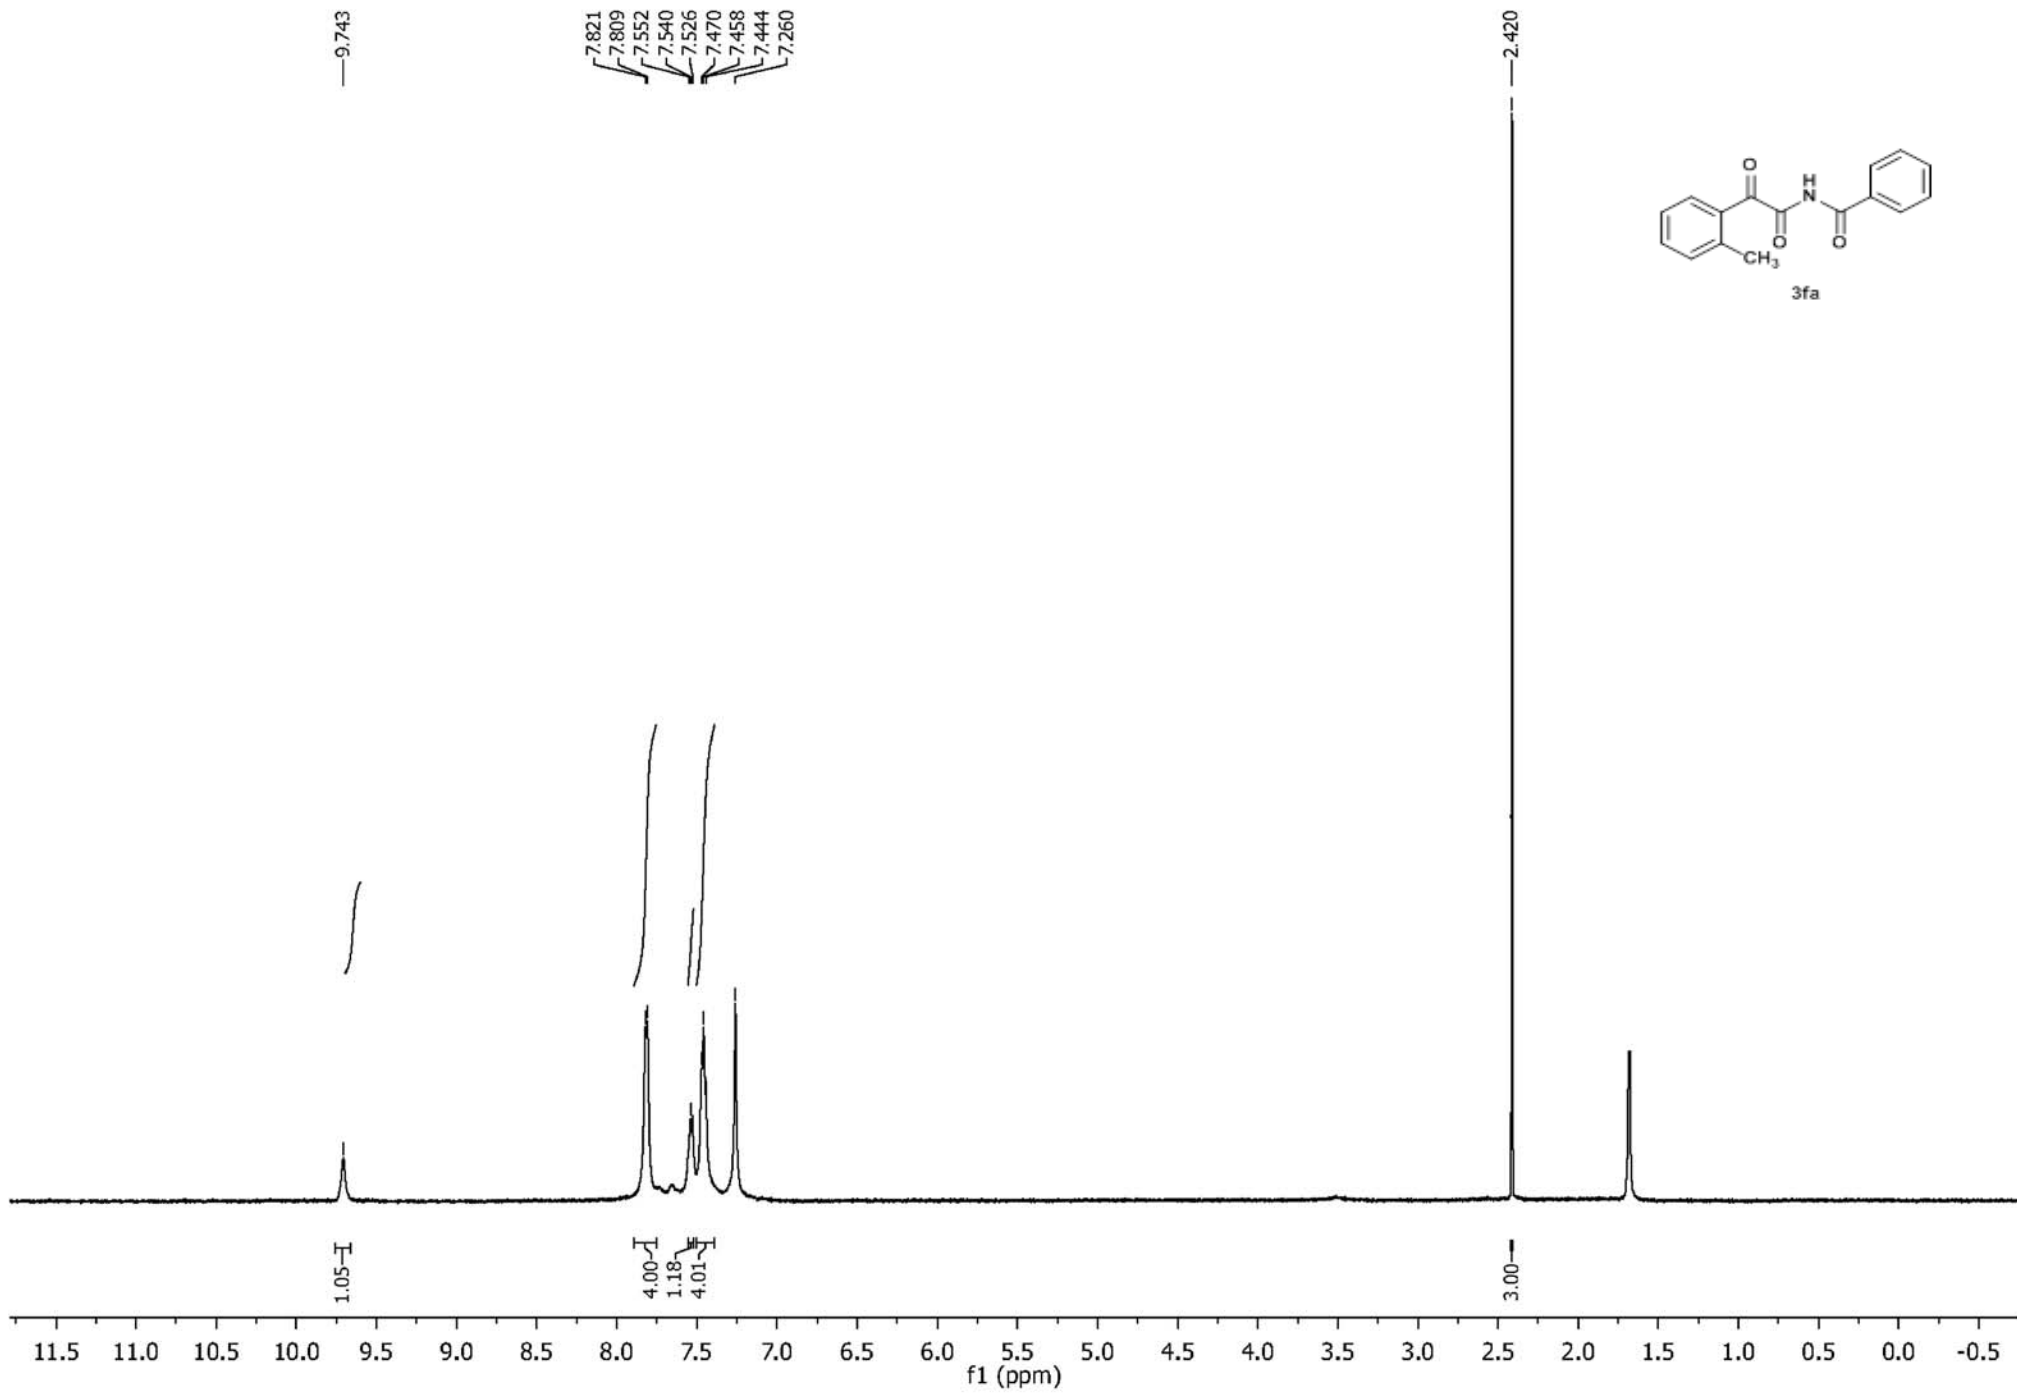

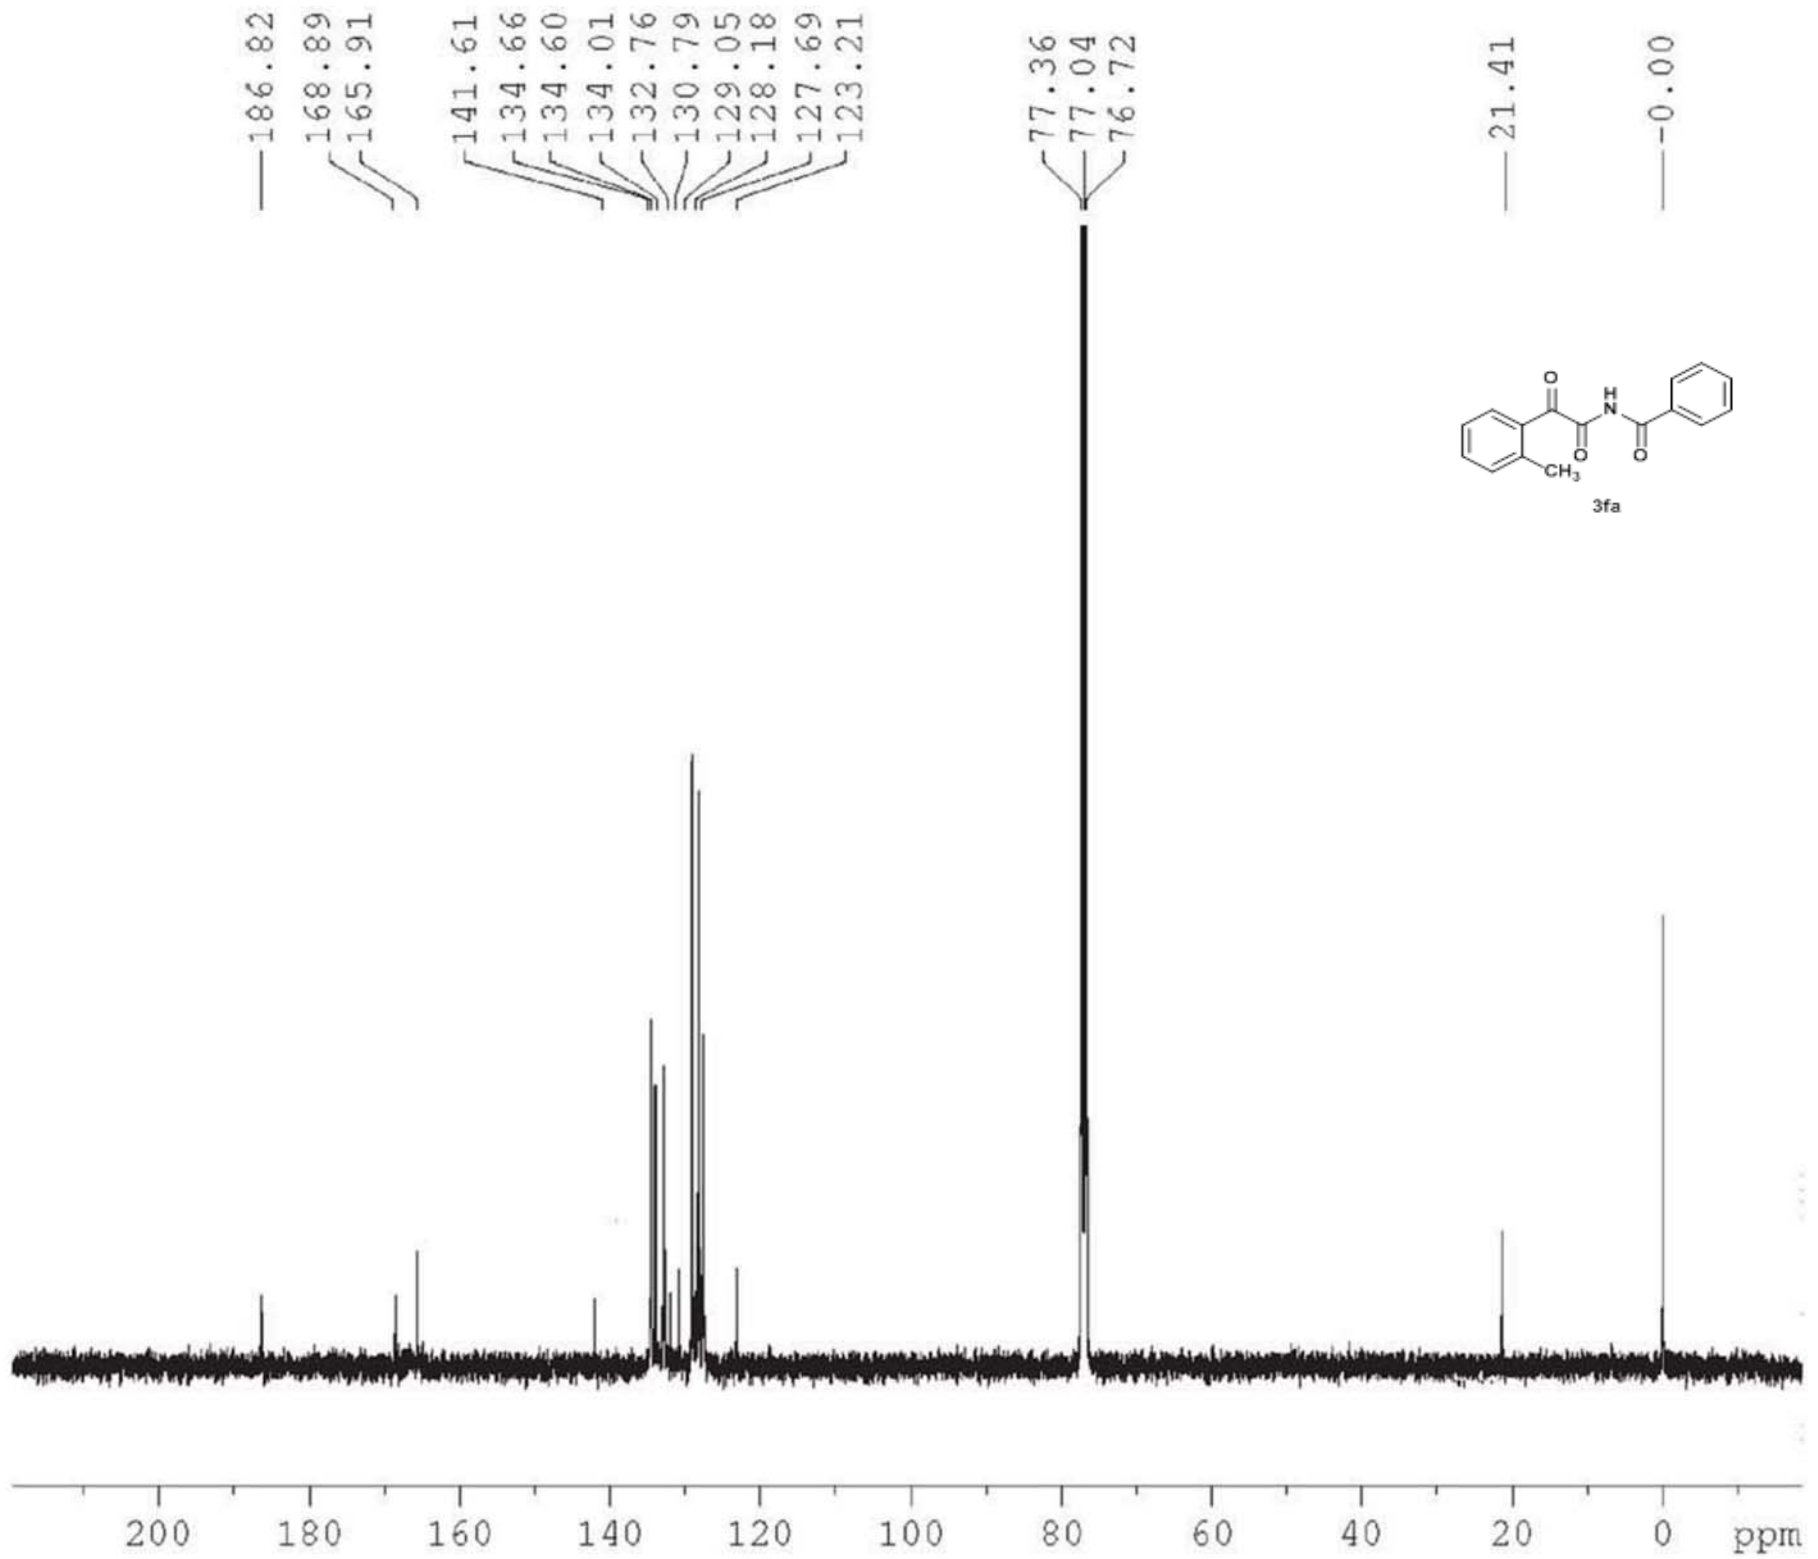

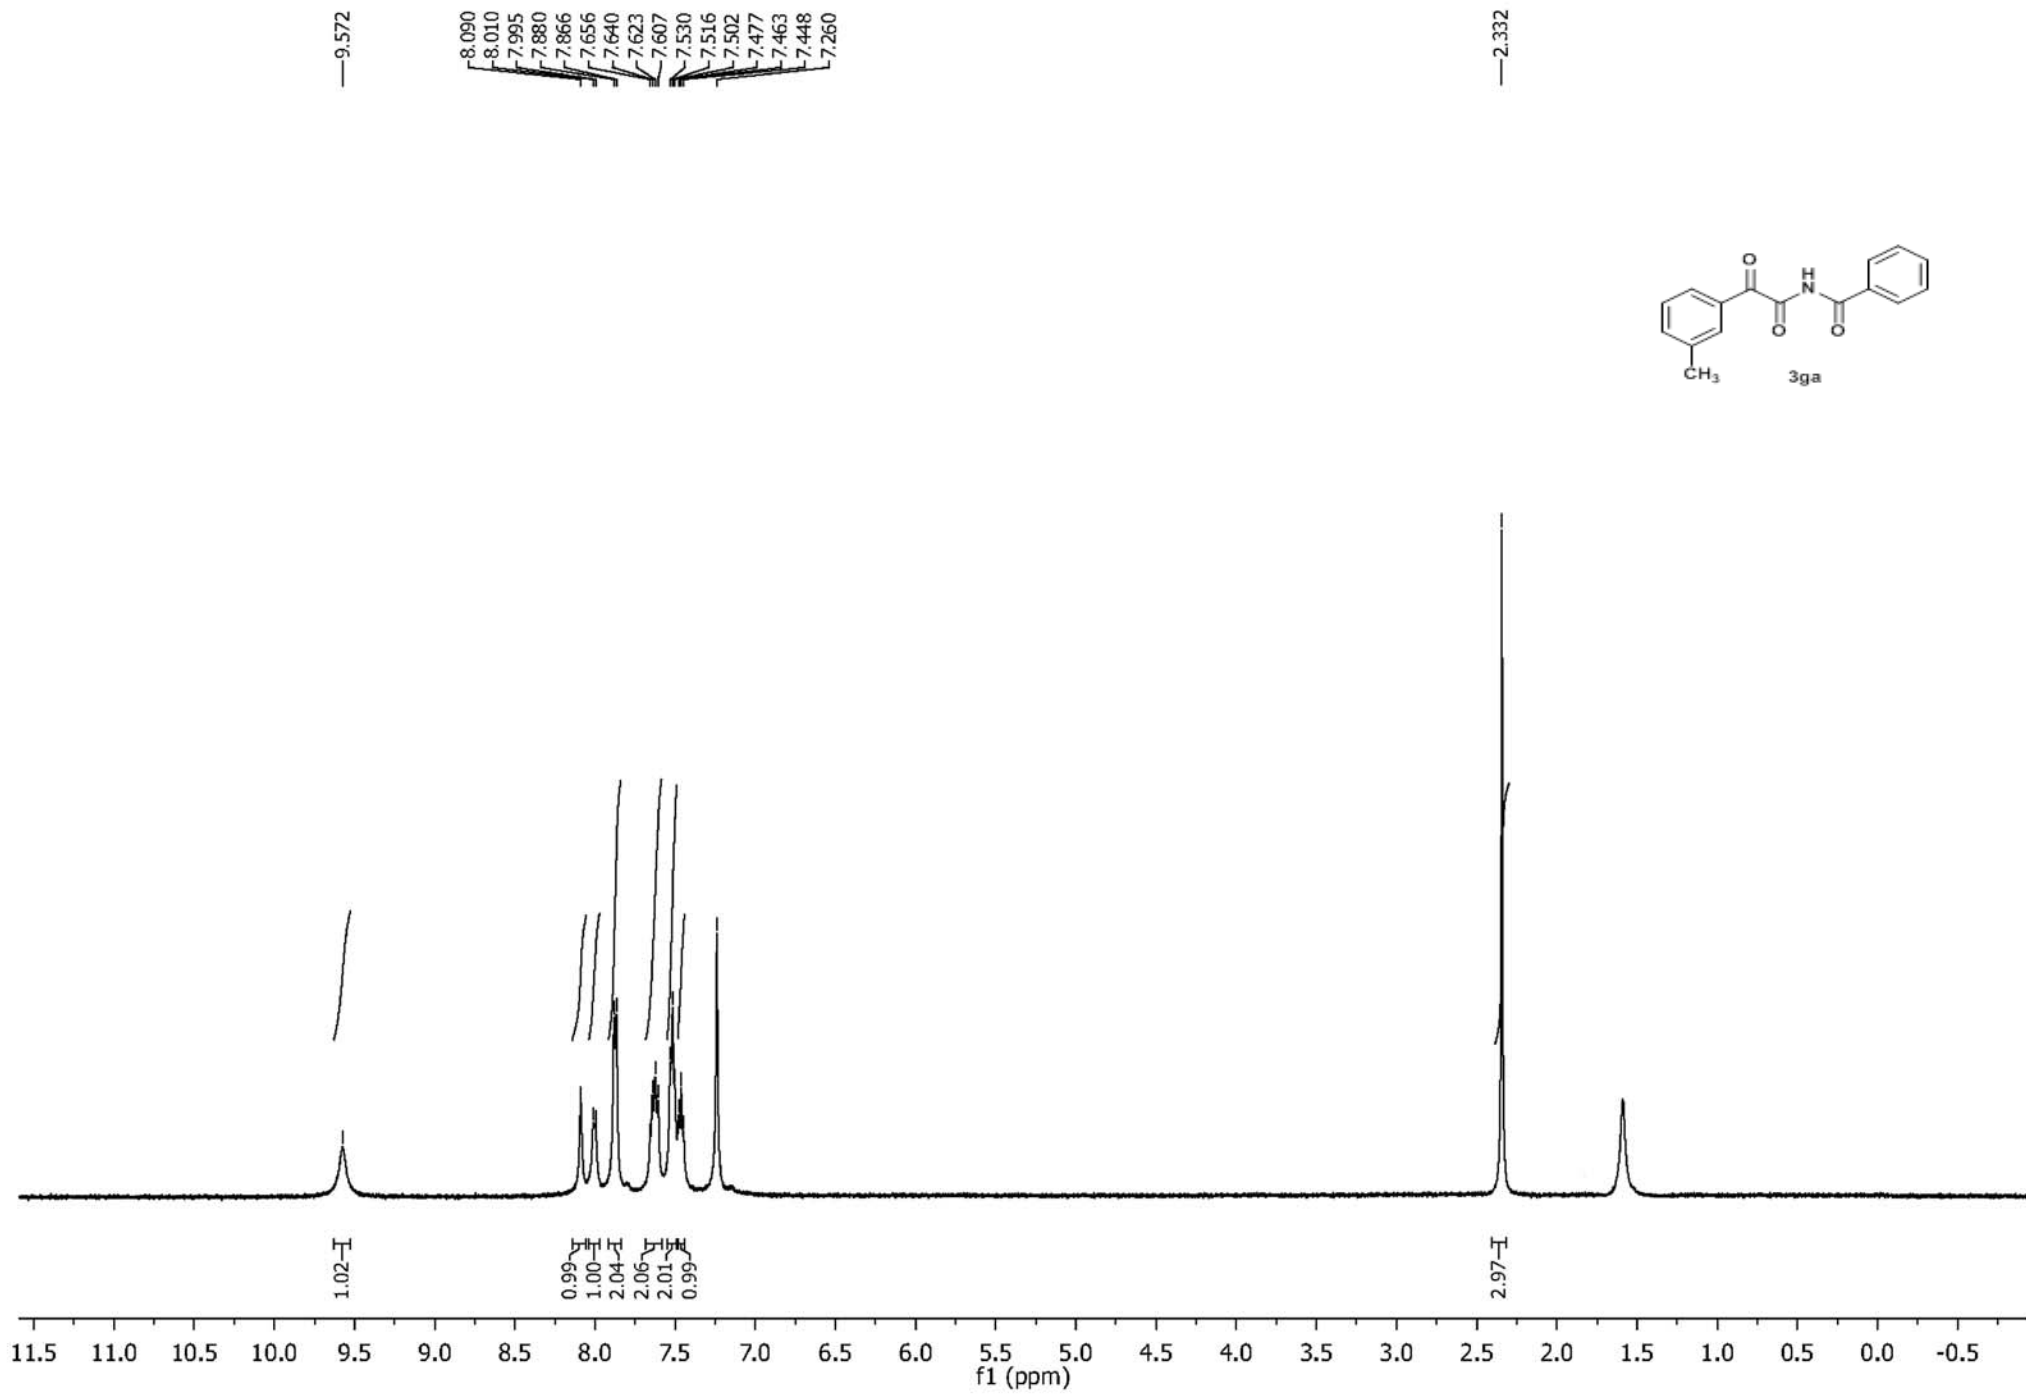

— 186.026

— 170.918

— 166.313

— 148.892

— 135.796

— 134.126

— 132.652

— 131.310

— 129.300

— 128.939

— 128.364

— 128.284

— 127.744

— 77.413

— 77.160

— 76.906

— 21.438

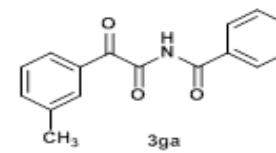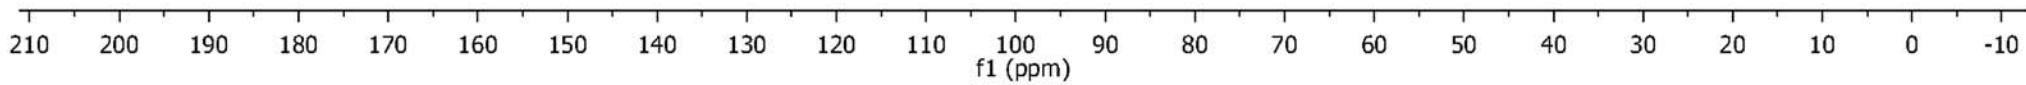

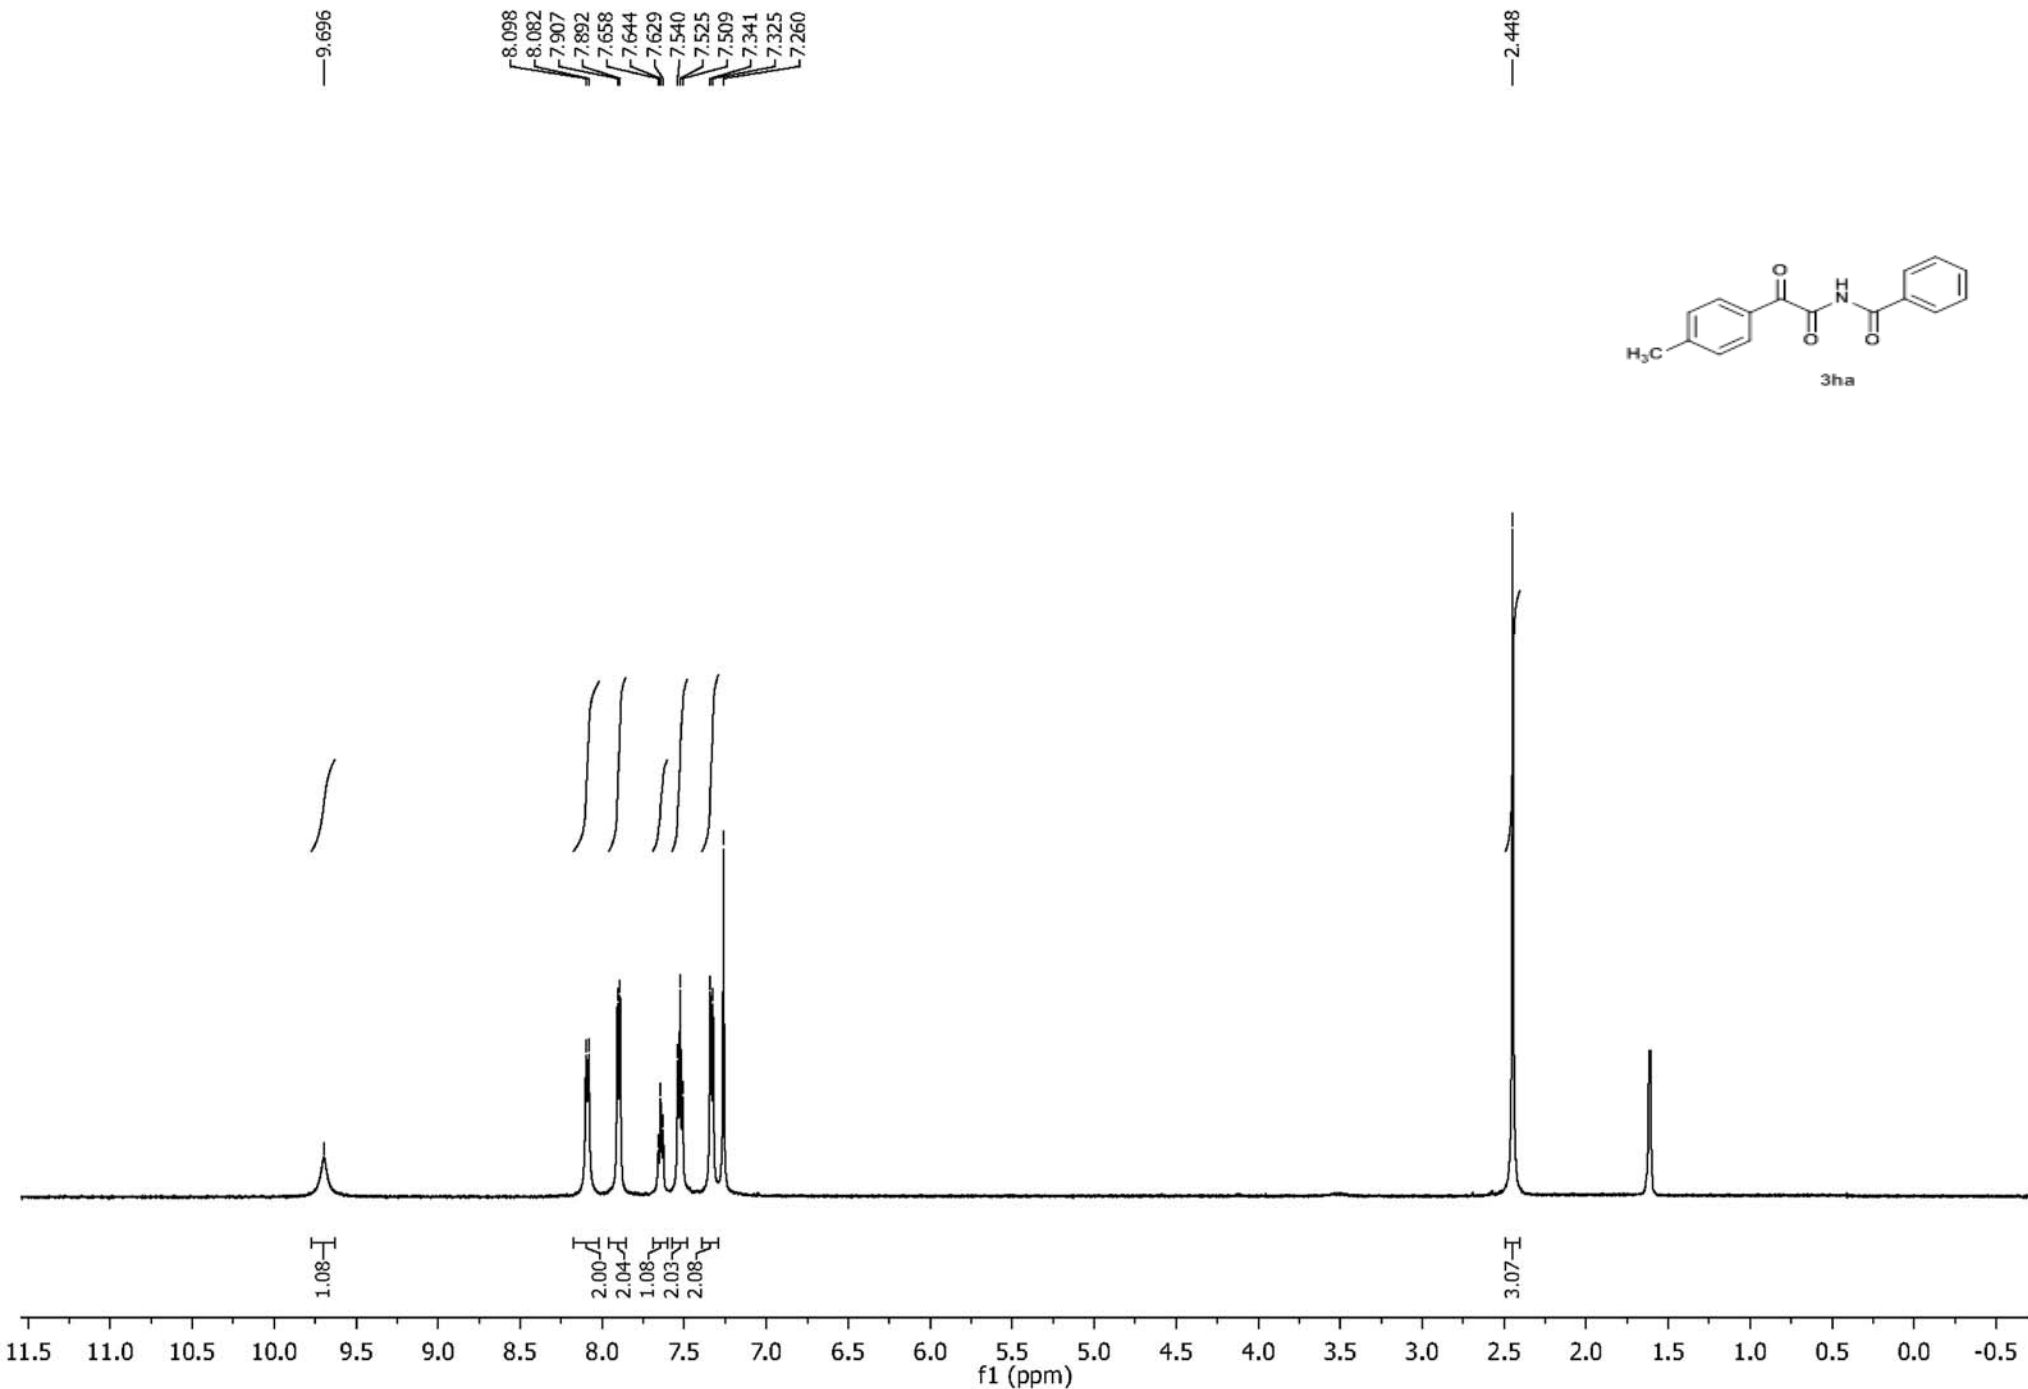



— 187.247

— 171.071

— 167.086

— 145.004

— 133.898

— 130.436

— 129.966

— 129.681

— 128.974

— 128.746

40.327

40.048

39.771

39.492

39.215

38.937

38.659

21.291

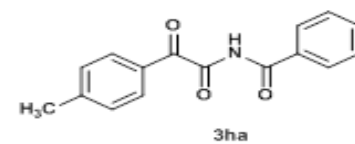

200 180 160 140 120 100 80 60 40 20 0 ppm

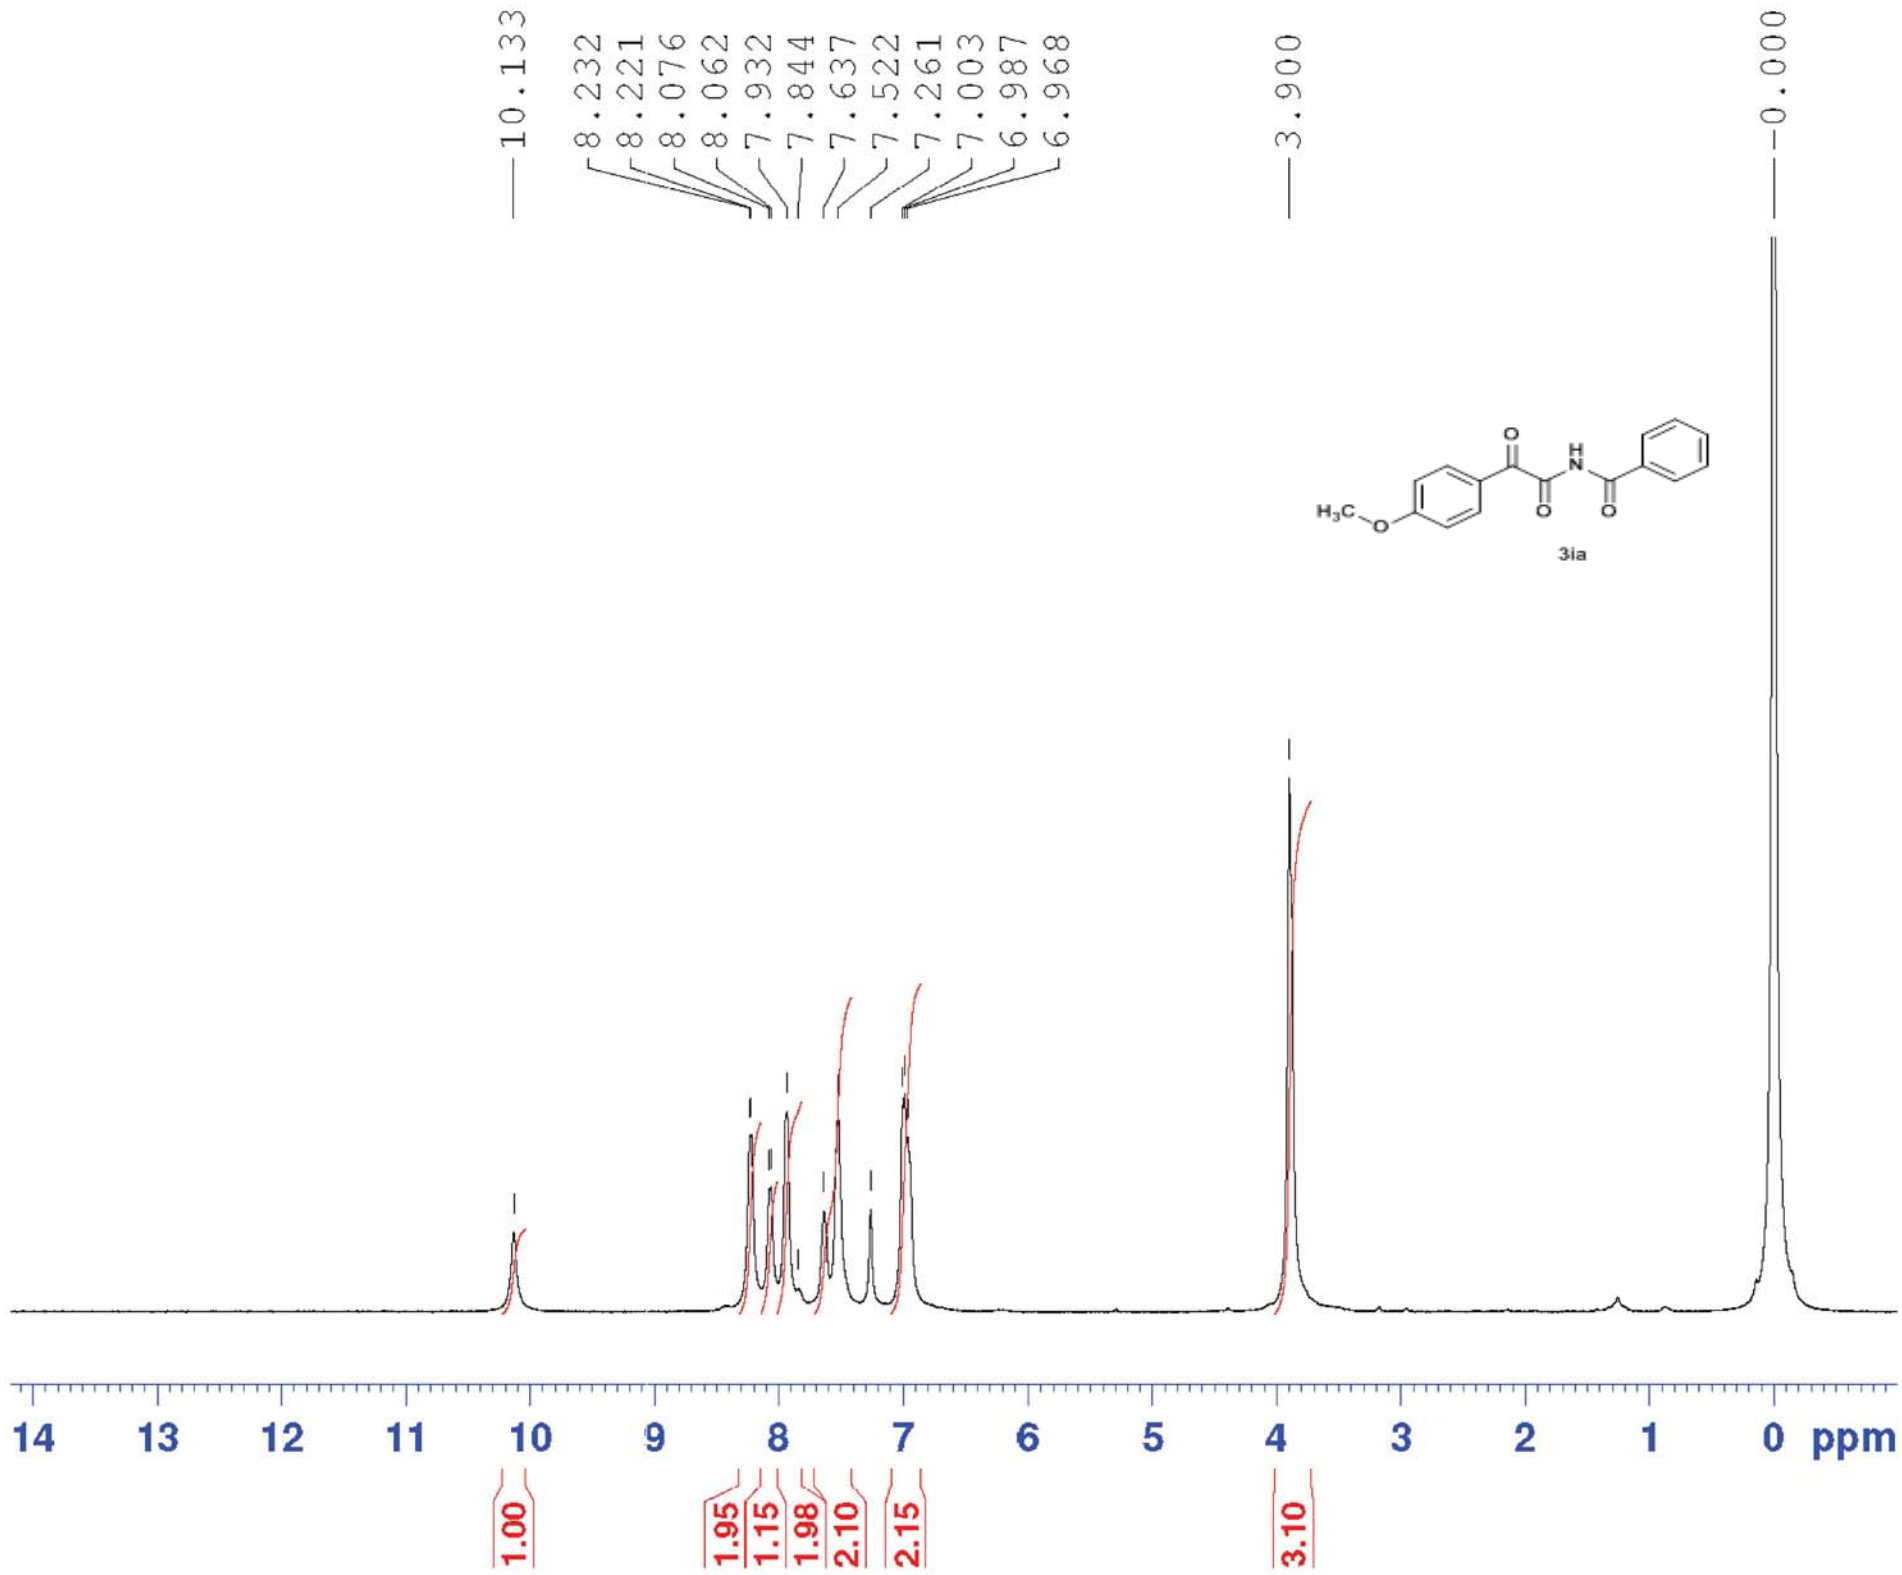

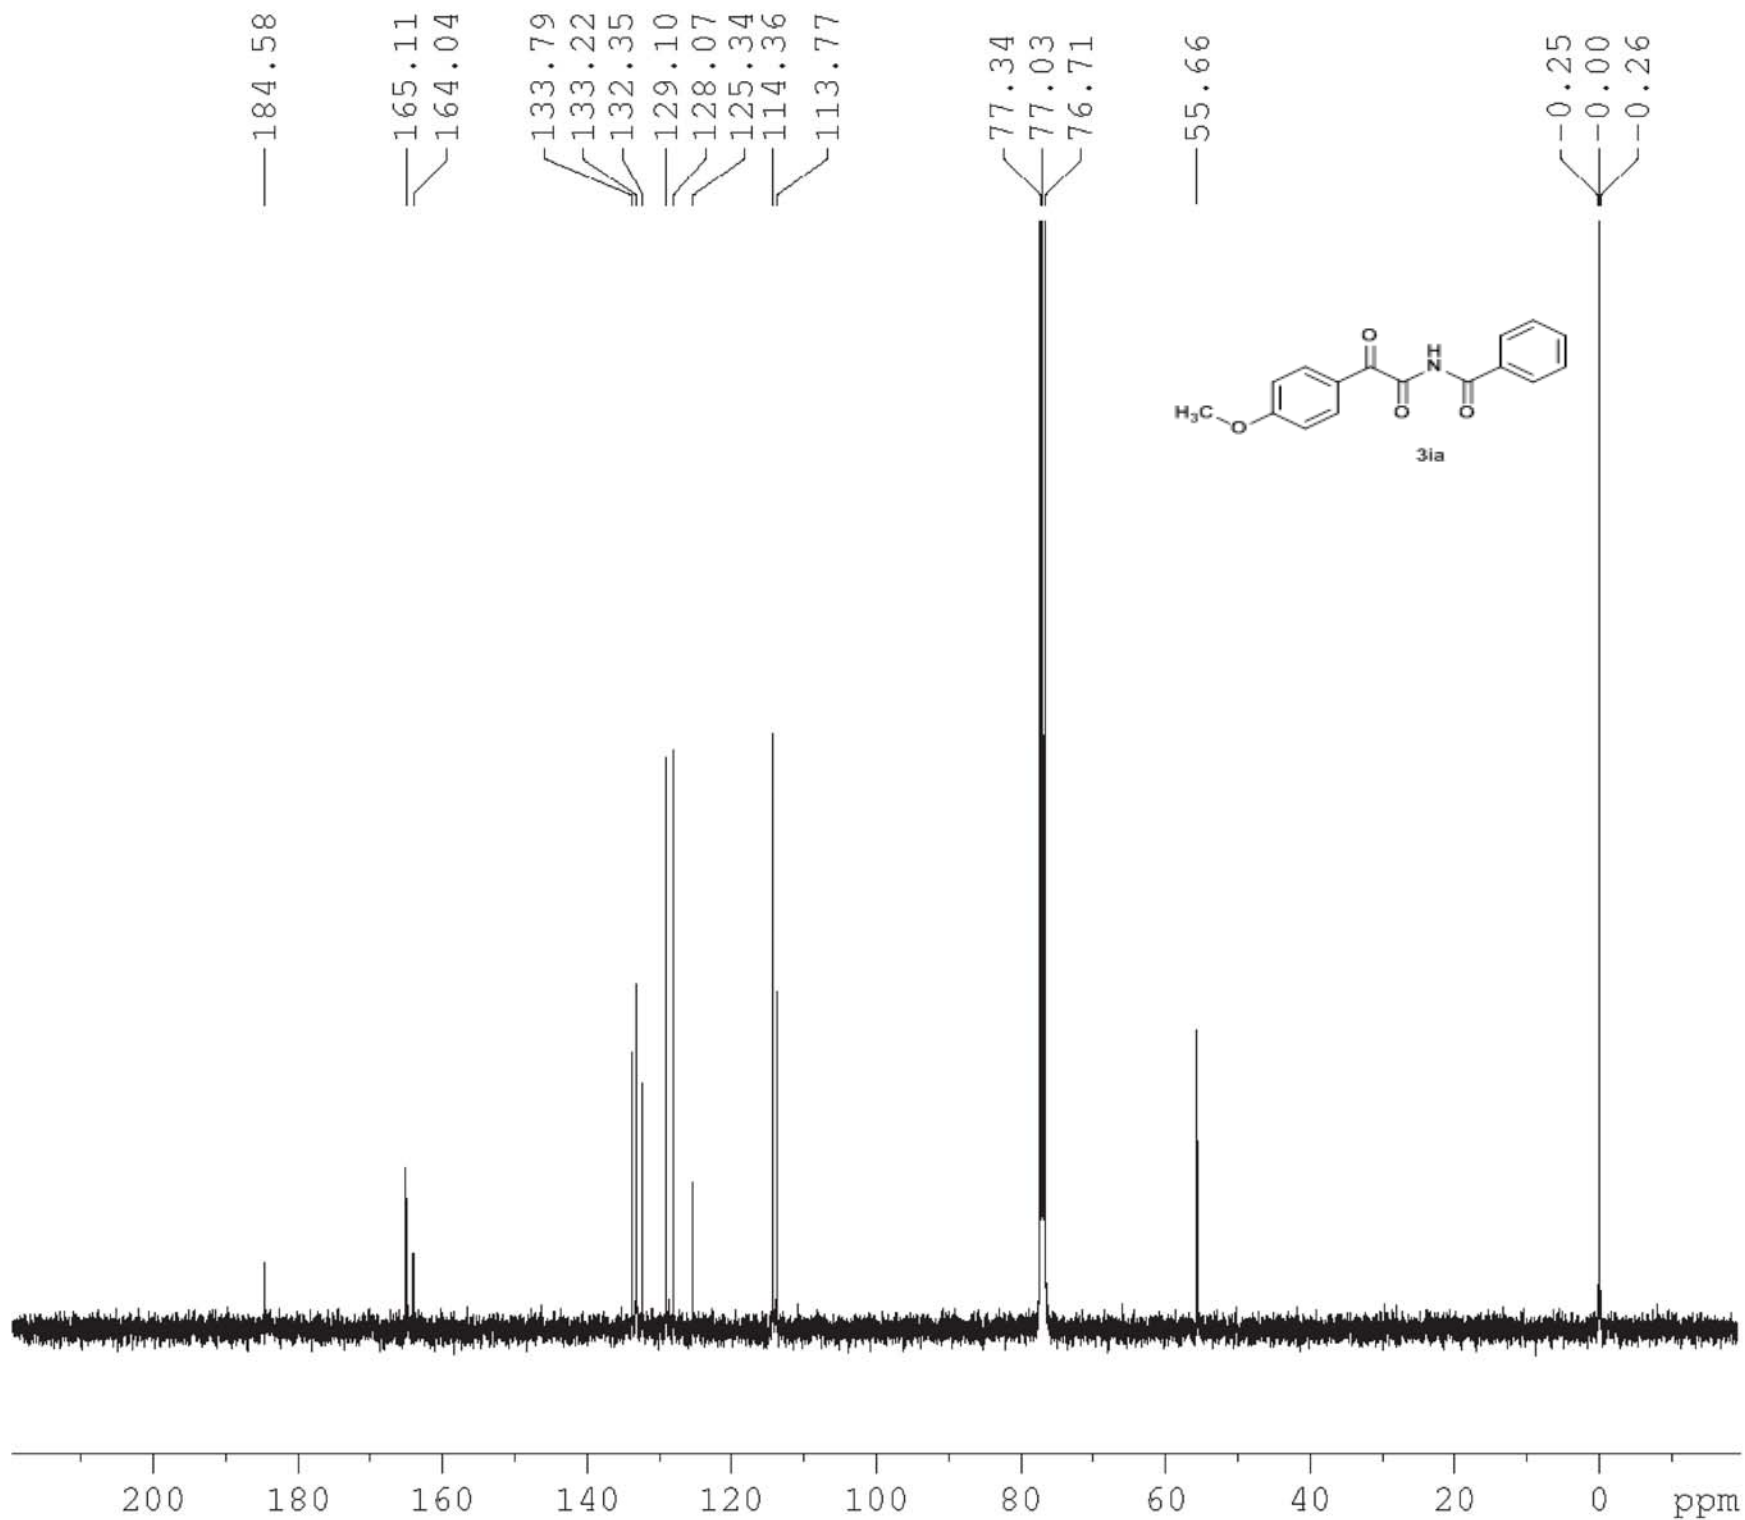

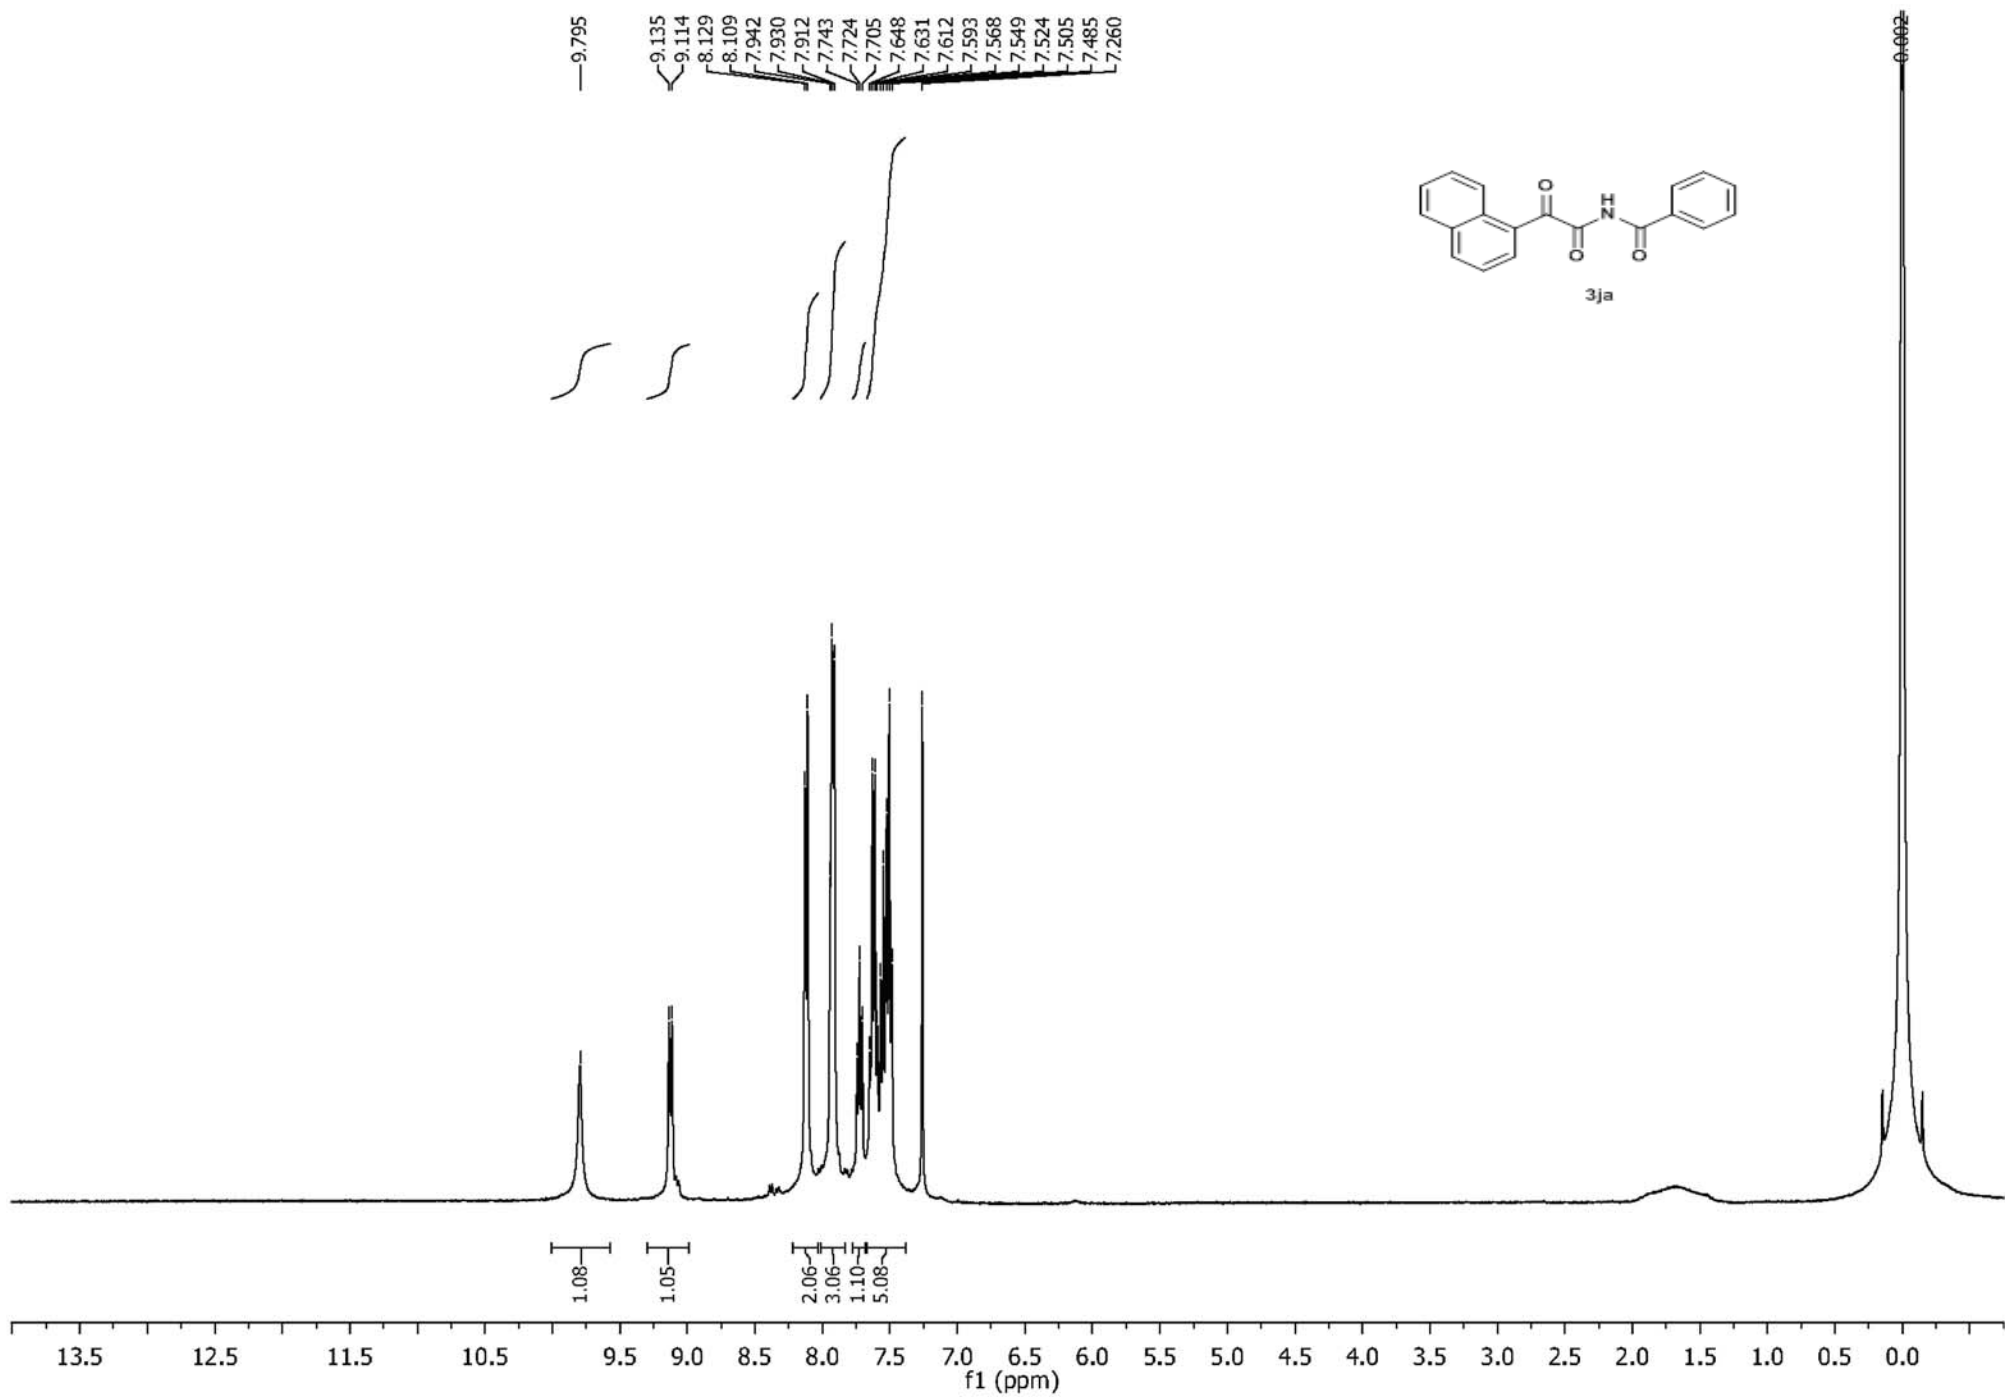

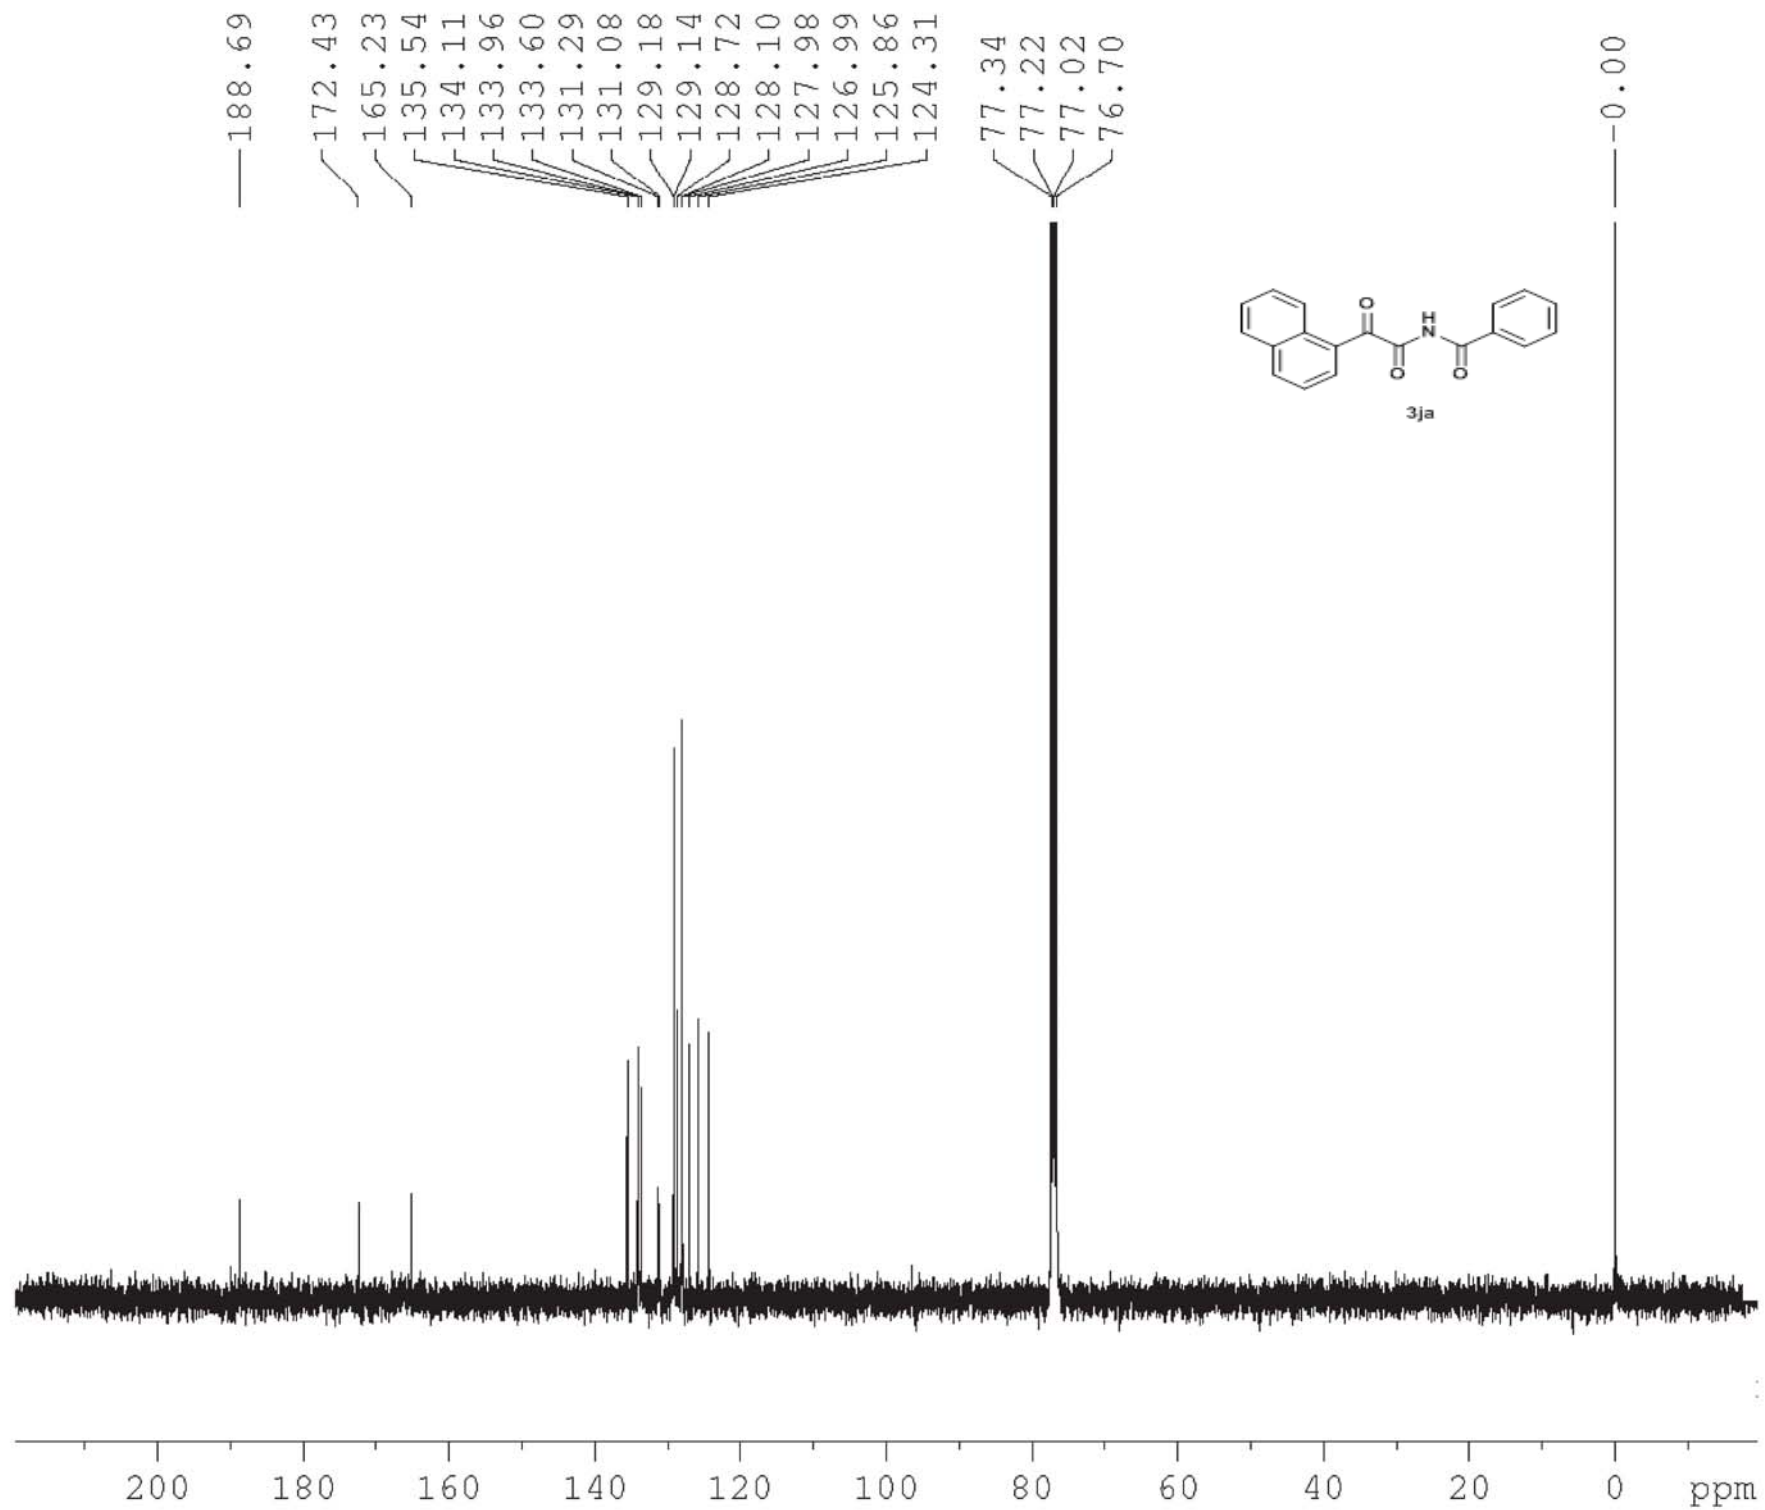

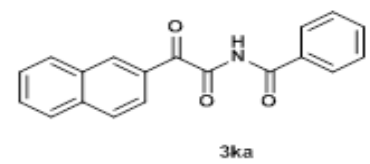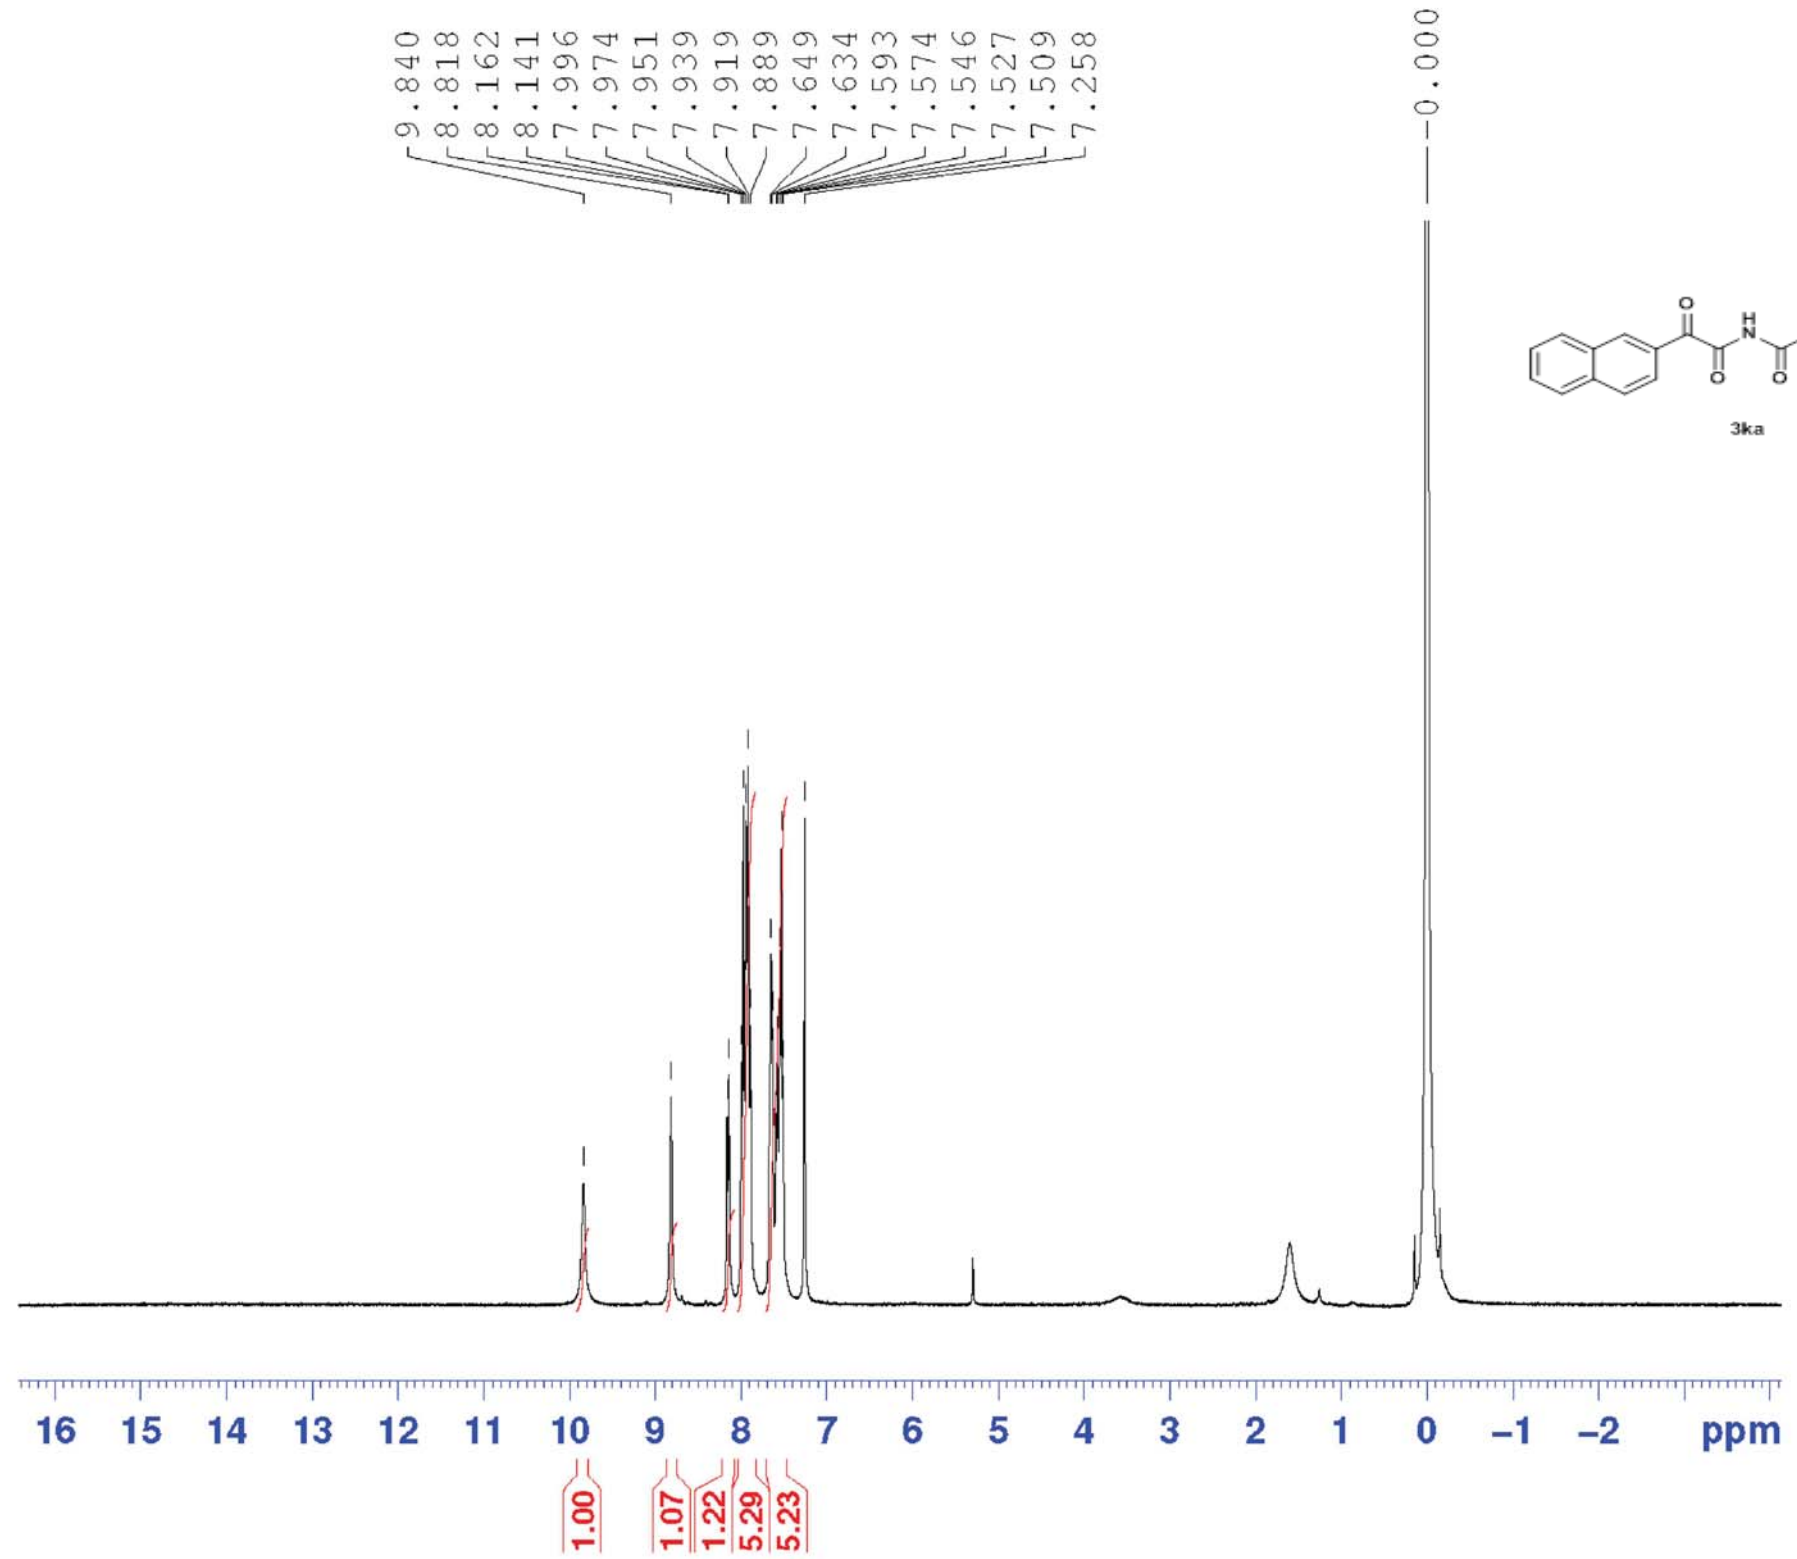

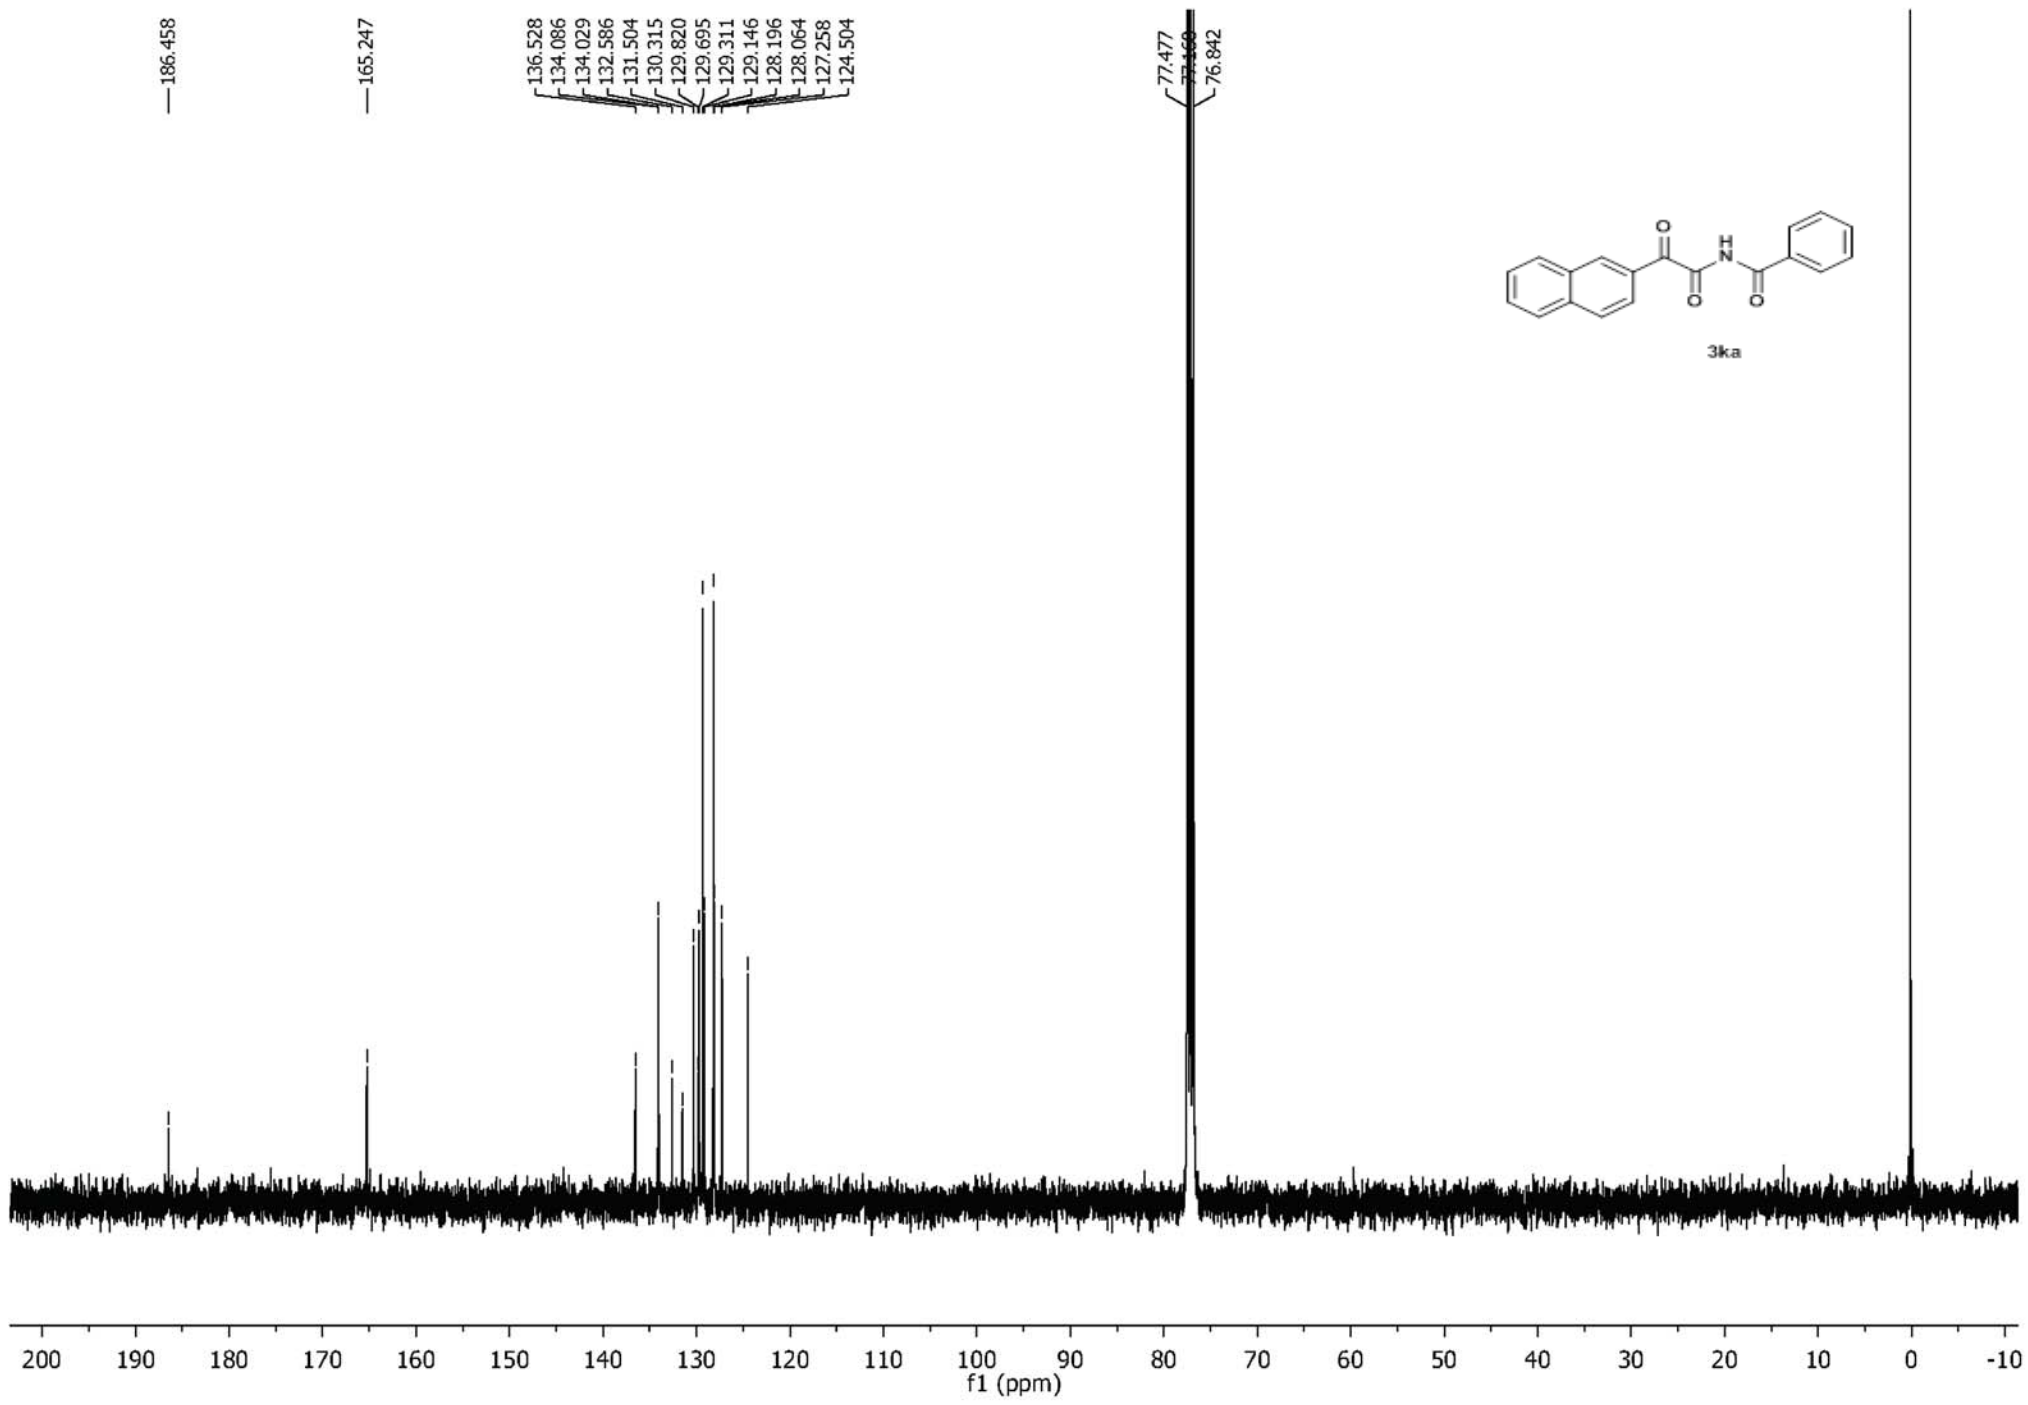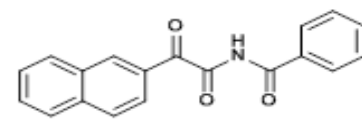

3ka

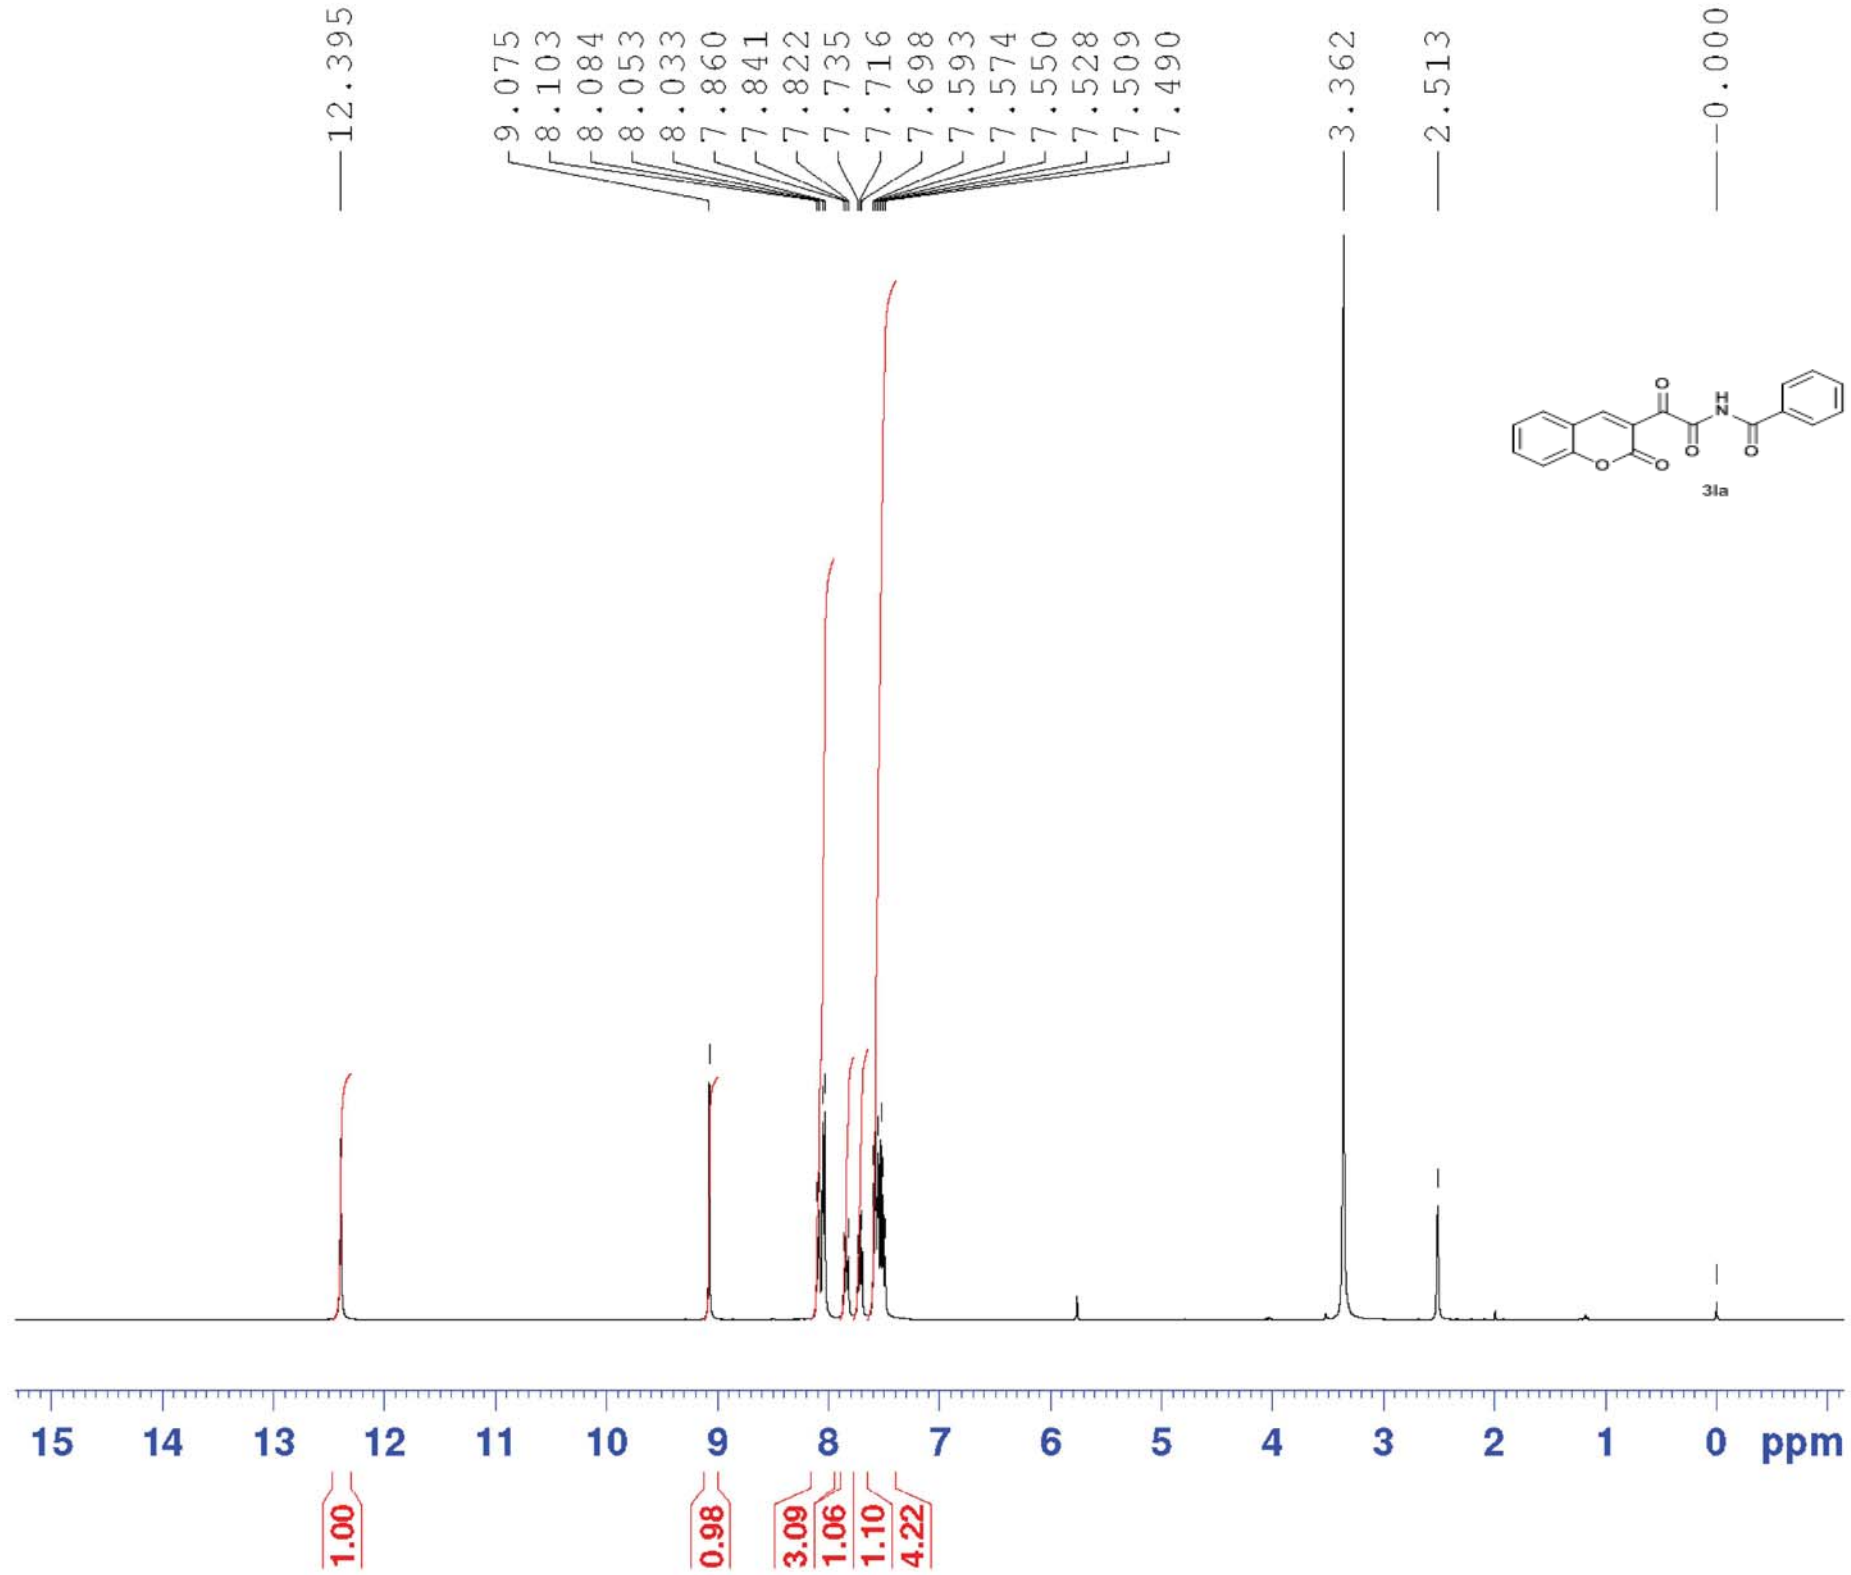



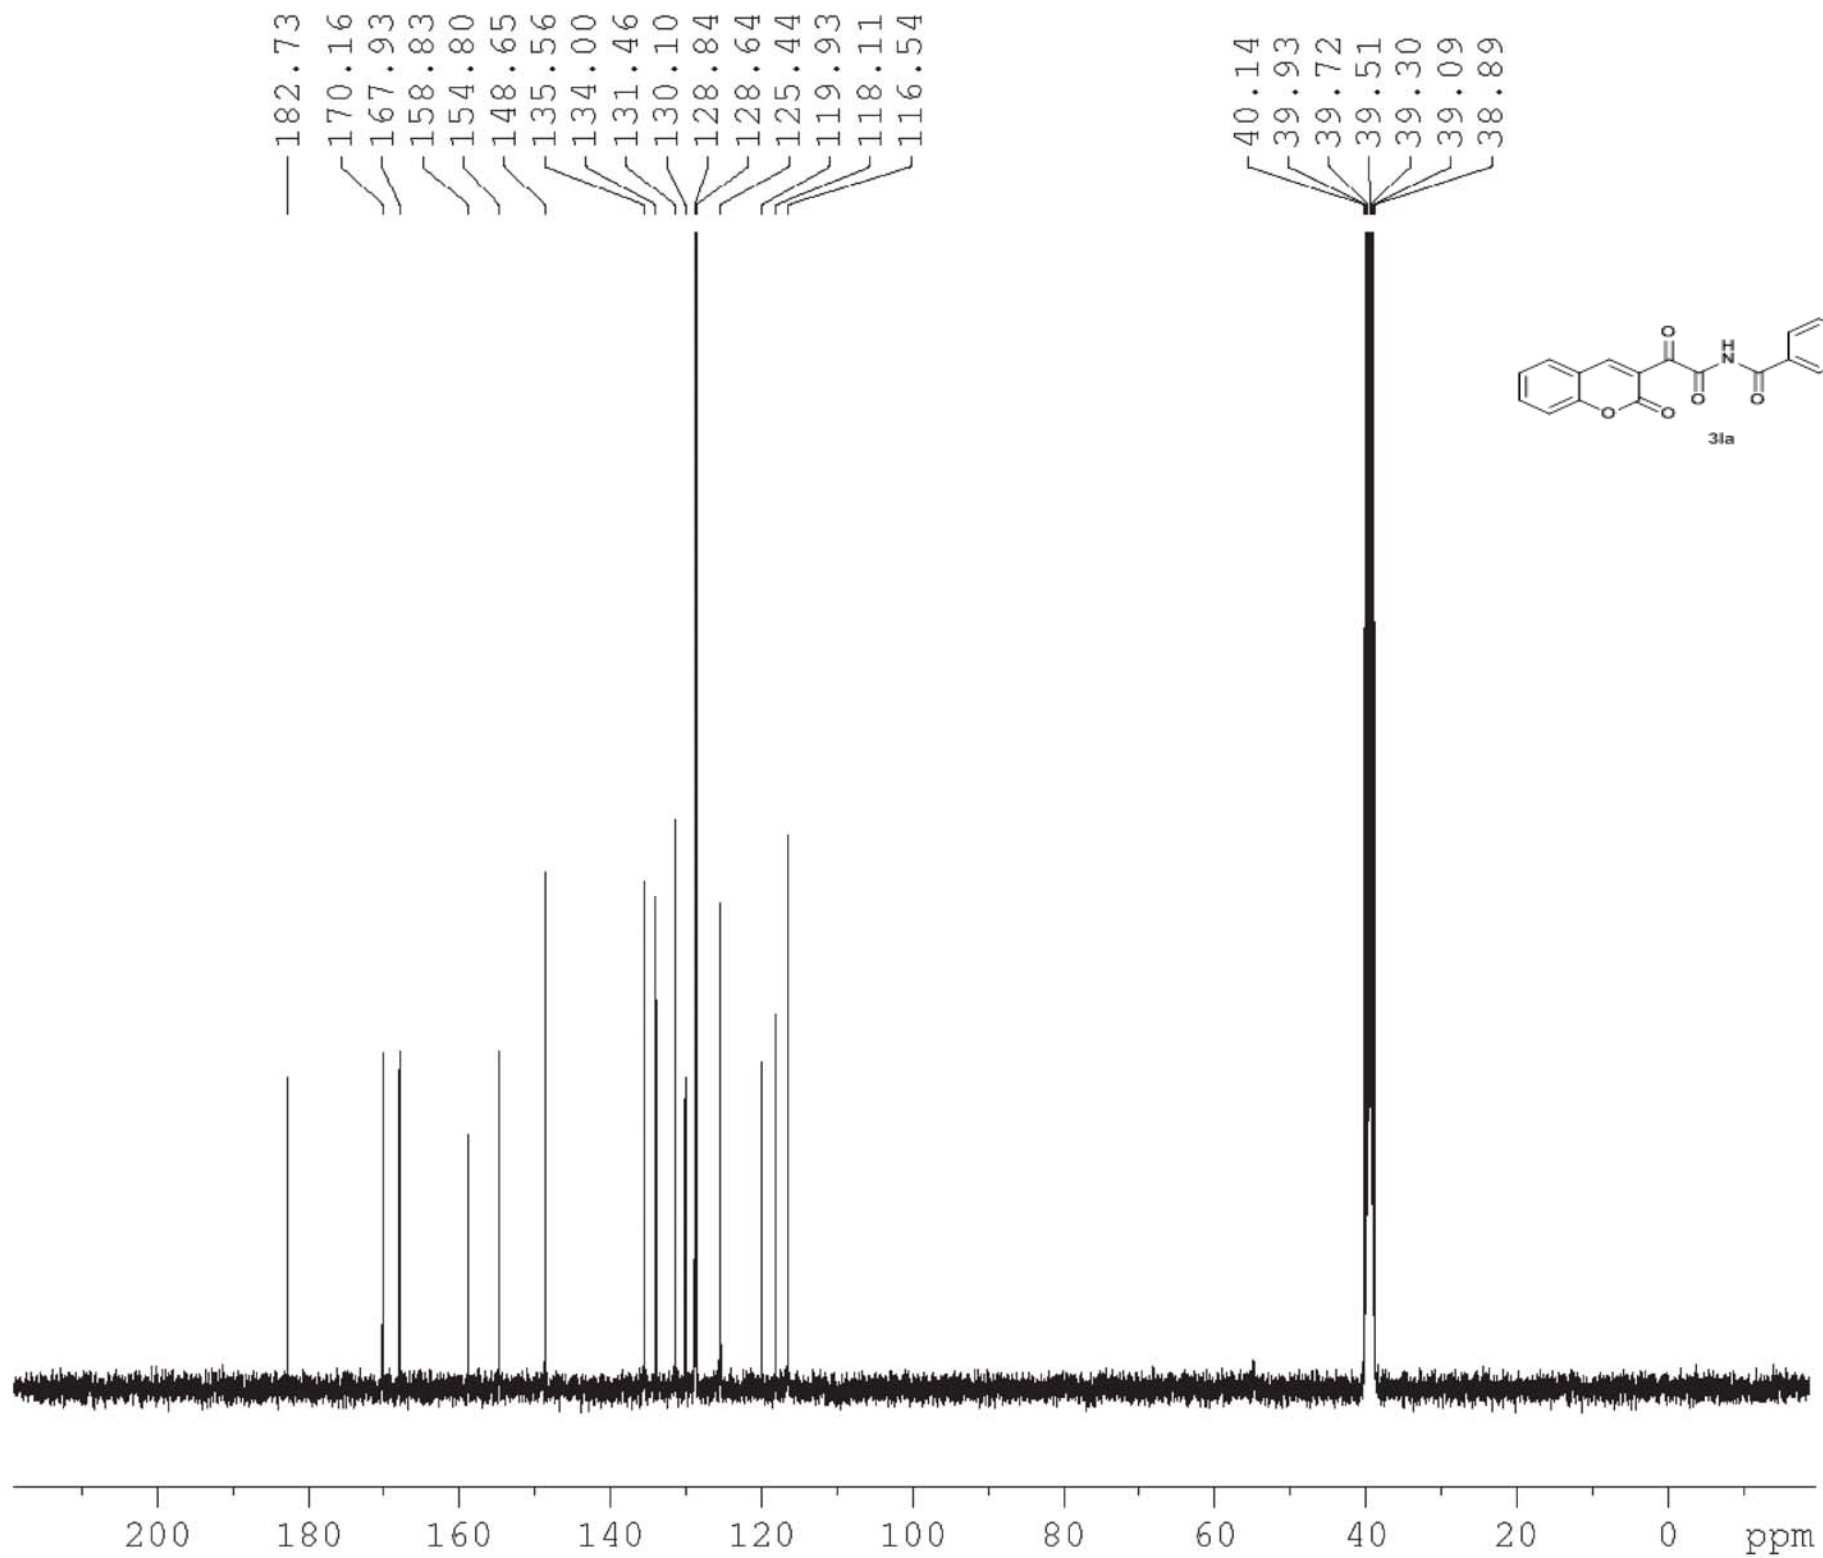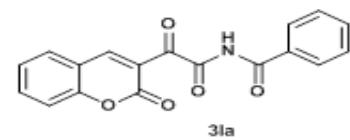

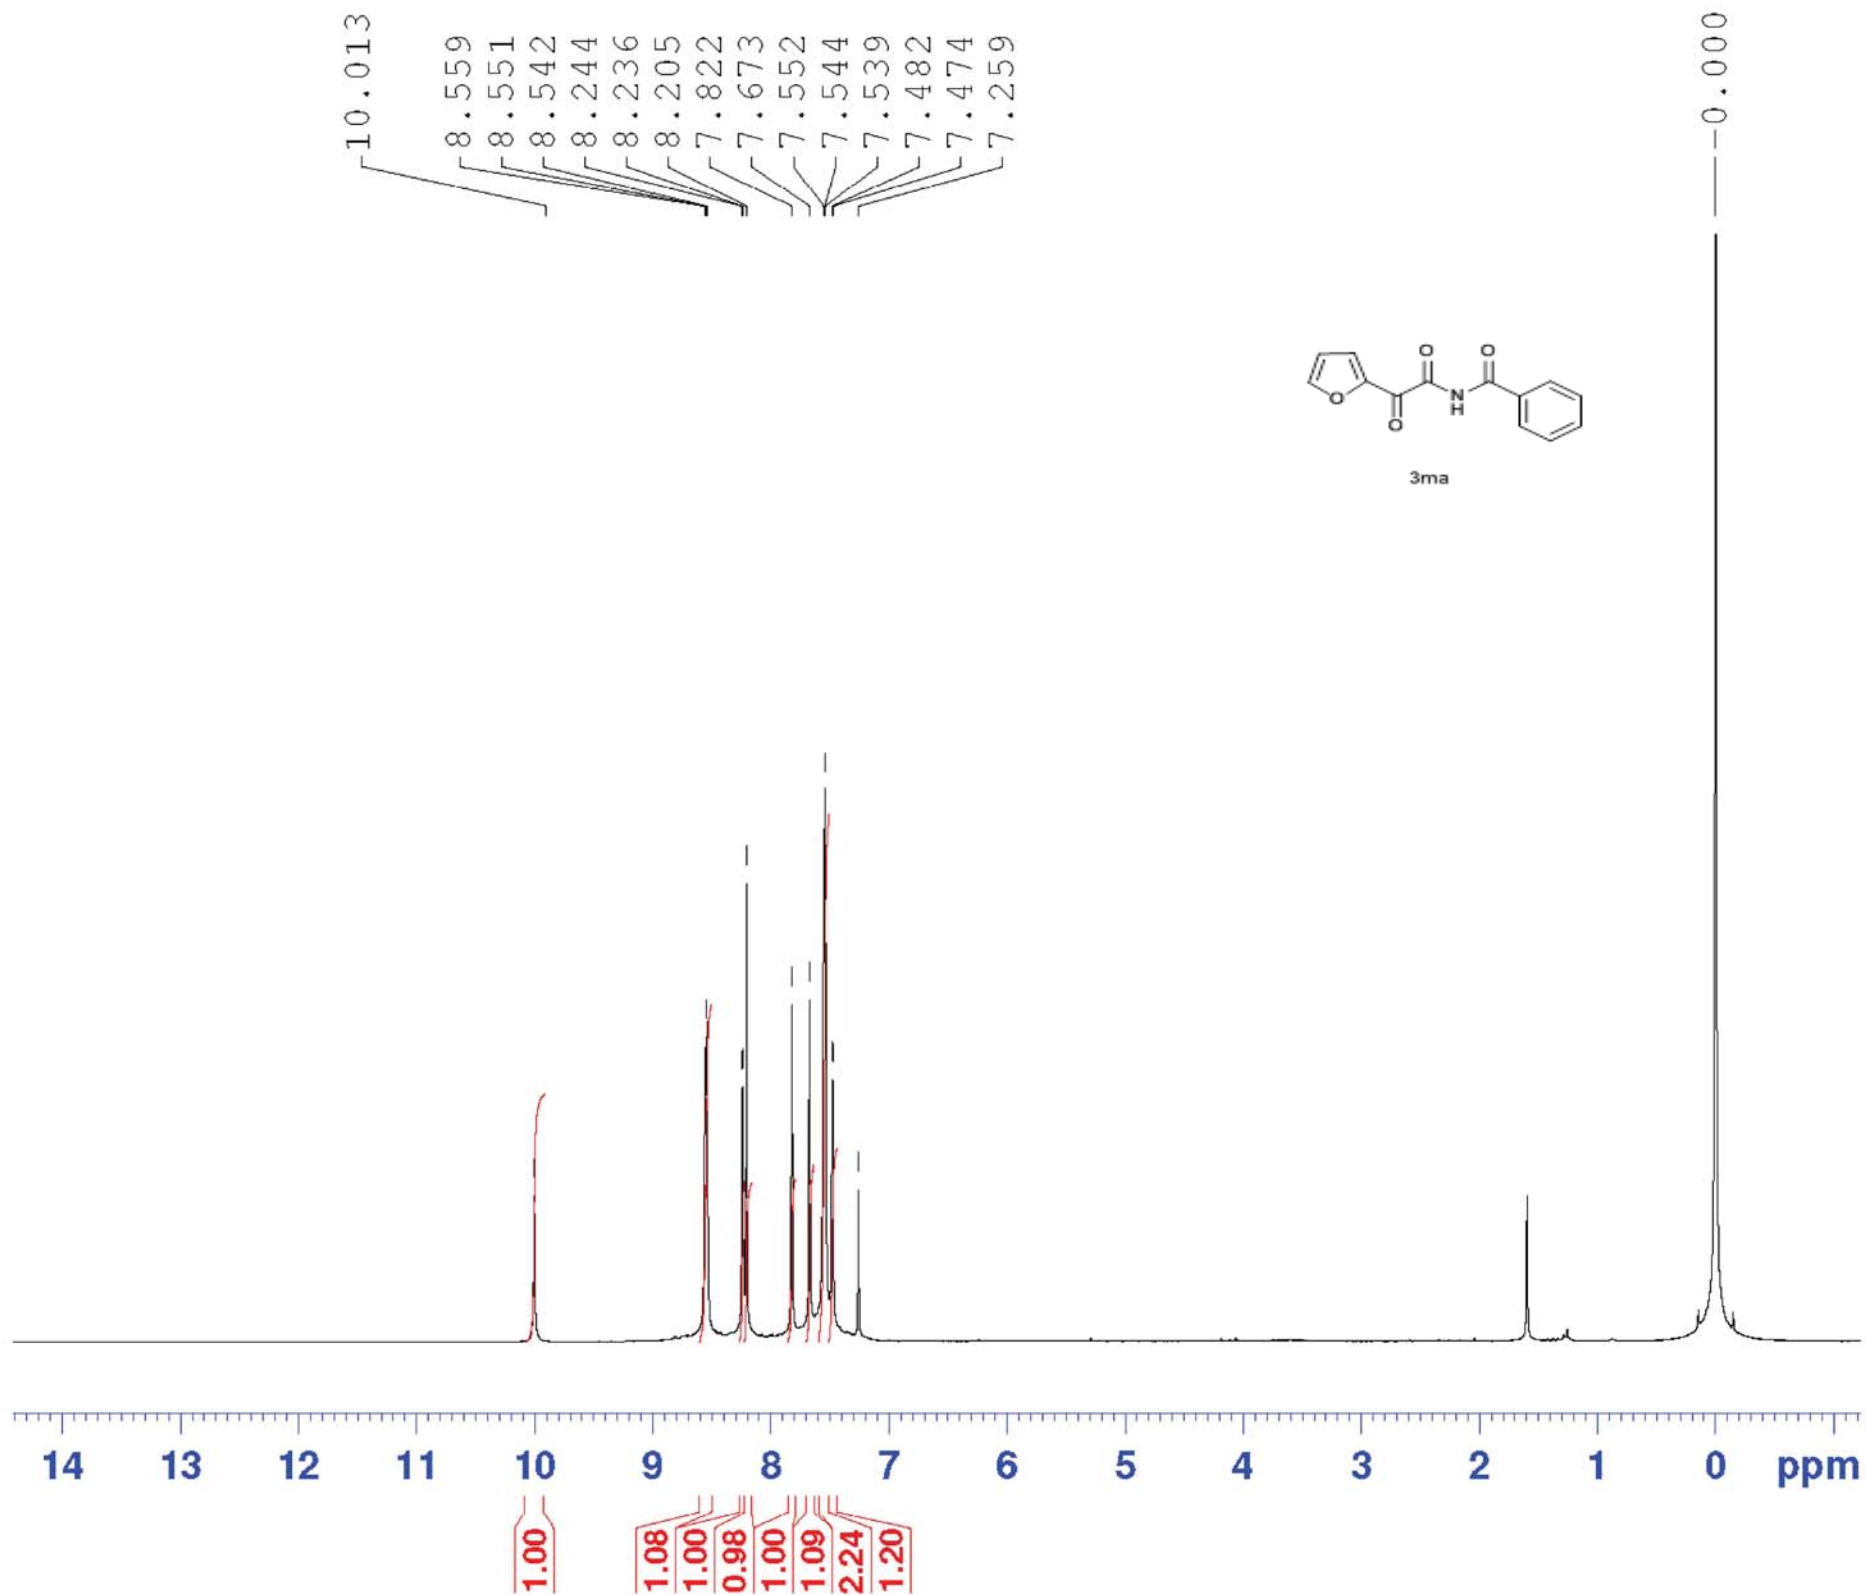

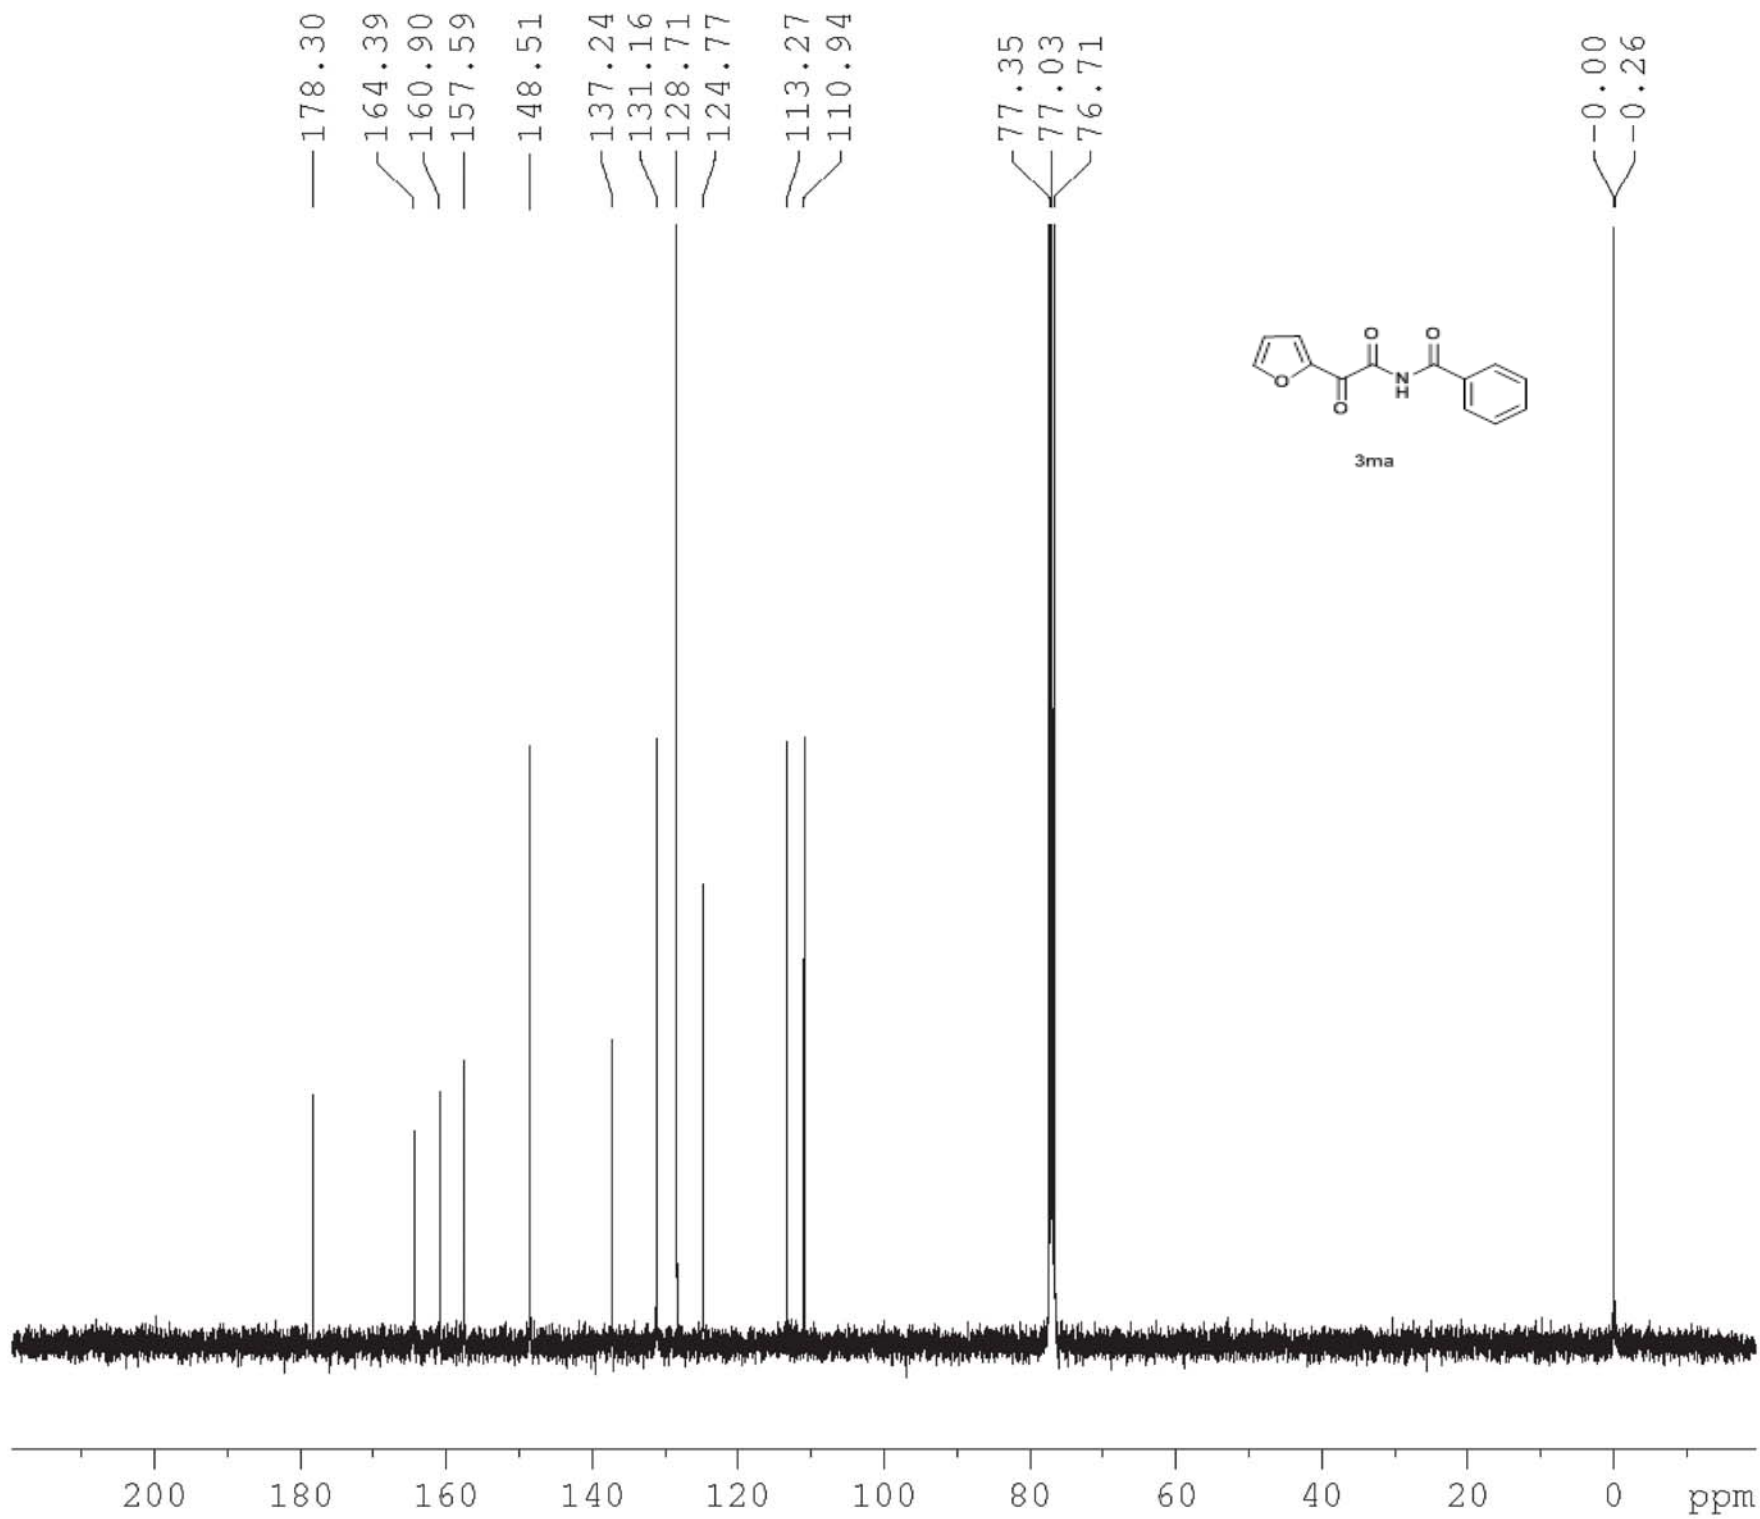

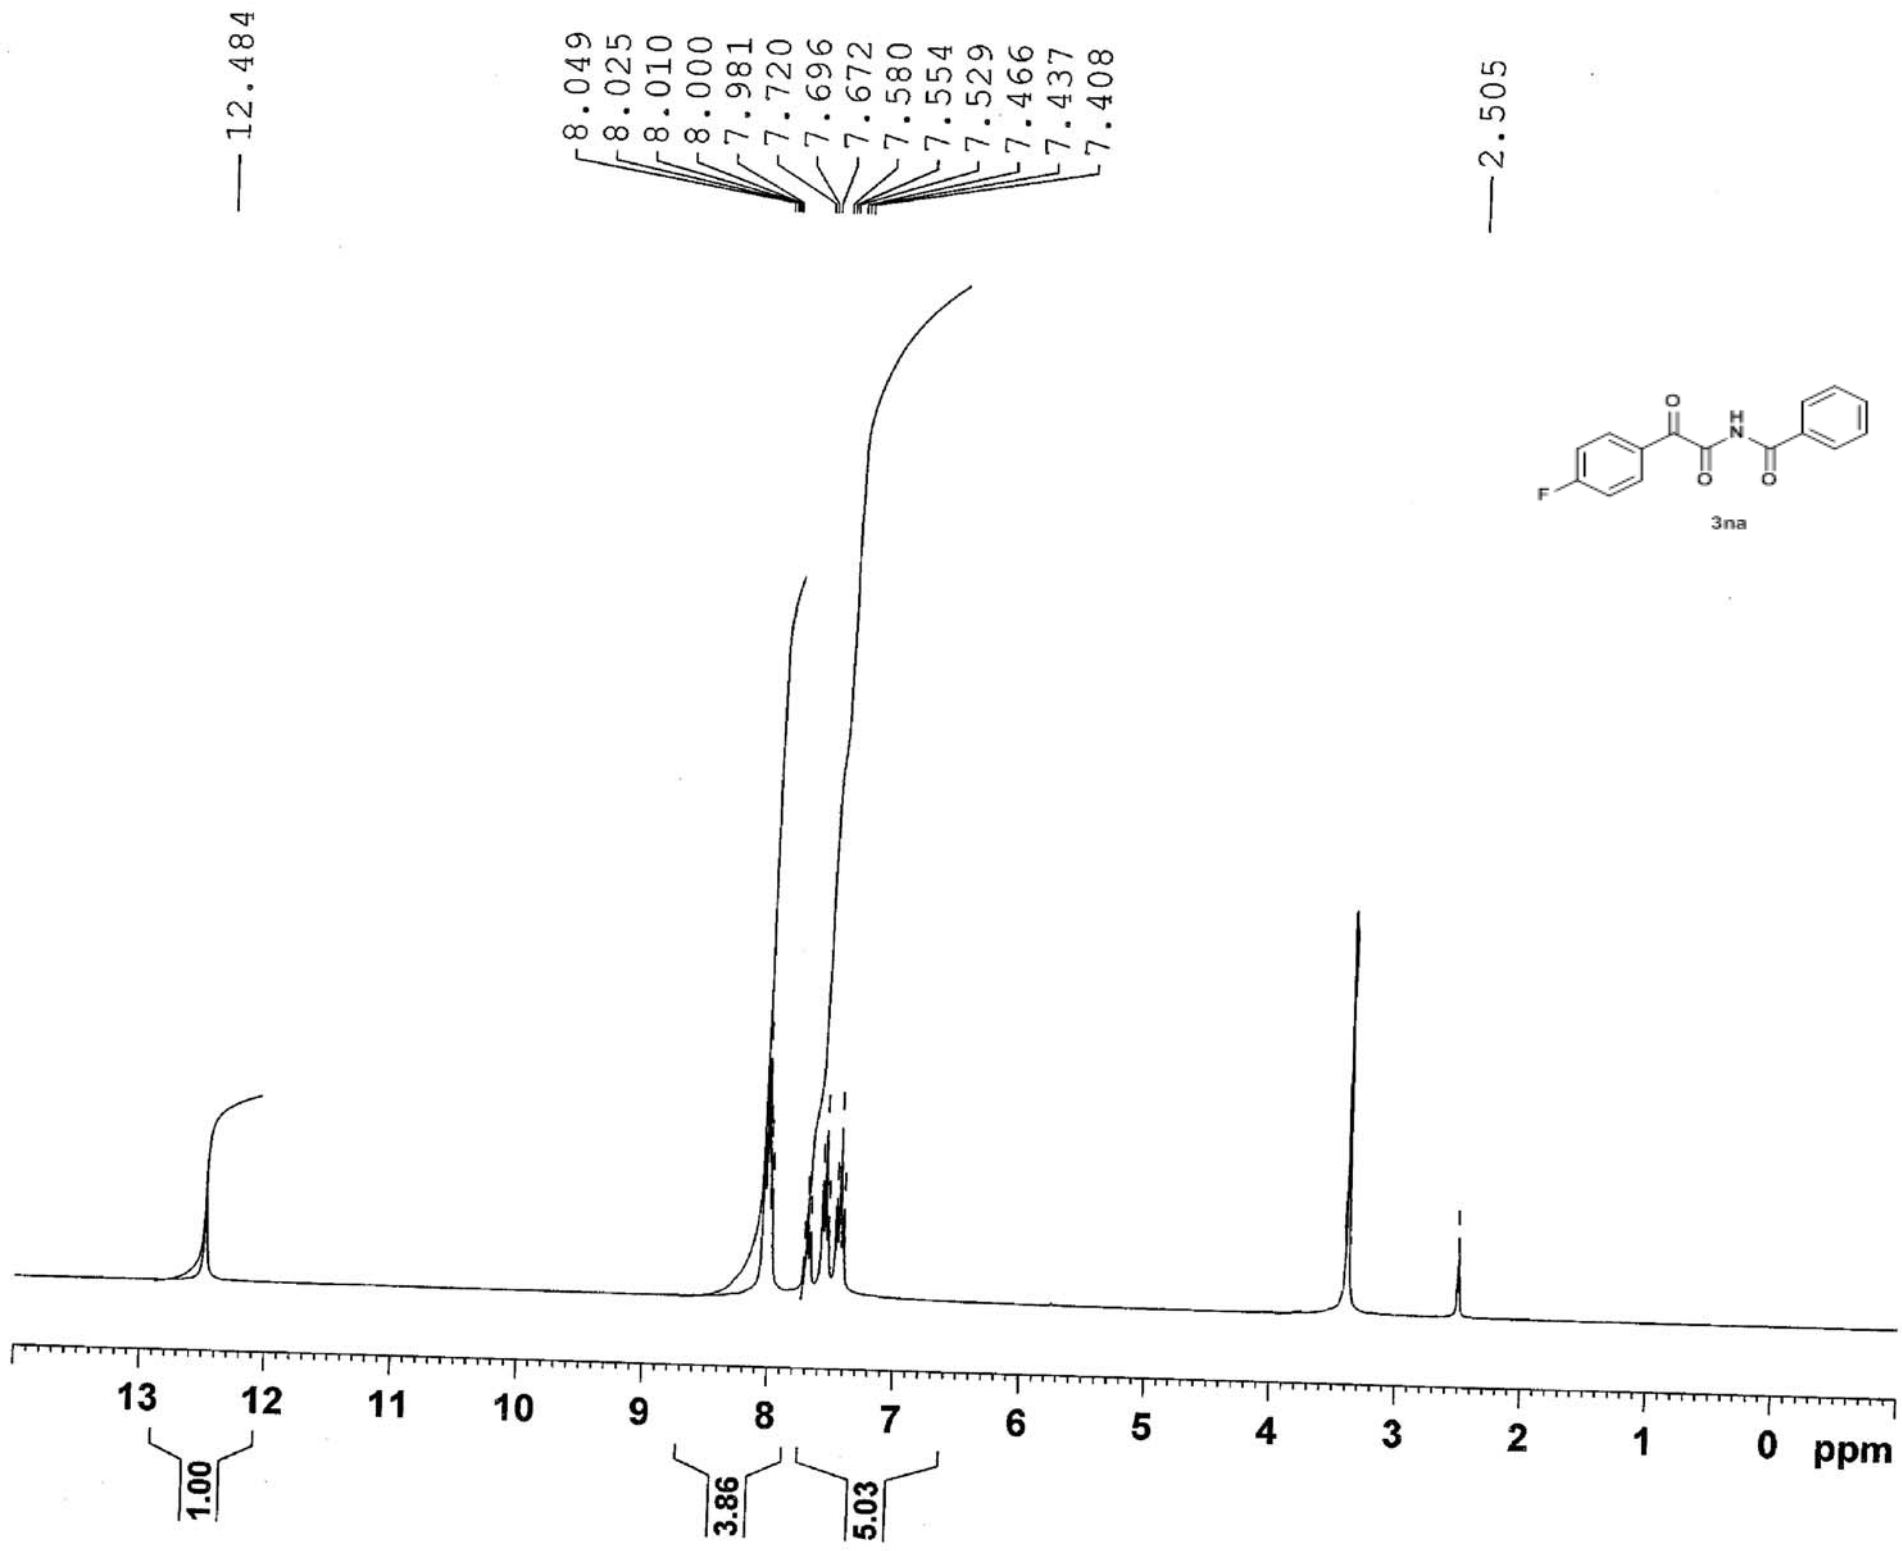

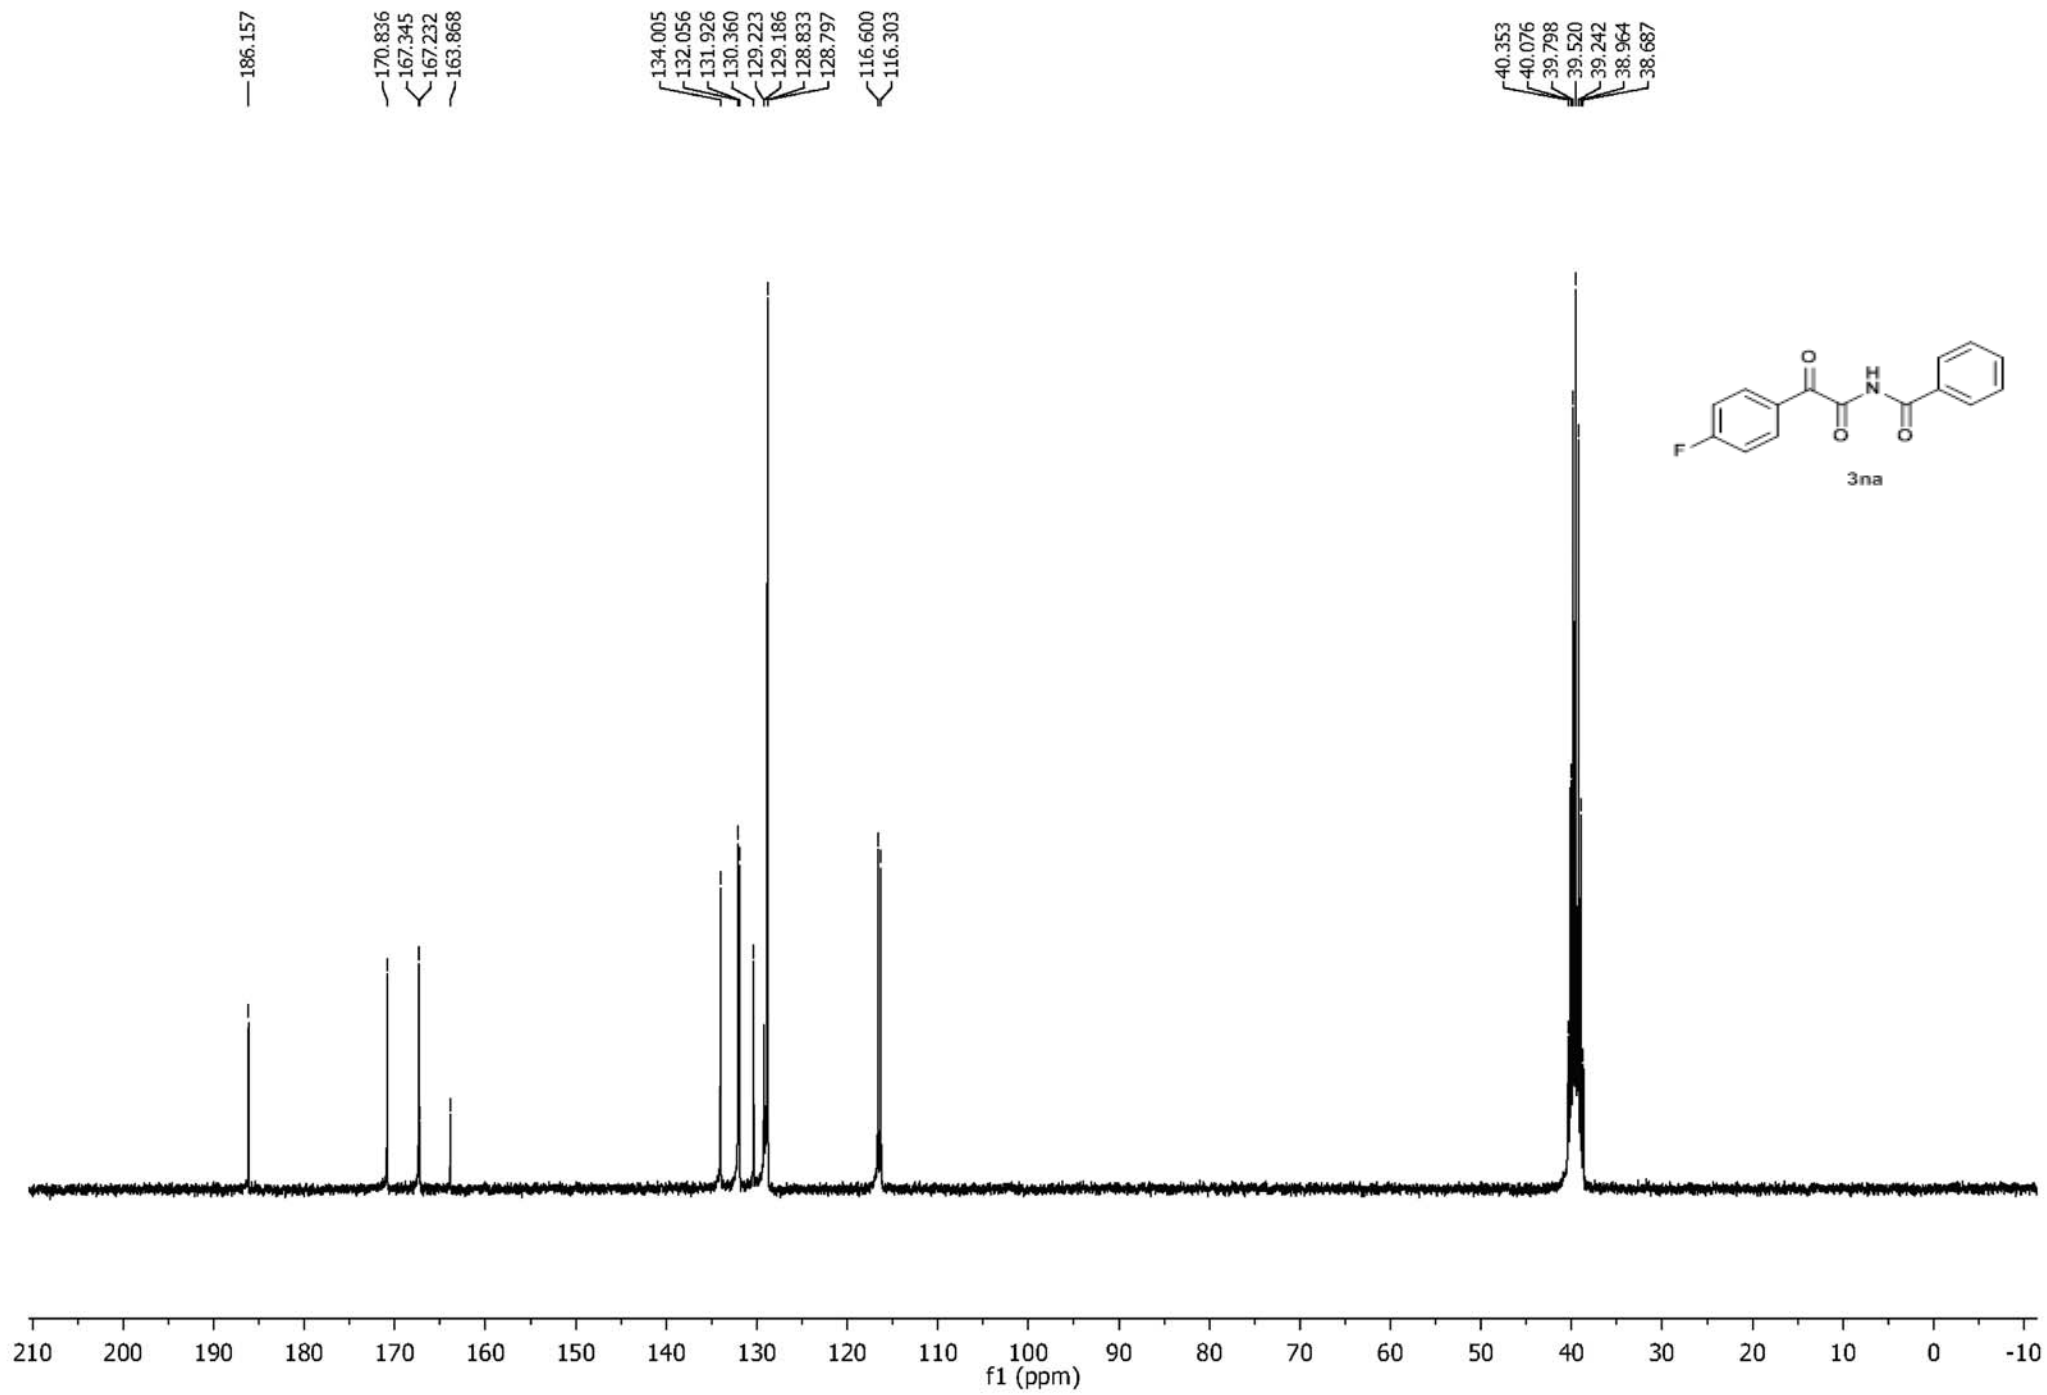

—9.592

8.110  
8.031  
8.015  
7.901  
7.886  
7.677  
7.660  
7.643  
7.626  
7.550  
7.536  
7.523  
7.498  
7.483  
7.468  
7.260

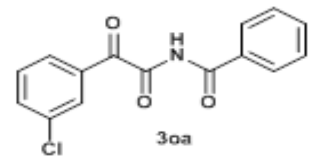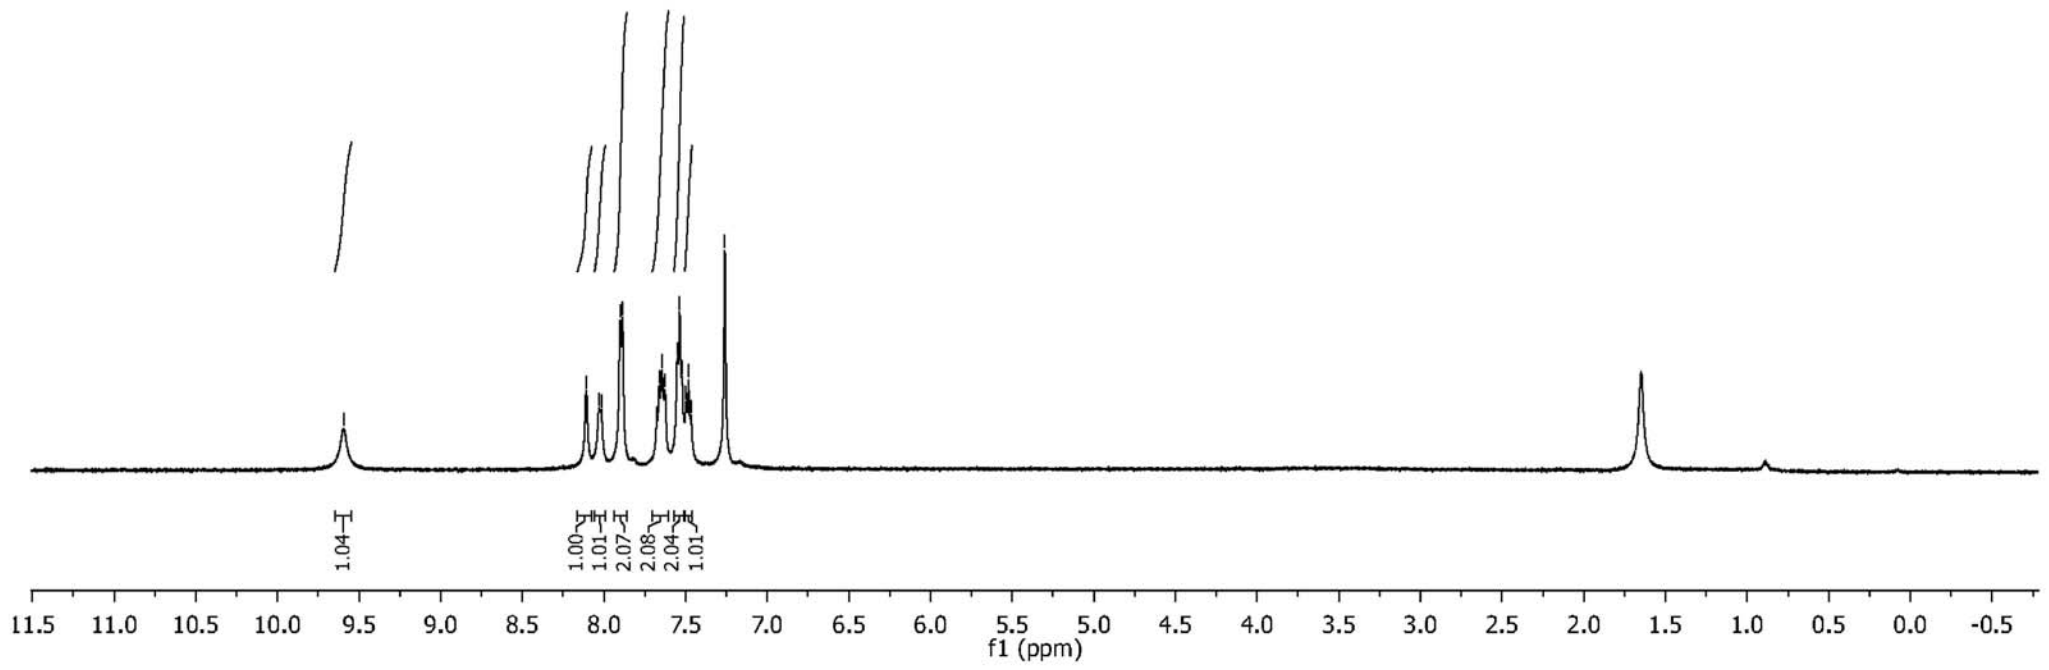

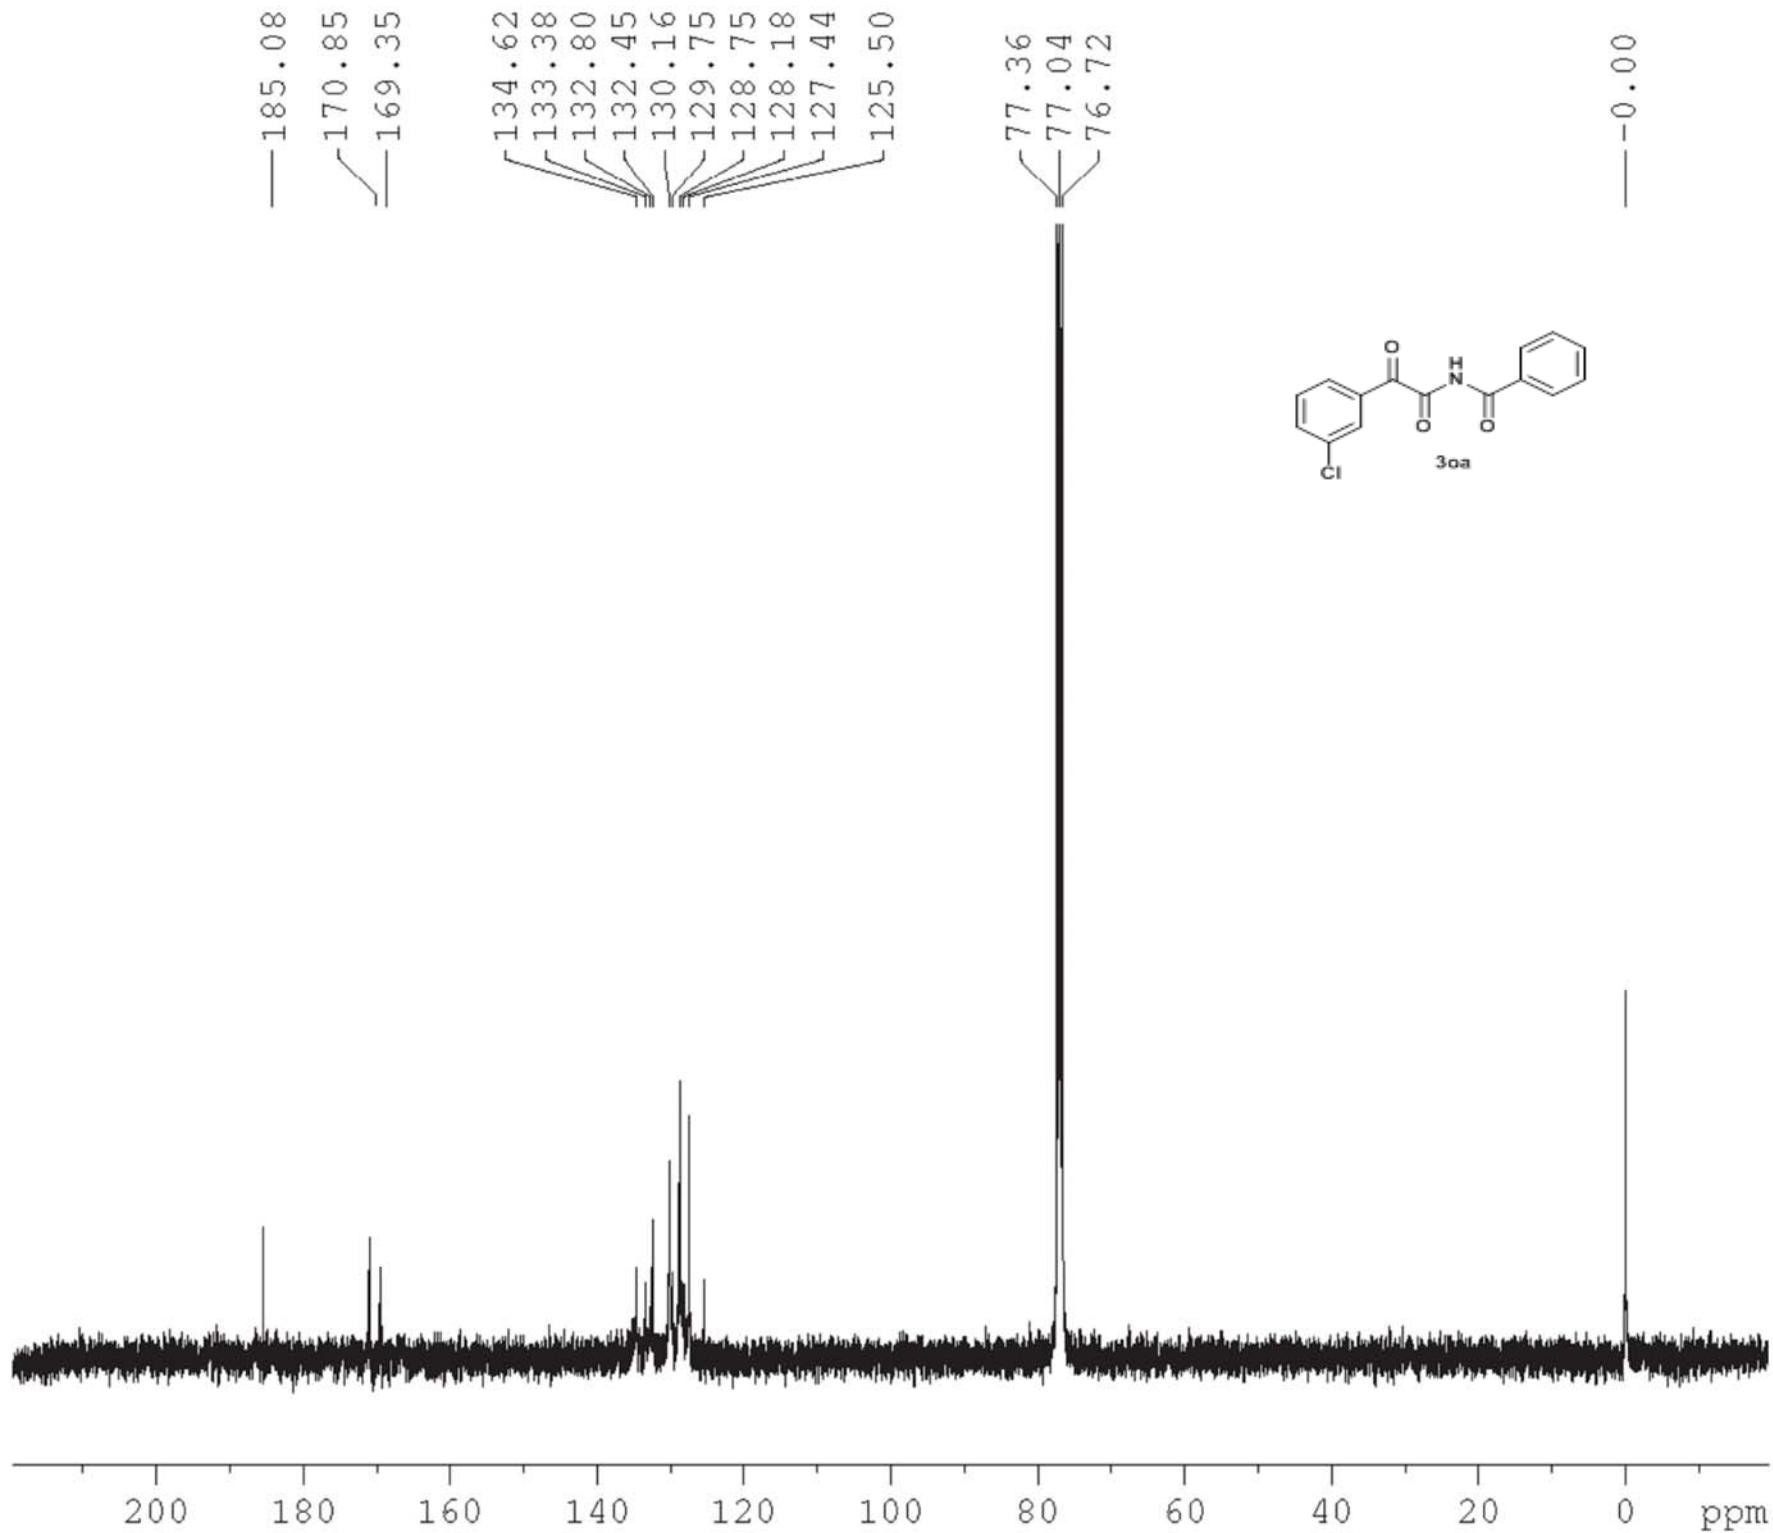

—12.548

8.101  
8.071  
8.043  
7.958  
7.934  
7.861  
7.746  
7.714  
7.685  
7.662  
7.625  
7.602  
7.579  
7.553

—2.515

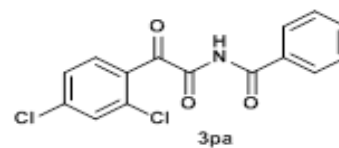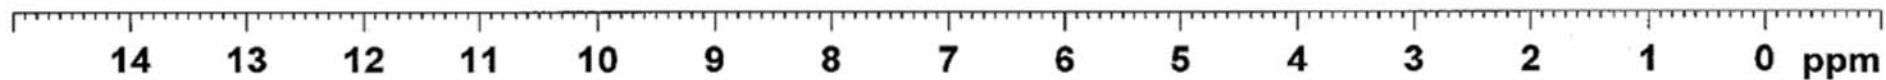

1.00

2.05  
0.87  
1.14  
2.03  
2.20



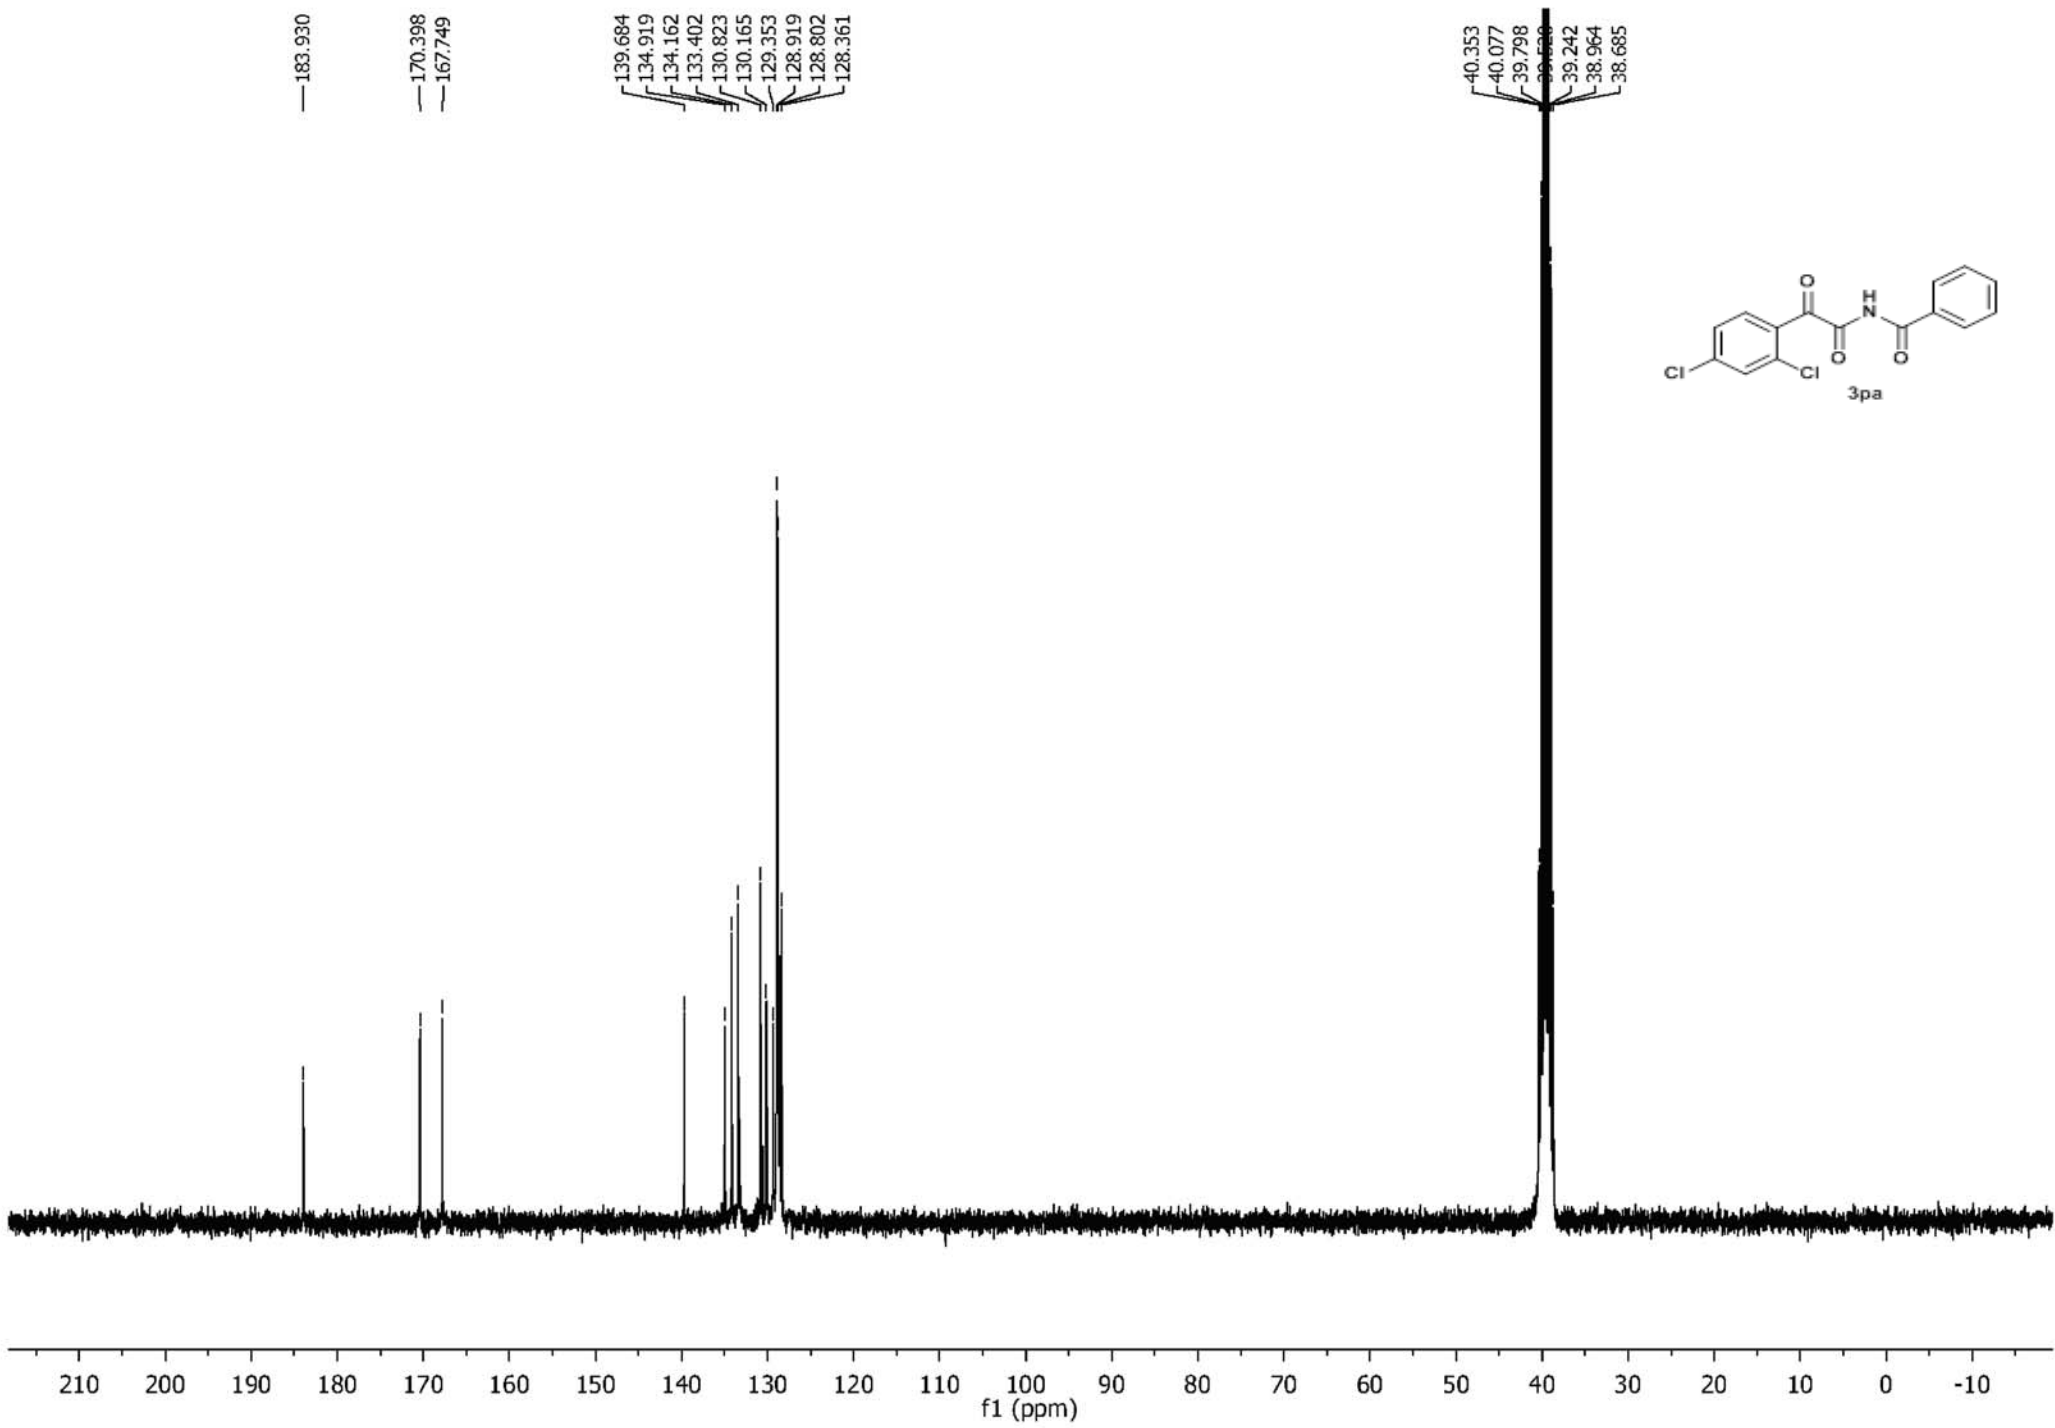

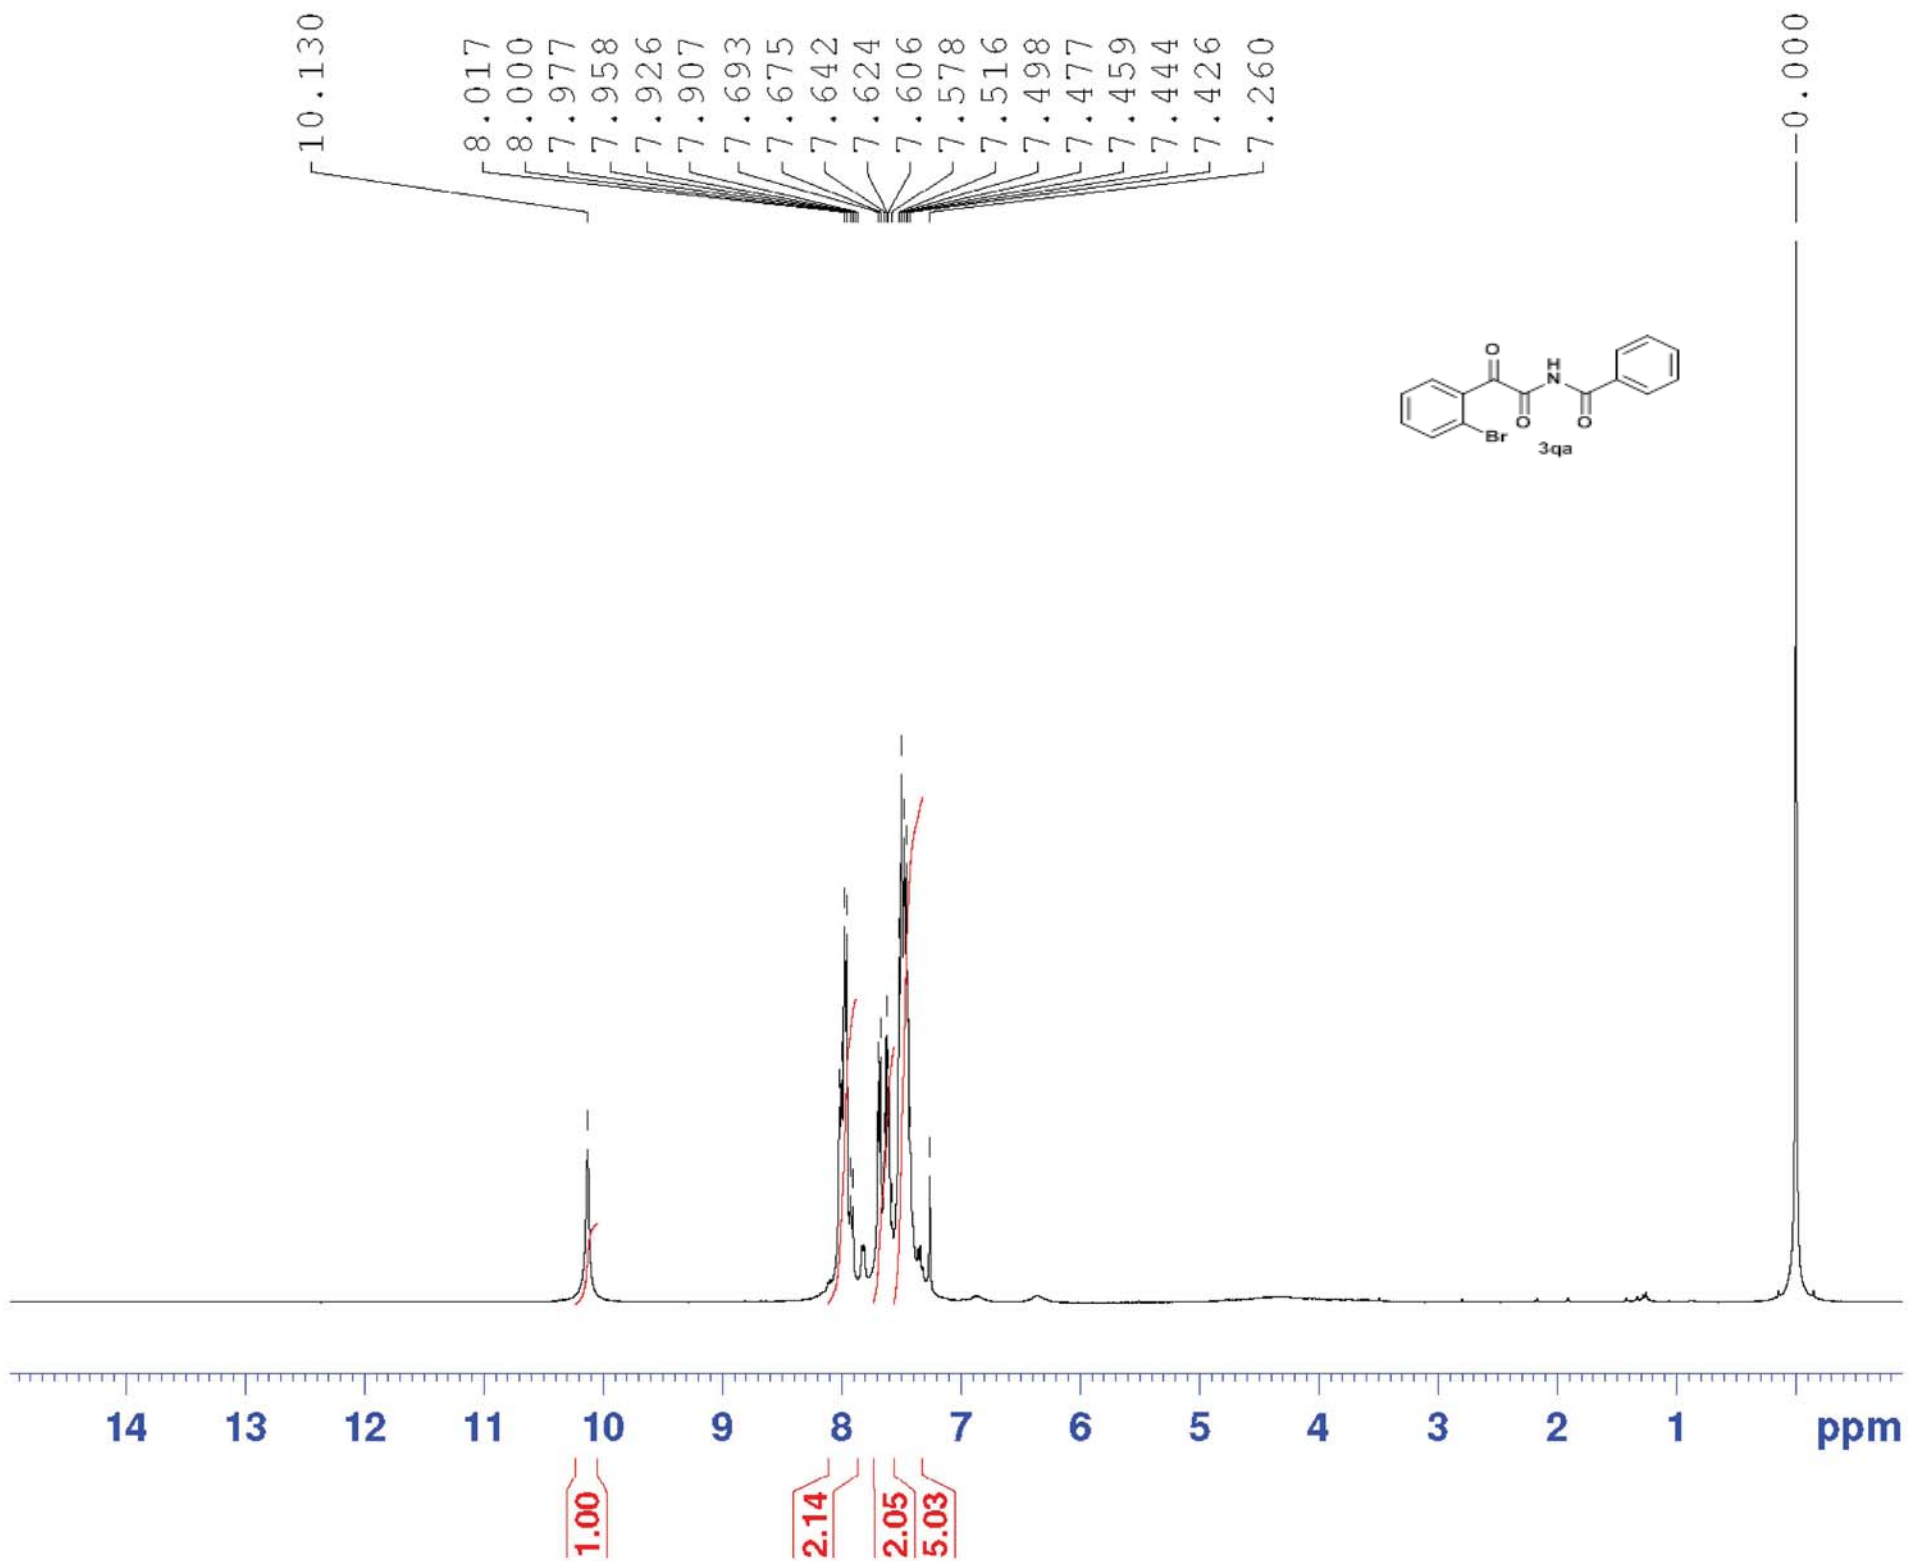

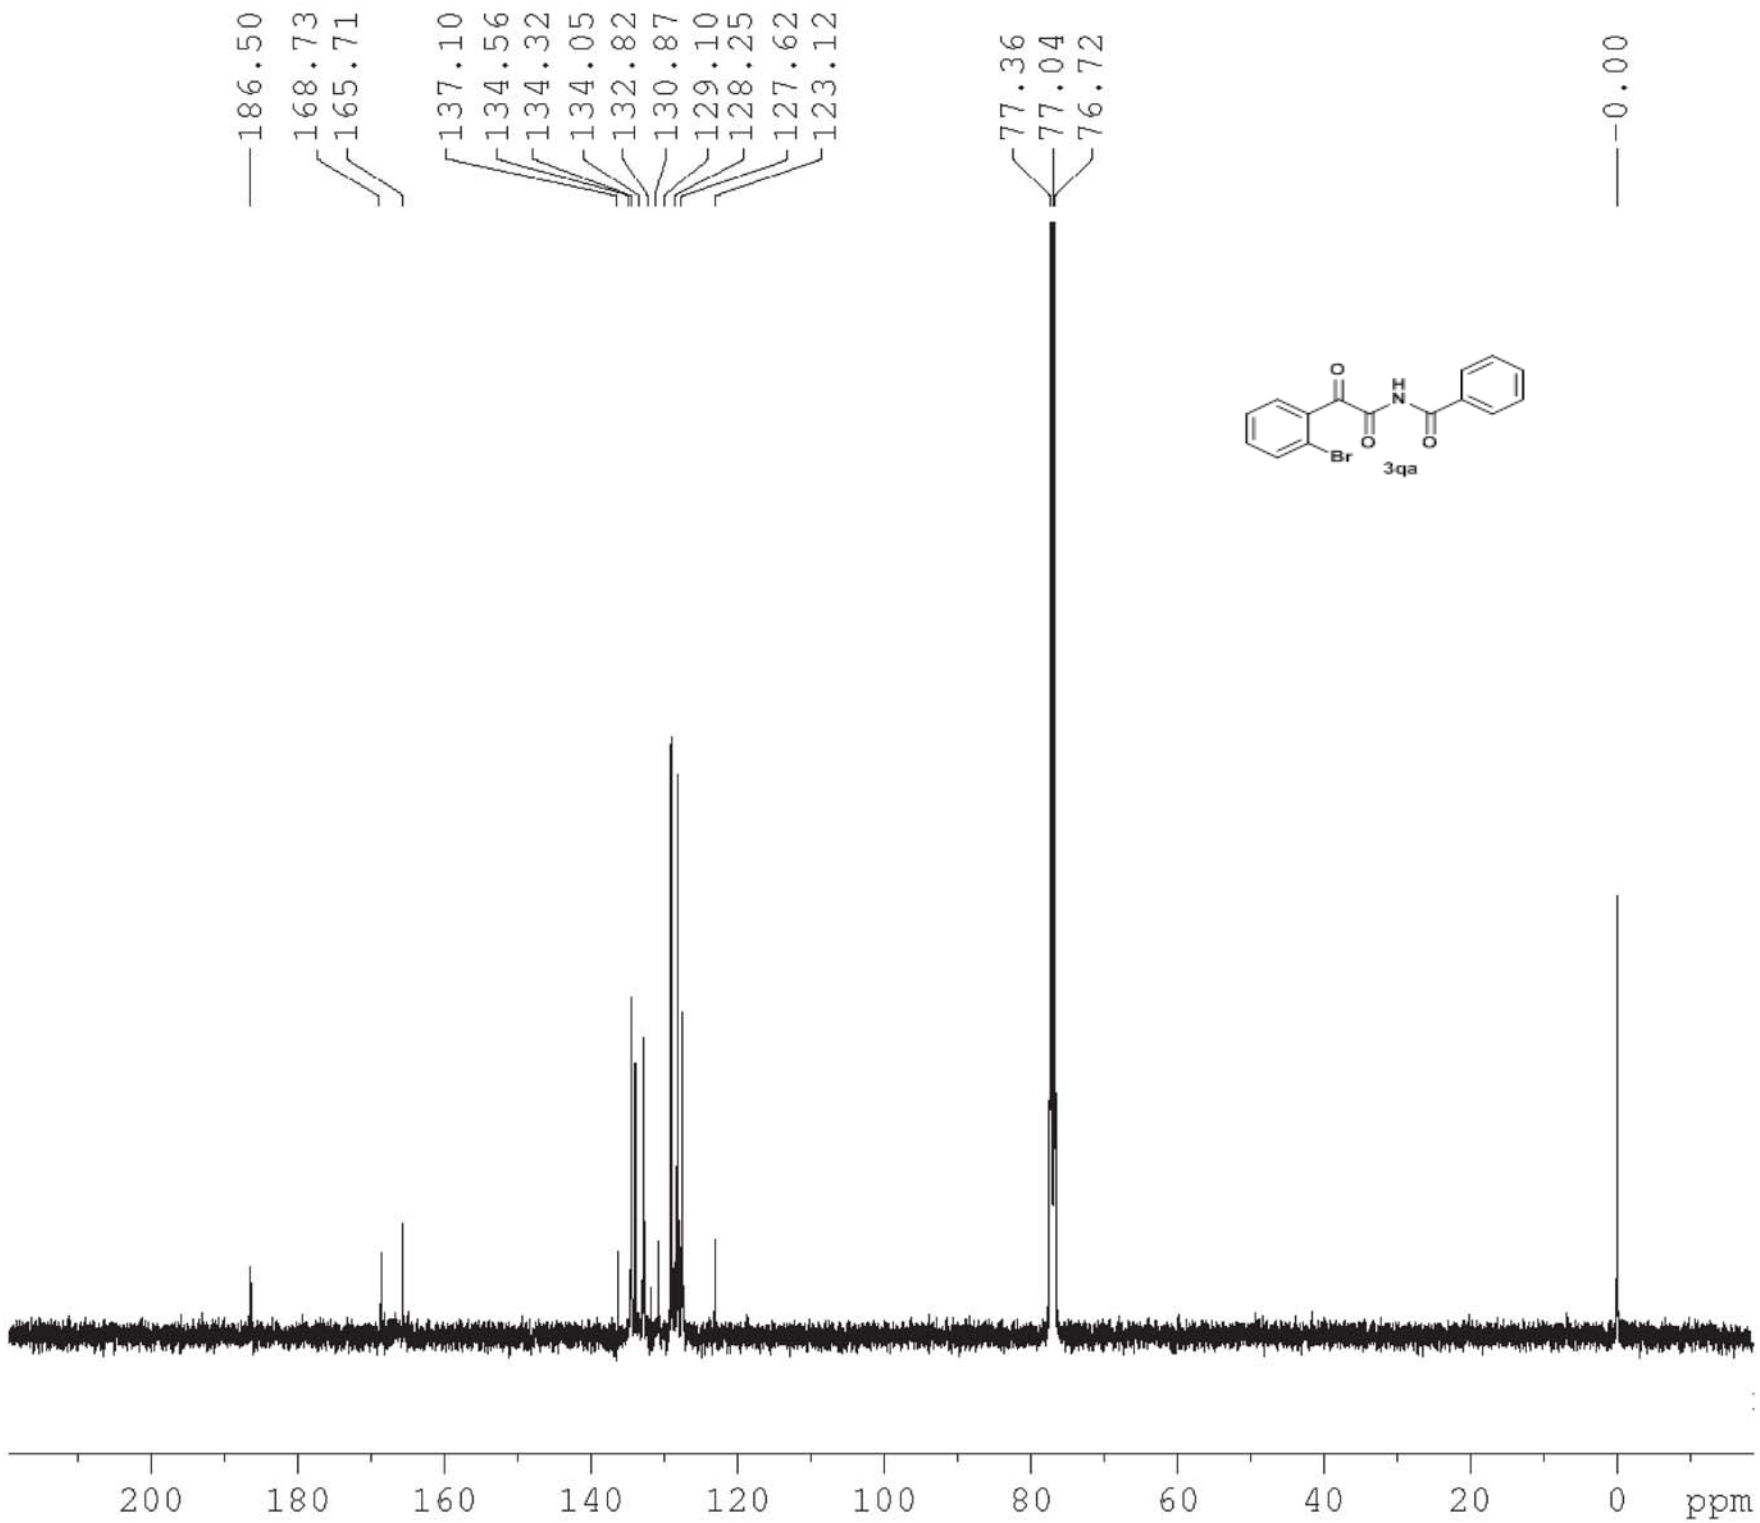

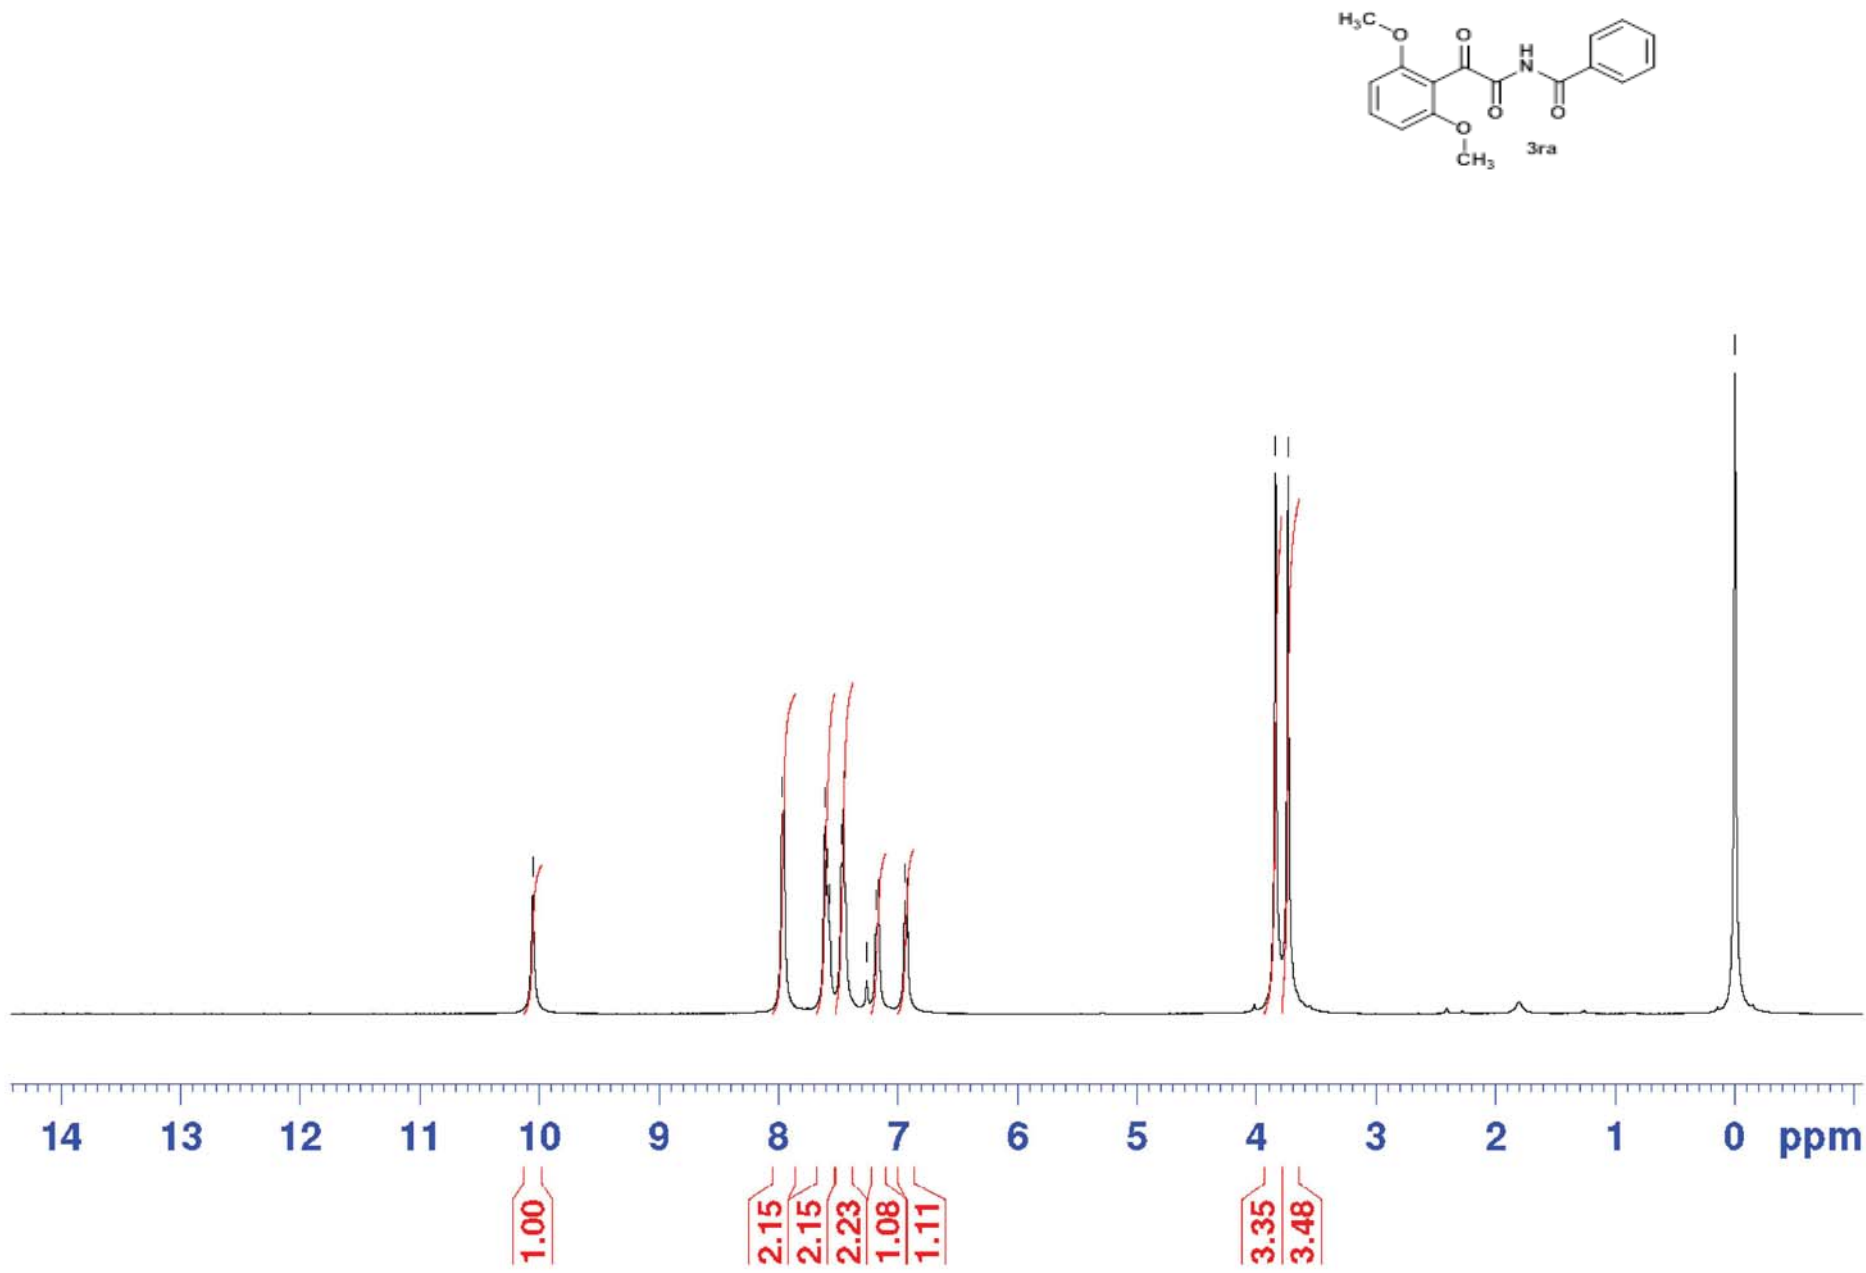

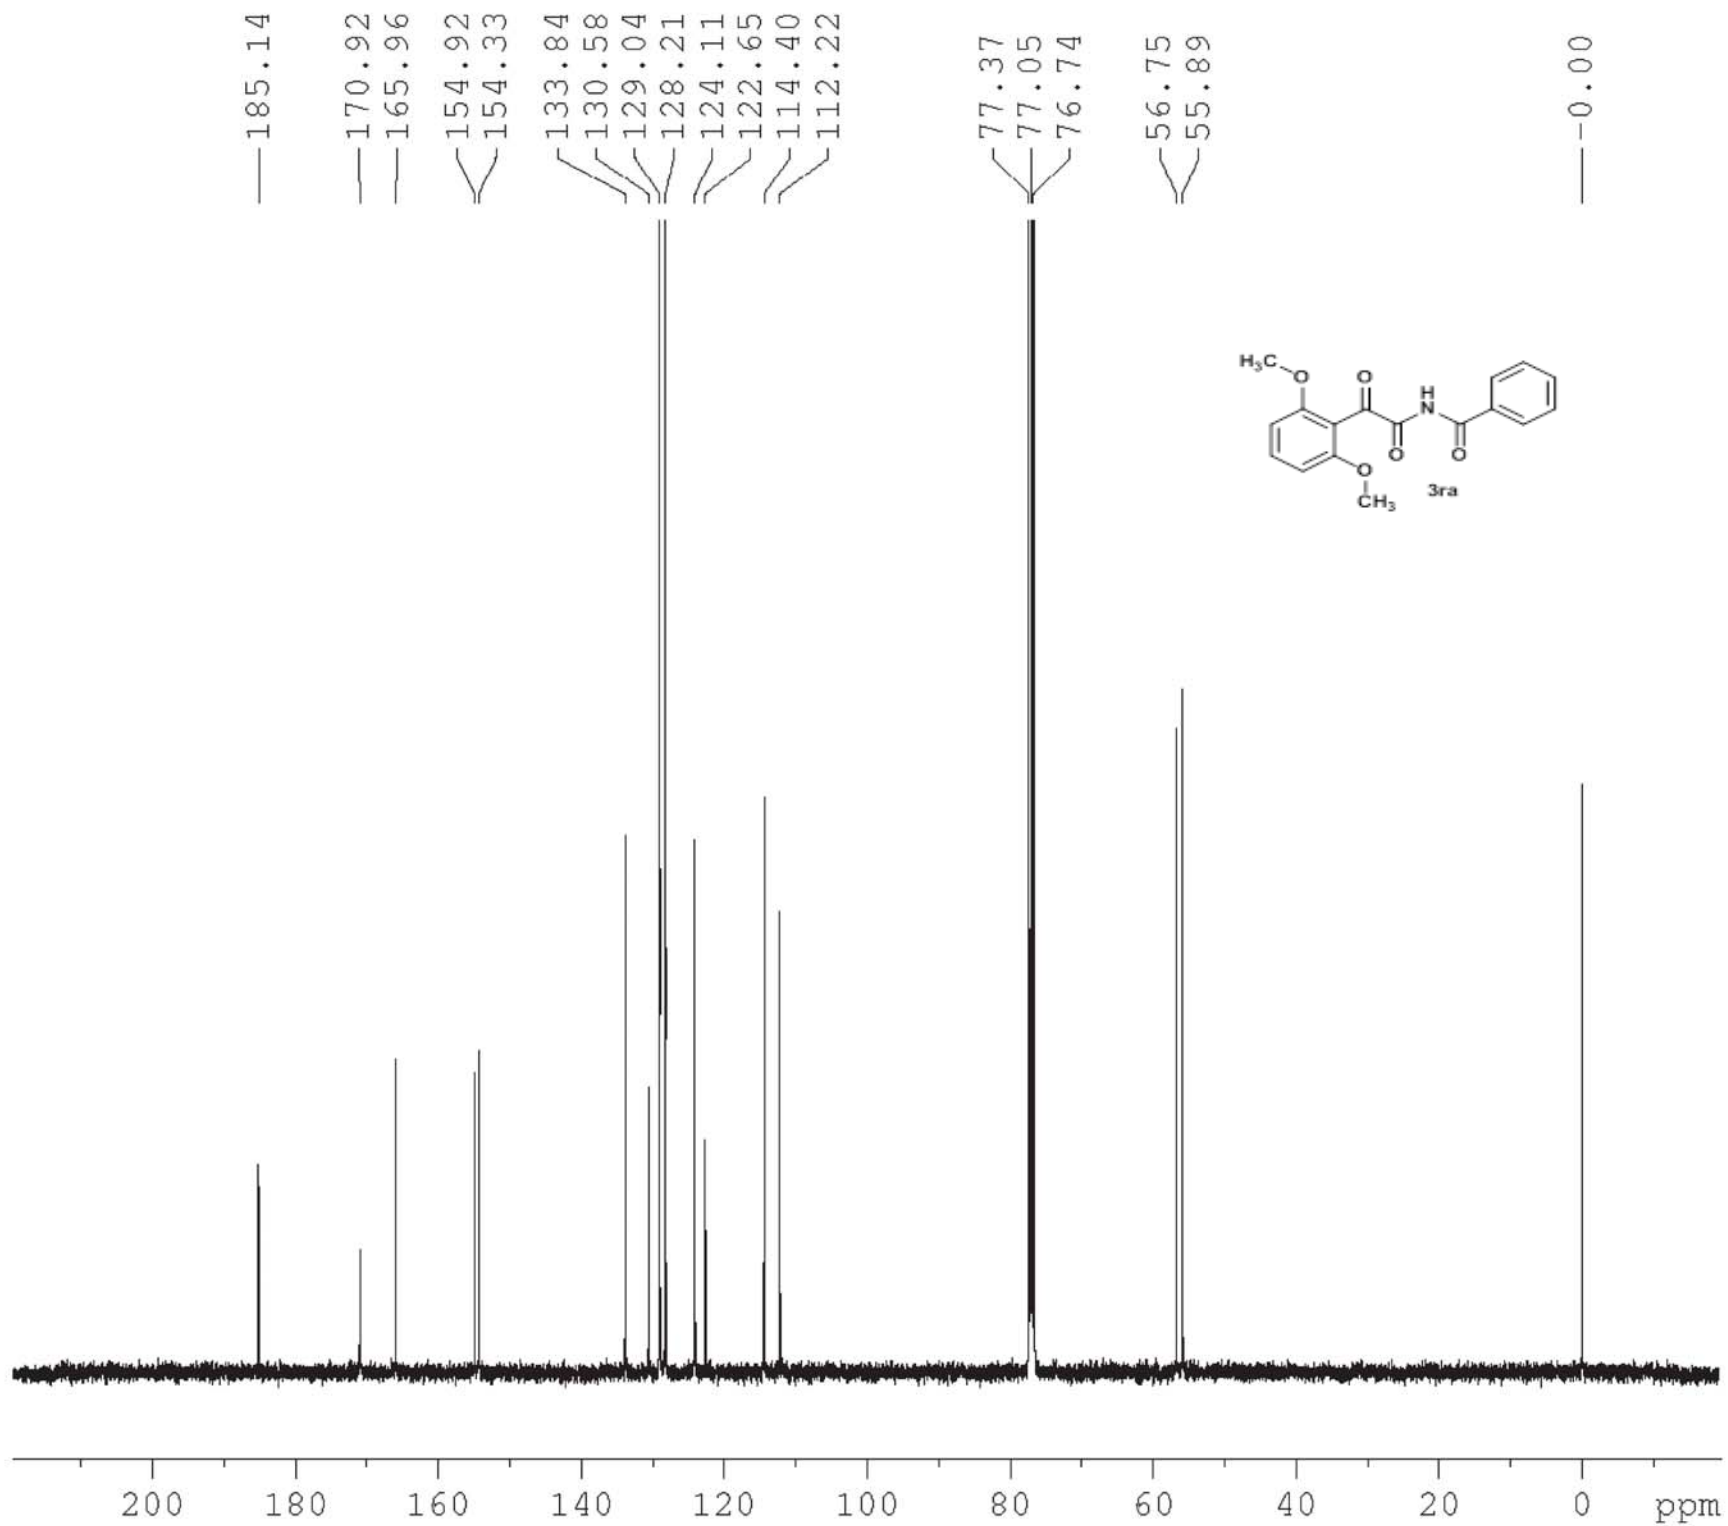

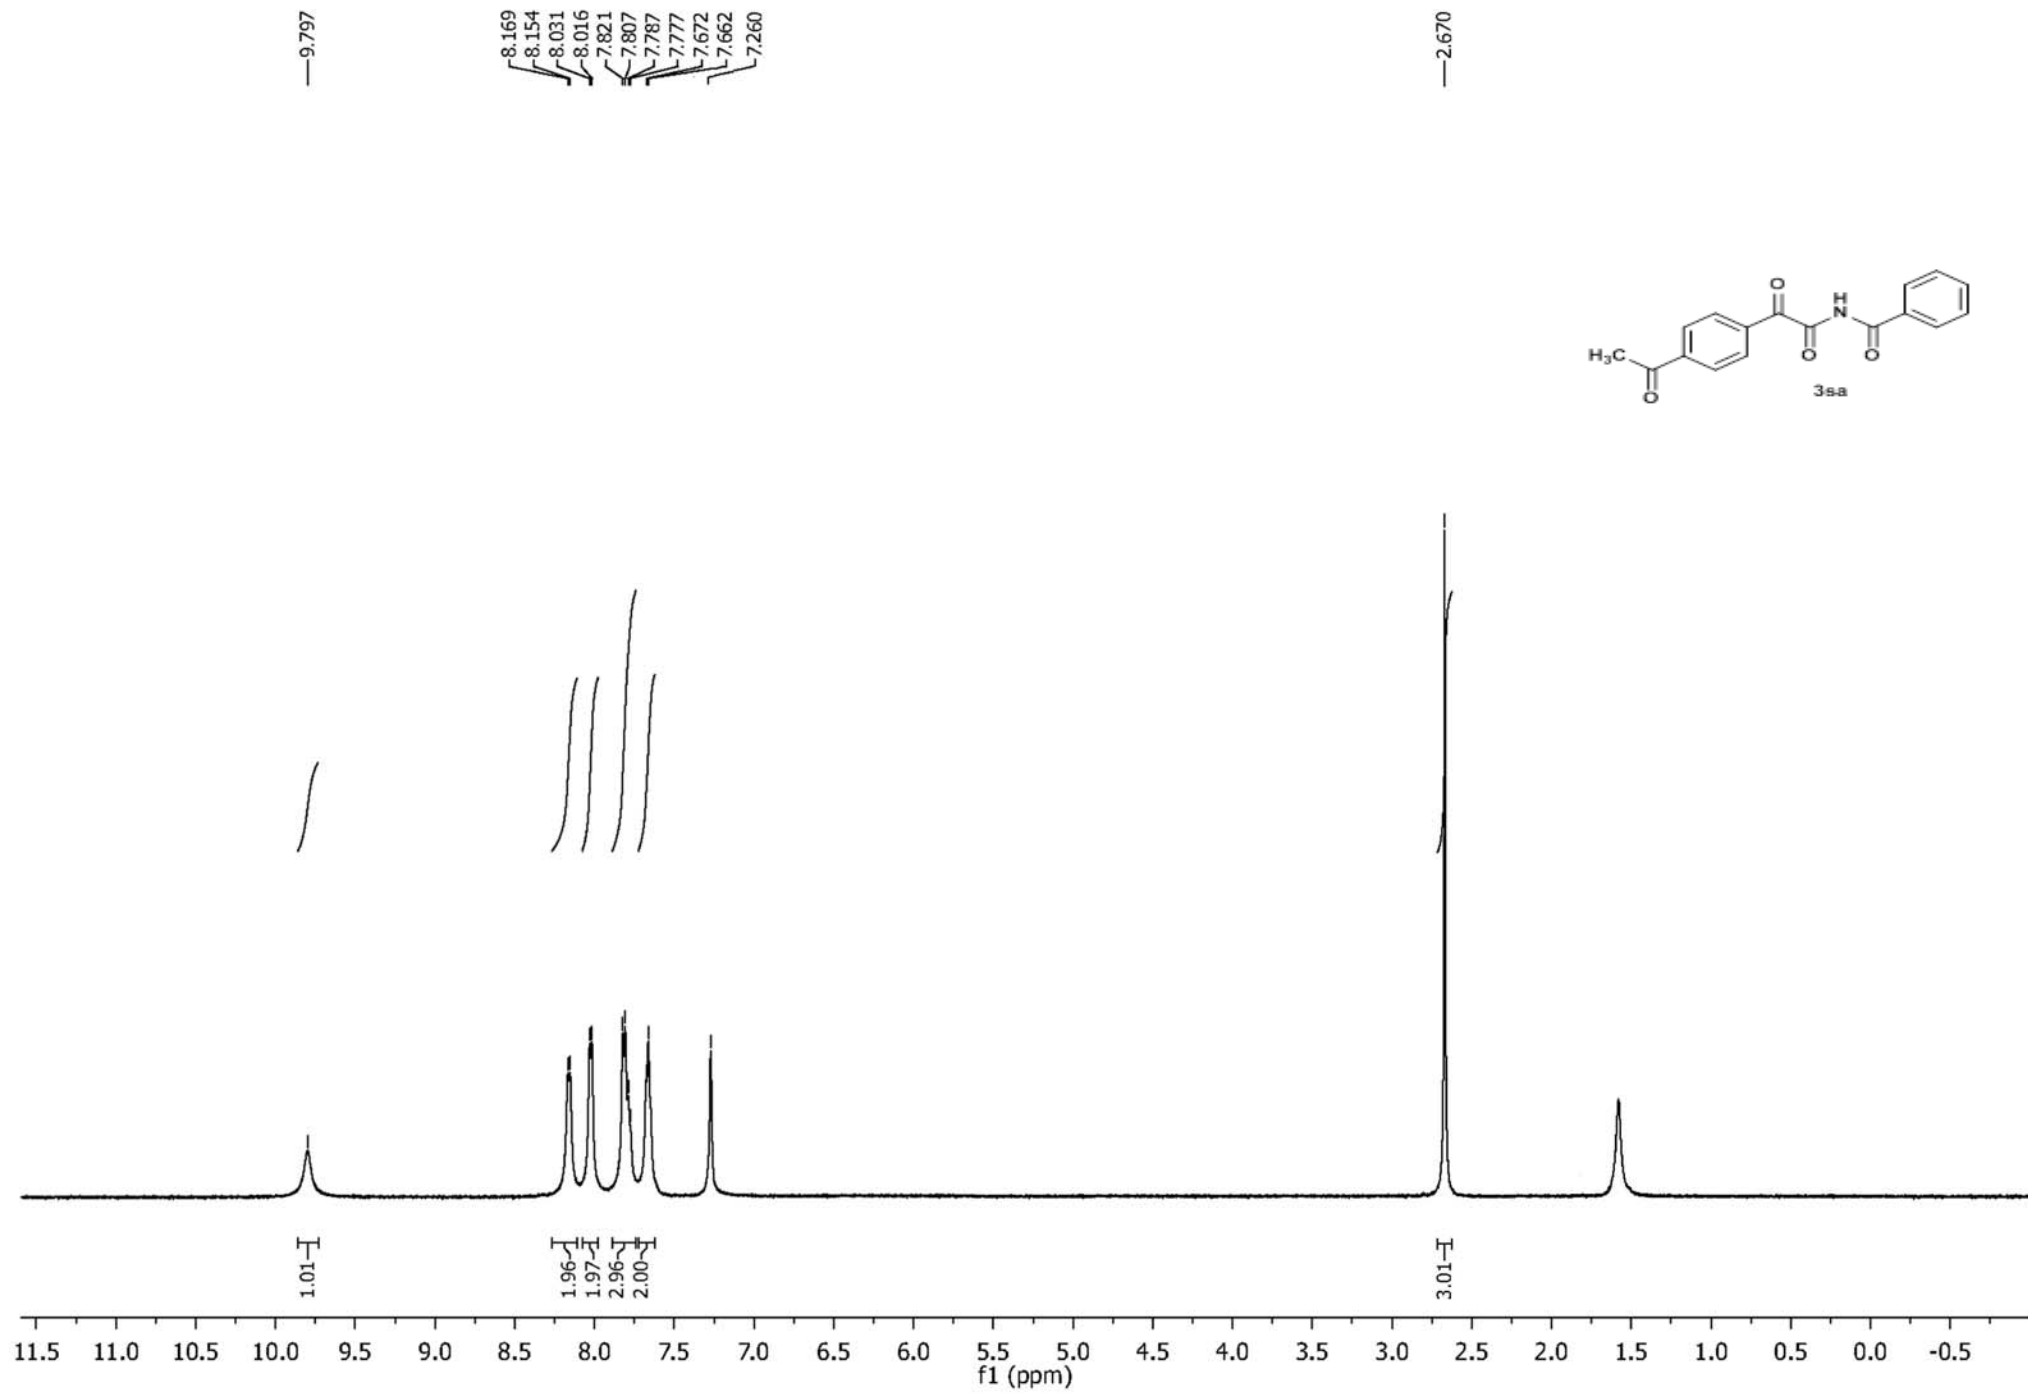

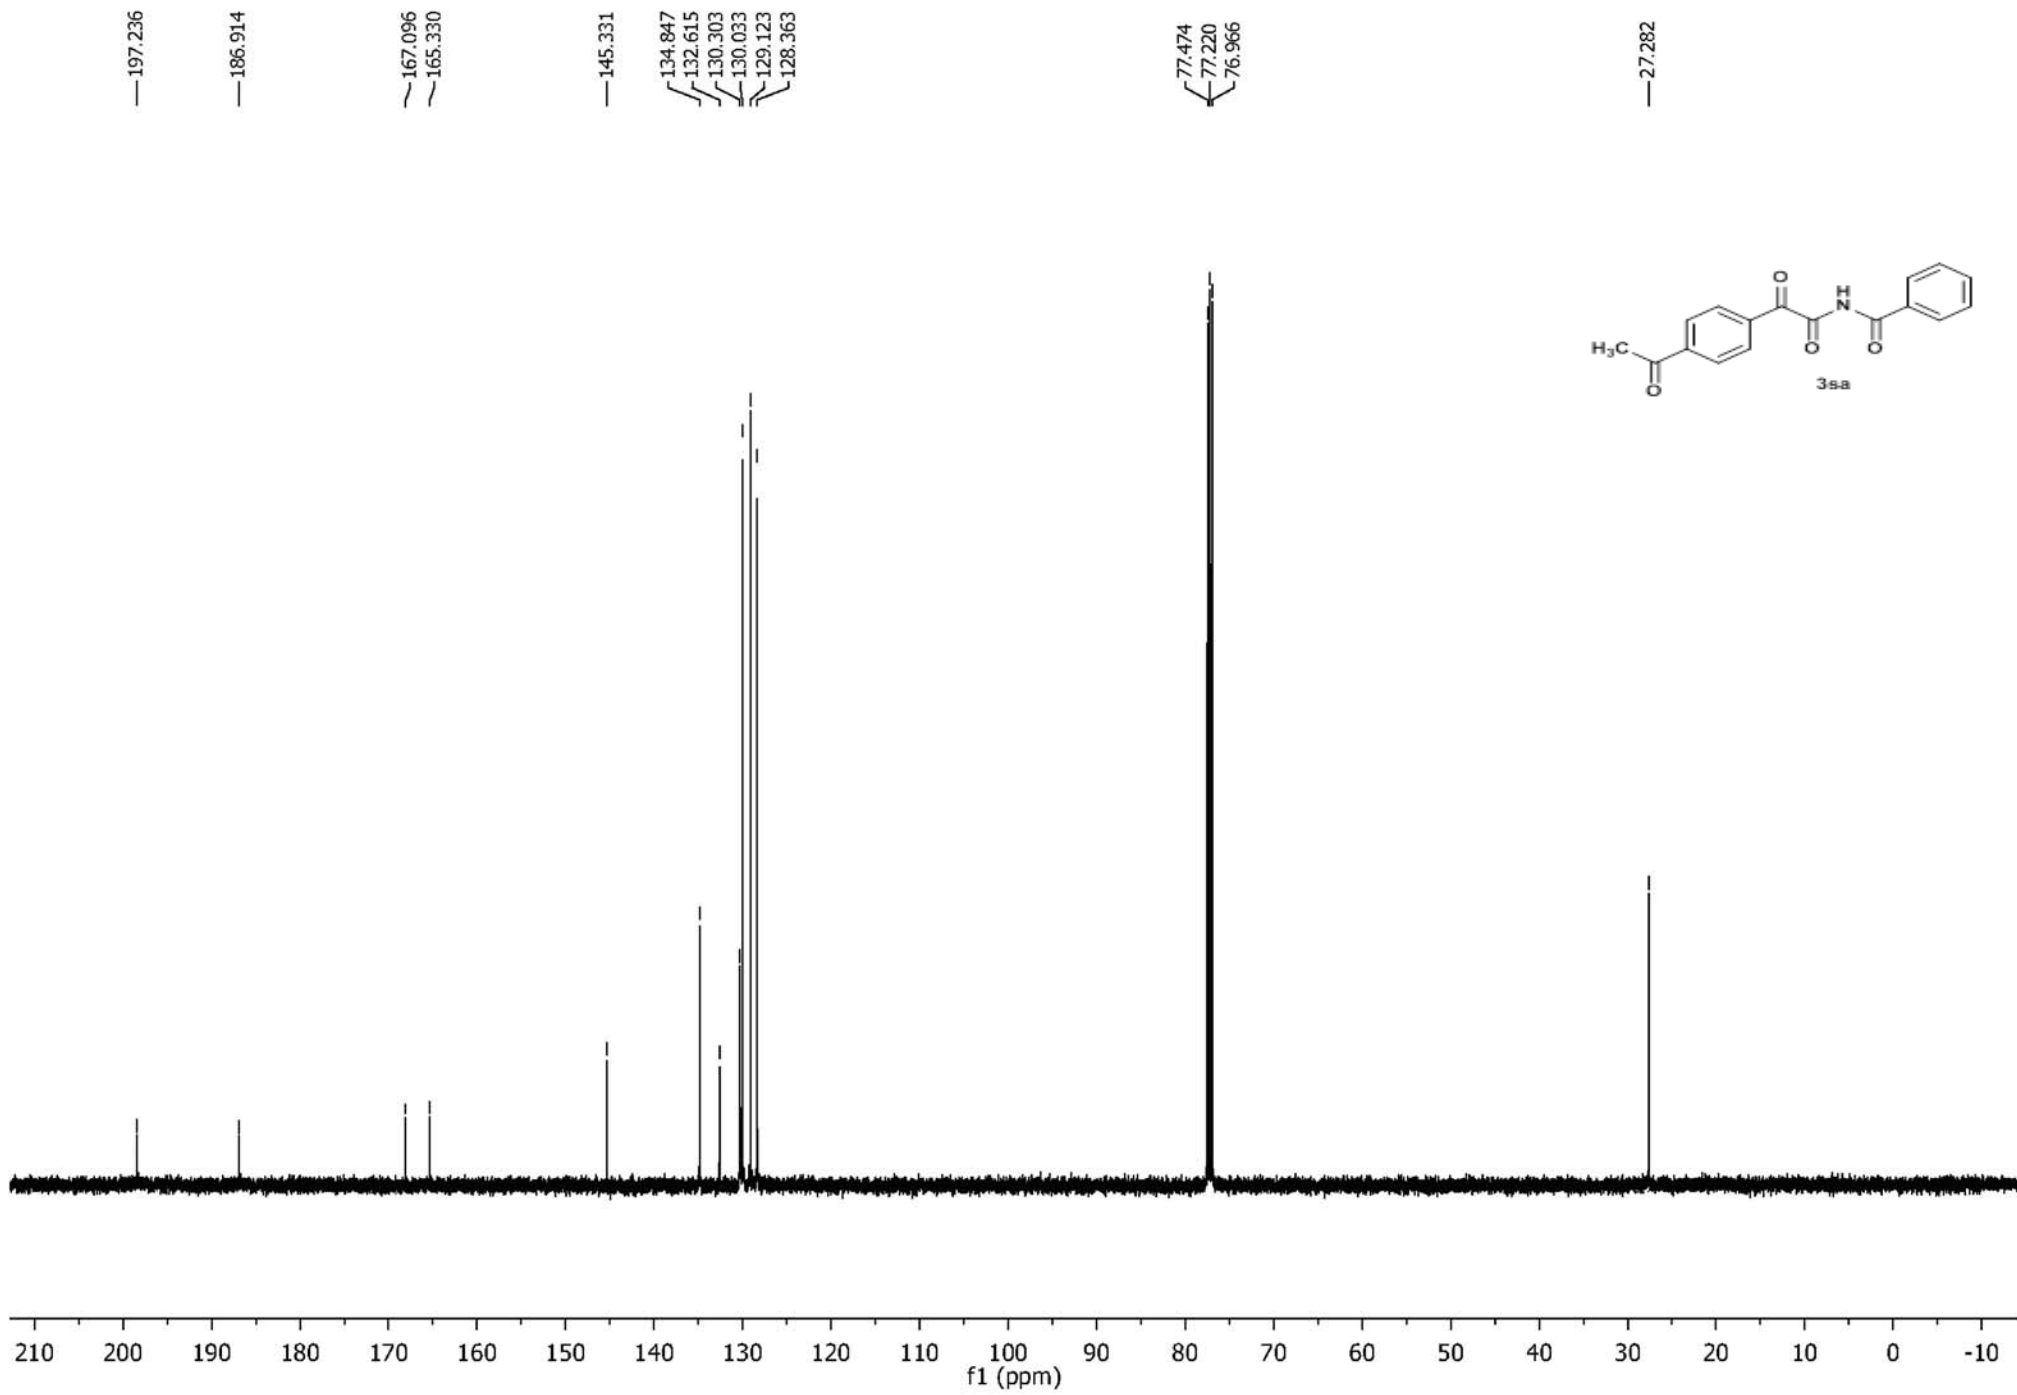

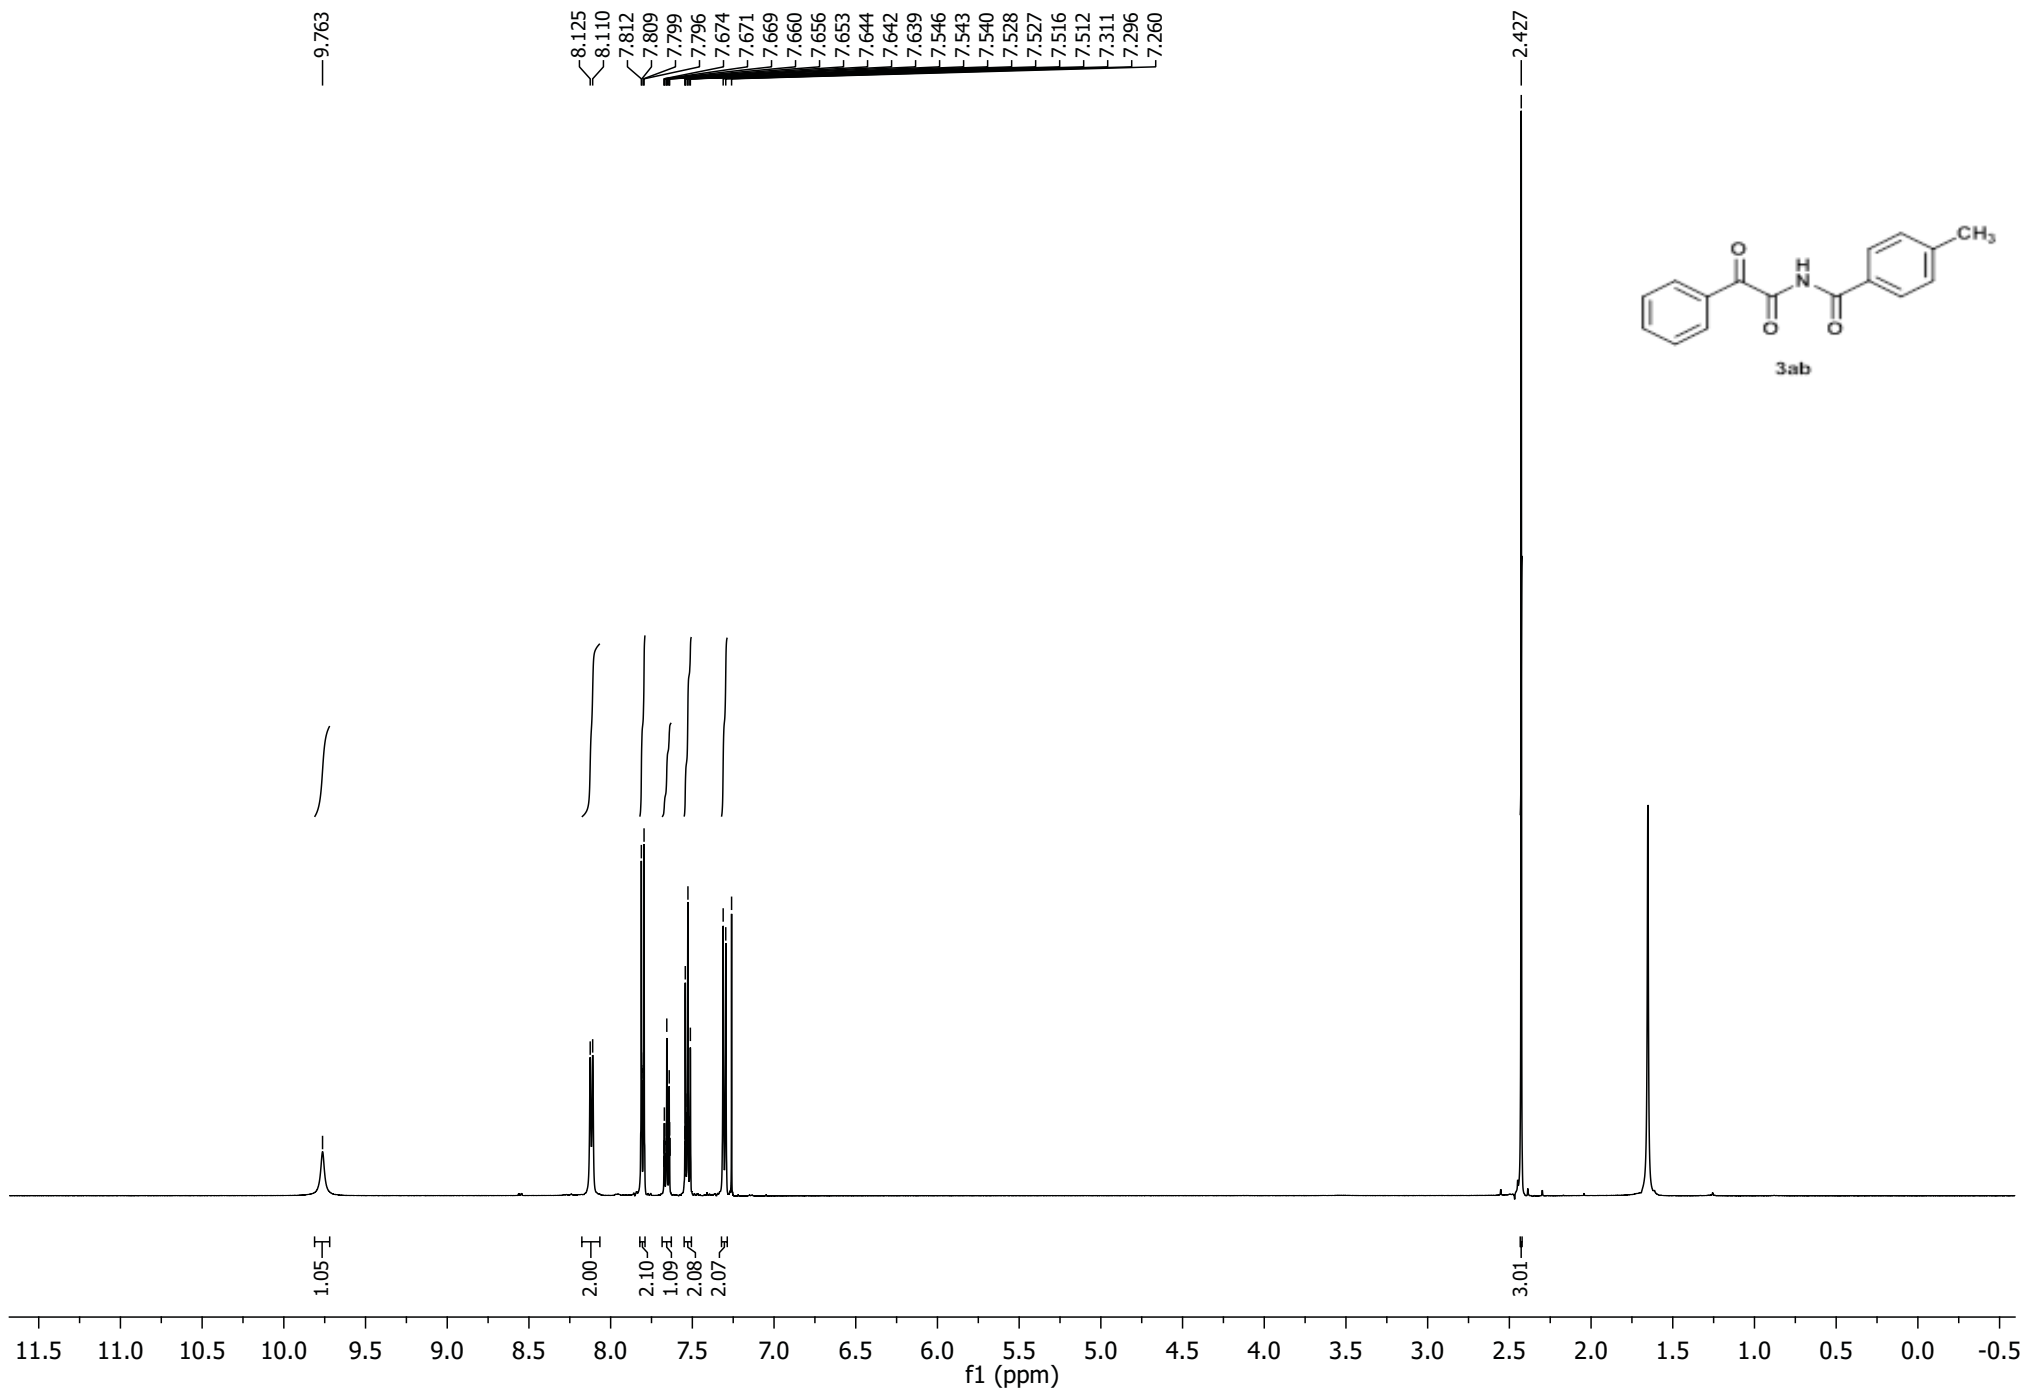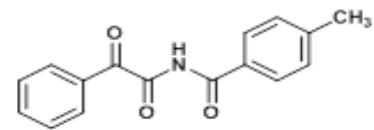

3ab



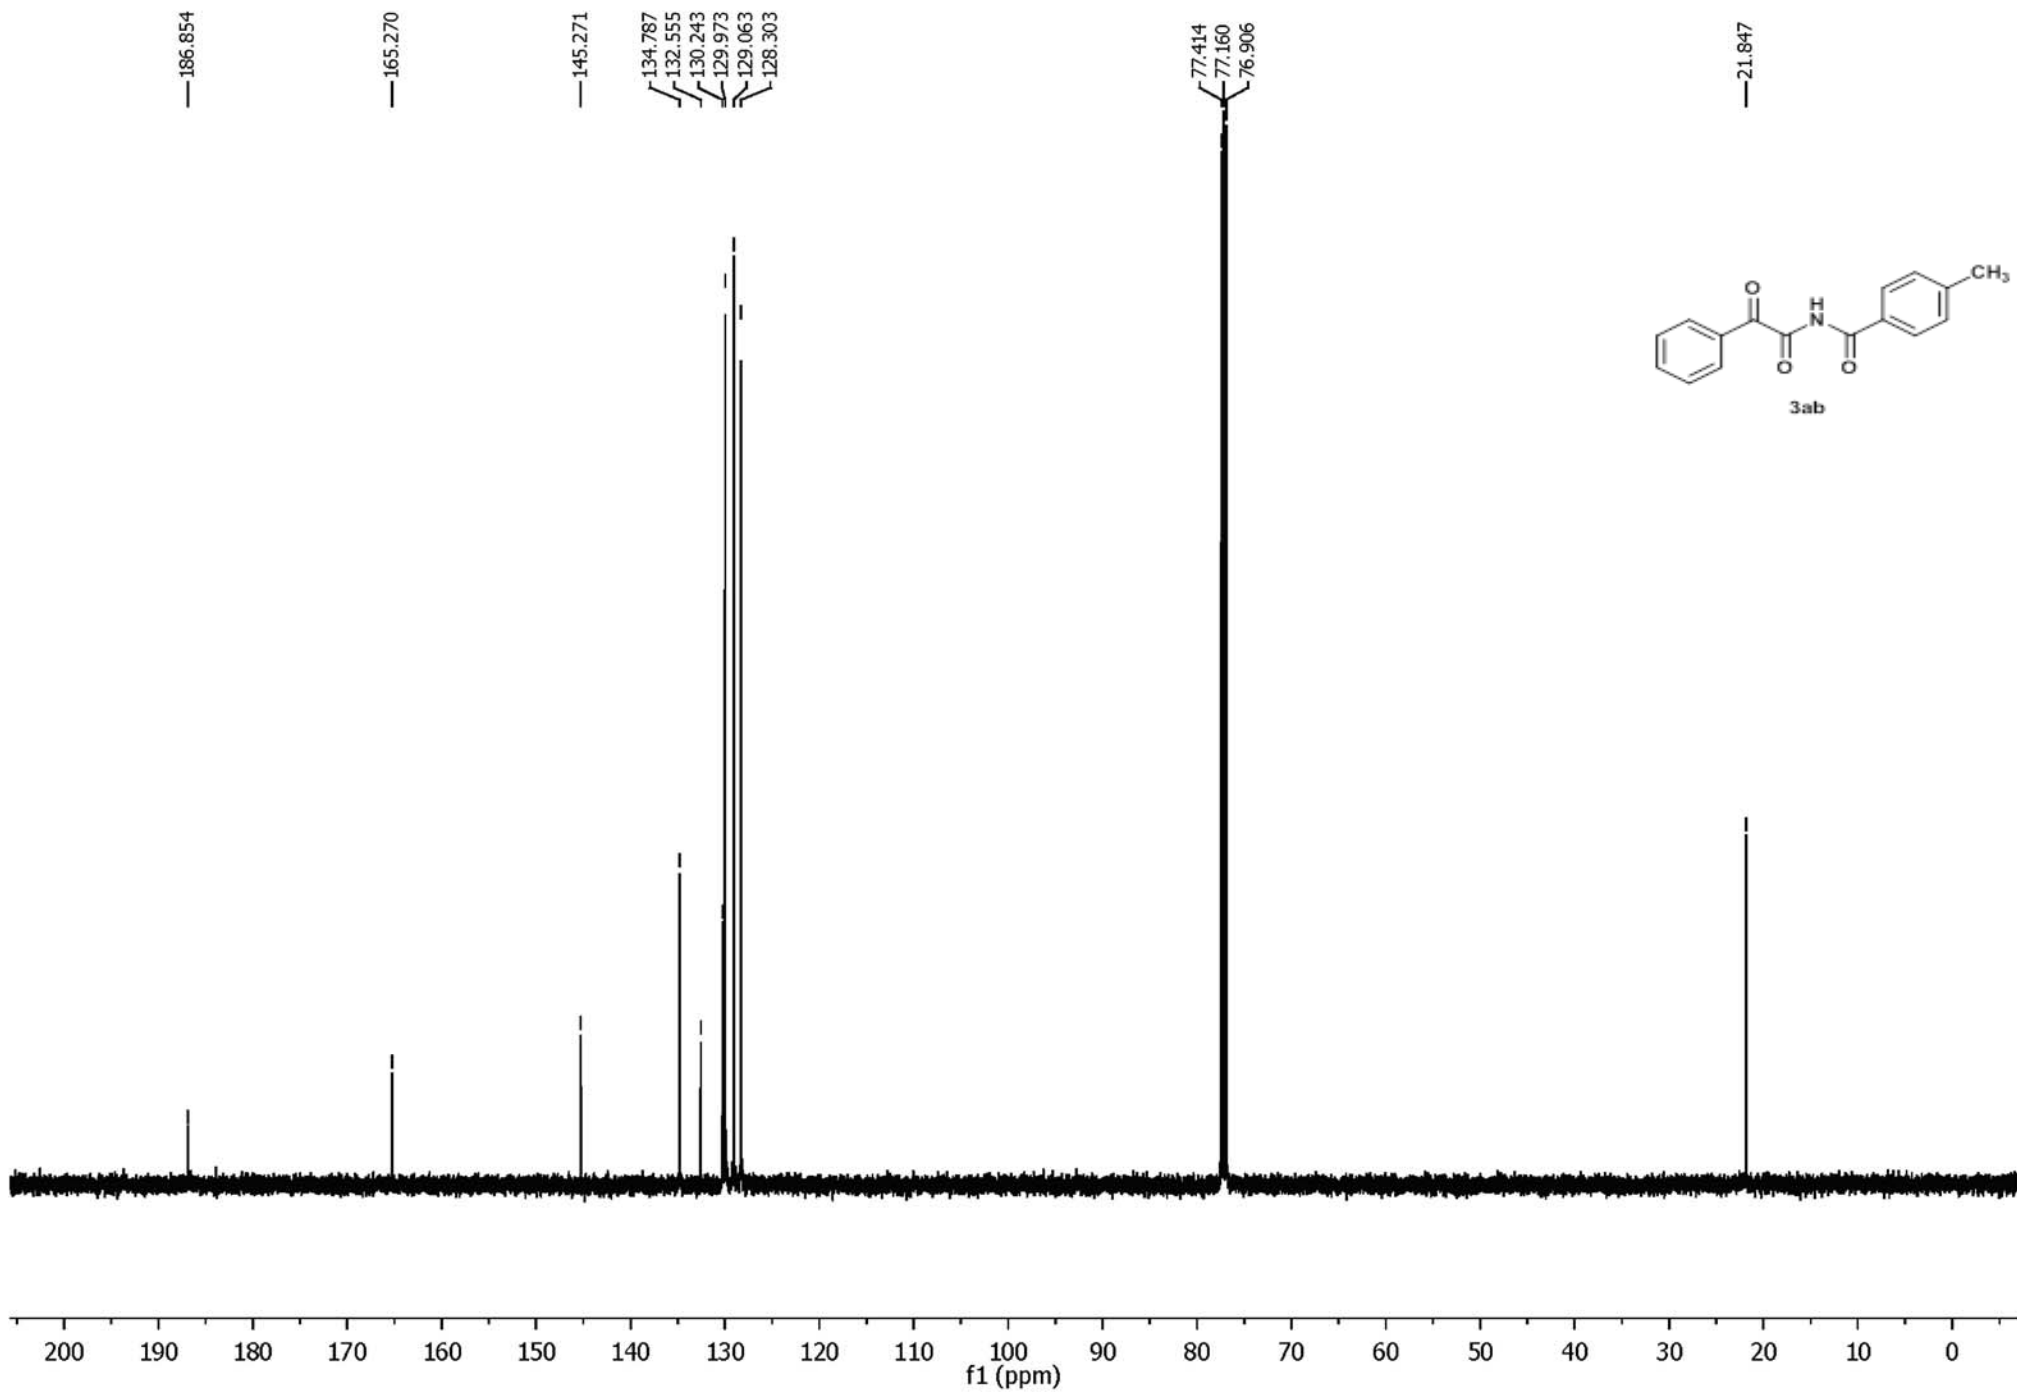

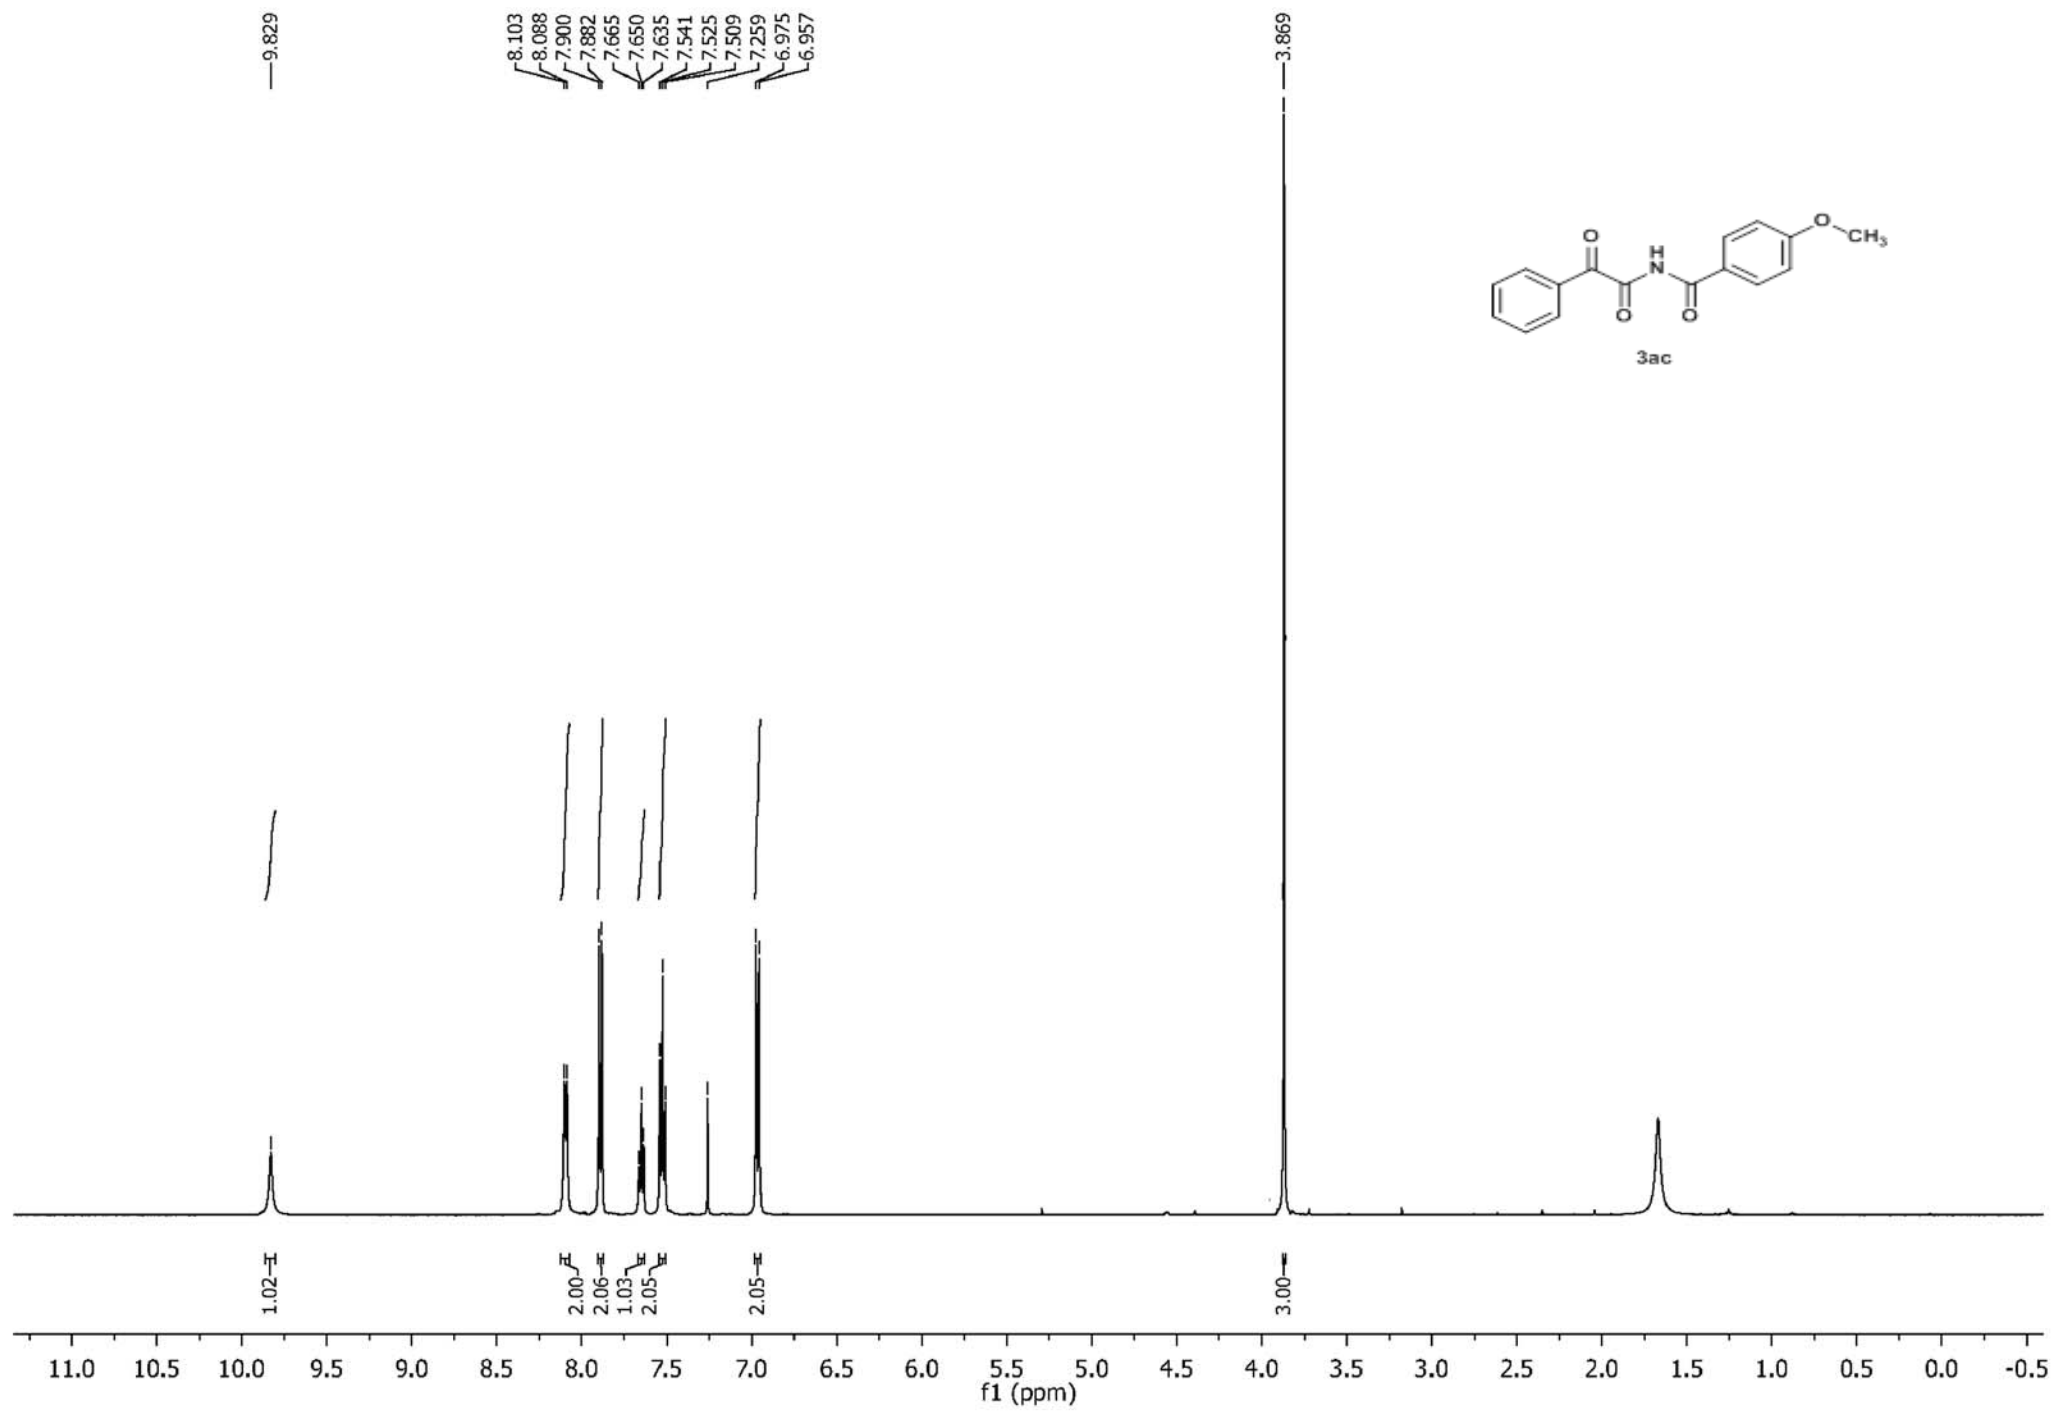

—186.991

164.798  
164.424

134.697  
132.631  
130.579  
130.110  
129.062

—123.052

—114.551

77.414  
77.160  
76.906

—55.758

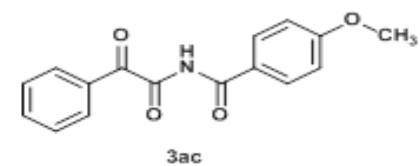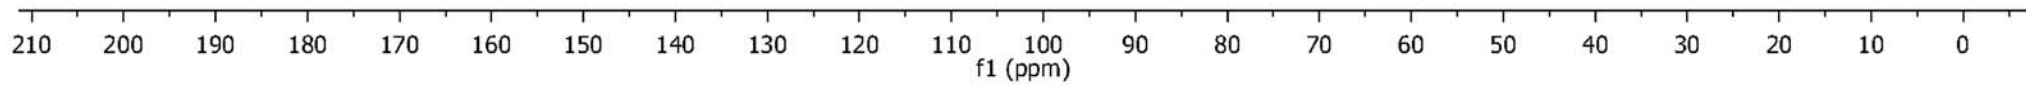

— 9.545

8.389  
8.371  
8.287  
8.270  
7.894  
7.880  
7.696  
7.681  
7.666  
7.563  
7.547  
7.532  
7.260

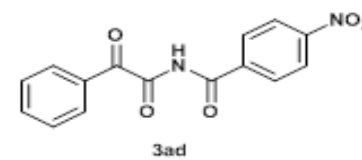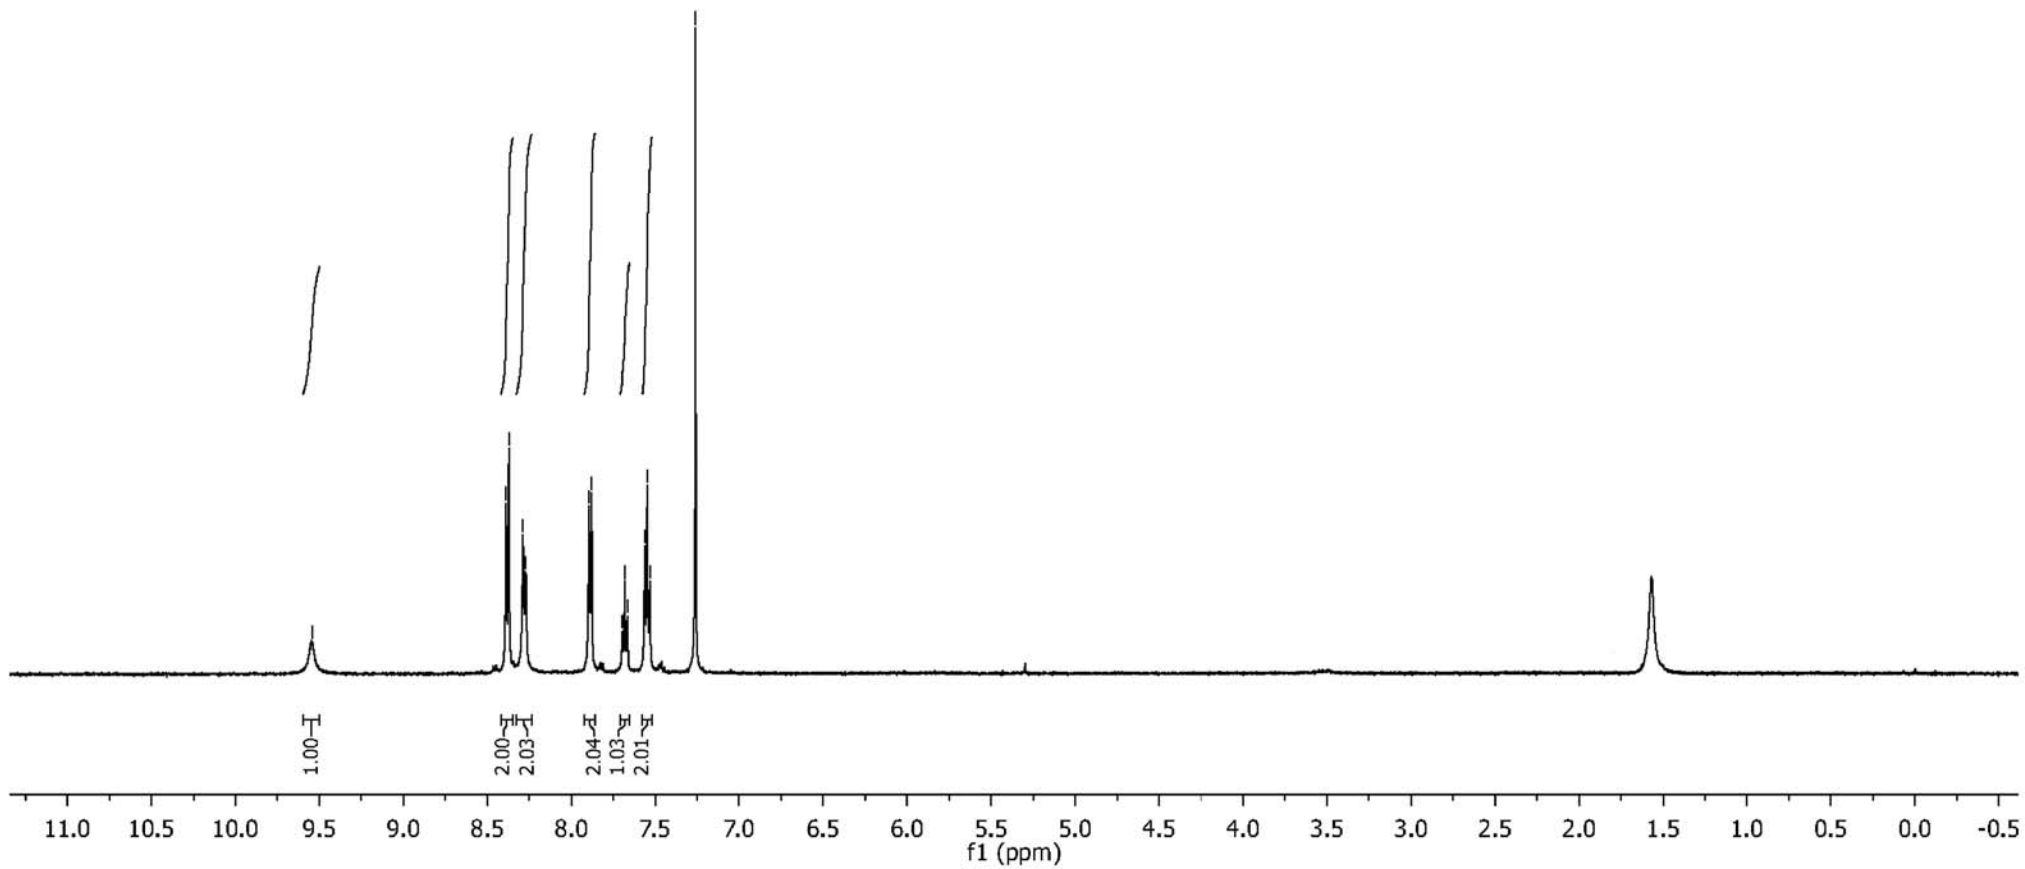

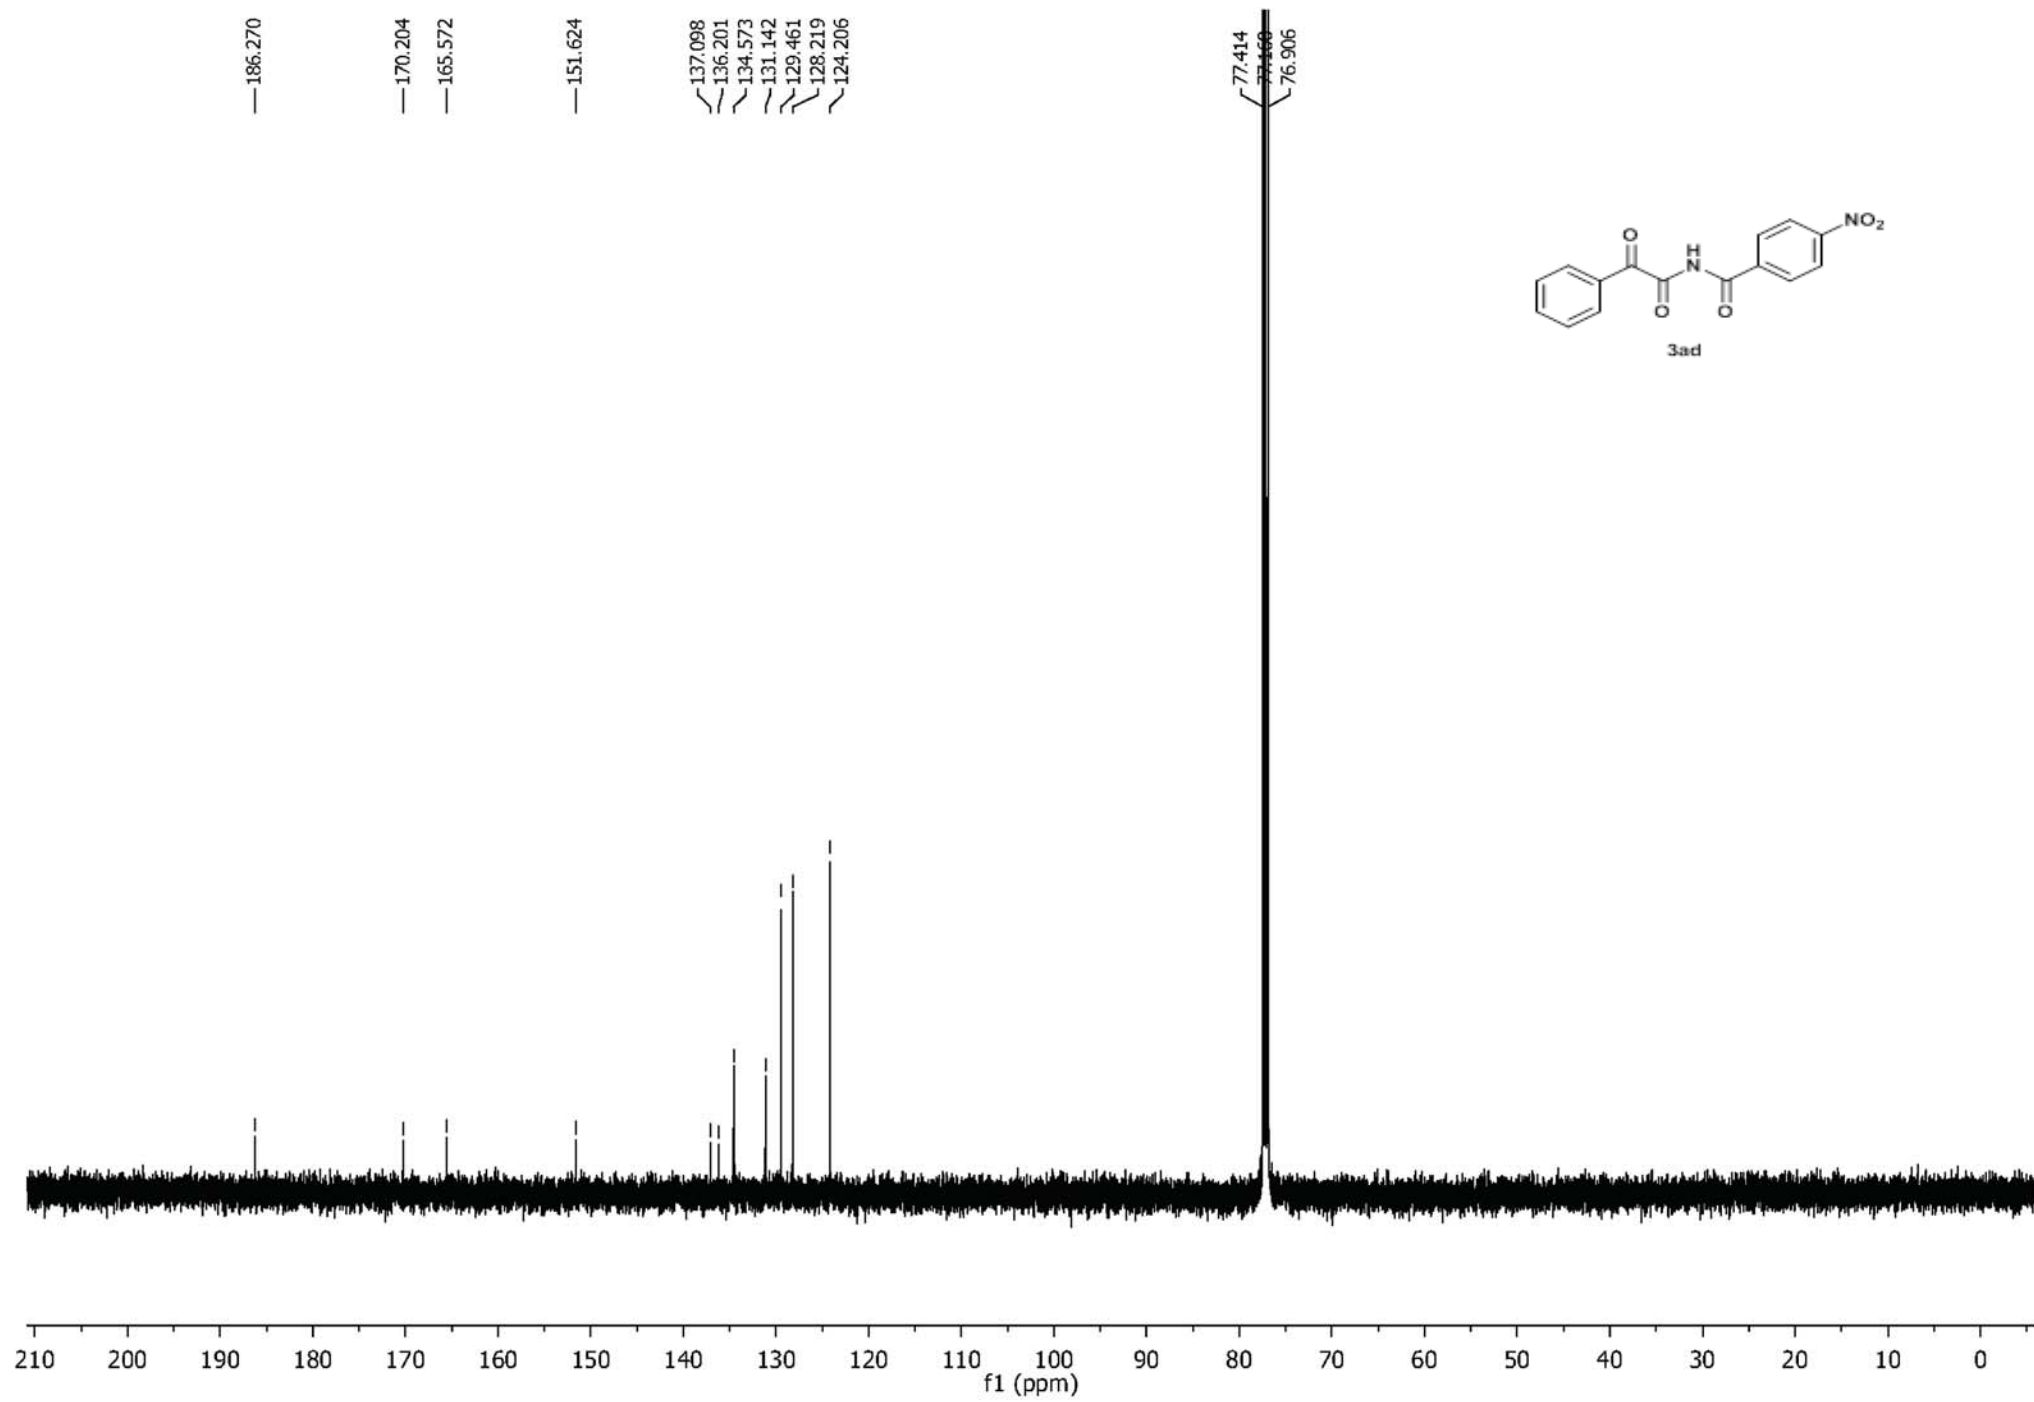

Supplement: c4ra07556k1.pdf [file c4ra07556k1.pdf]
